# Supplementary material for: Large-scale rollout of extension training in Bangladesh: Challenges and opportunities for gender-inclusive participation
Source: PLoS One. 2022 Jul 8;17(7):e0270662. doi: 10.1371/journal.pone.0270662 (PMC9269913; doi:10.1371/journal.pone.0270662)
Supplement: S1 File — This is the minimal data set requested by the editor. This is not to be included in the manuscript. (XLSX) [file pone.0270662.s001.xlsx]

## Sheet: Appendix-I
Appendix.I: Venue-wise number of video show event(s), venue types, location (village, union, upazila, district and hub), number of audiences (male, female, total & registered), maize, wheat & rice cultivation status, type of videos screened in 18 project districts in 4 CIMMYT-BD hubs under CSISA-III project
SL #	Date	Time	Venue	Venue Types	Village	Union	Upazila	District	Hub	Audiences Registered (No:)			Registered farmers claimed for crop cultivation (No:)			Total Audiences (No:)			Type of video screened (No:)
										Male	Female	Total	Maize	Wheat	Rice	Male	Female	Total	EWS	HRS	FAW	Total
1	2019-10-17	3:00 pm-04:00 pm	Nasikhatun Tea Stall Side	Tea-stall	Napitkhali	Damurhuda	Damurhuda	Chuadanga	Jashore	28	5	33	32	3	23	28	5	33	1	1	1	3
2	2019-10-17	05:00am-06:00pm	Sardar Ali tea stall	Tea-stall	Chitla	Damurhuda	Damurhuda	Chuadanga	Jashore	35	0	35	35	5	30	150	0	150	1	1	1	3
3	2019-10-17	06:45pm-:08:00pm	Anik Computer & Telicome Infront	Shop	Chitla	Damurhuda	Damurhuda	Chuadanga	Jashore	55	0	55	54	16	22	100	0	100	1	1	1	3
4	2019-10-18	09:00am-10:00am	Safiqul Tea Stall Infront	Tea-stall	Dewli	Damurhuda	Damurhuda	Chuadanga	Jashore	23	18	41	37	12	30	23	18	41	1	1	1	3
5	2019-10-18	11:00am-12:00pm	Modaonpur Community Clinic Infront	Hospital Field	Bodonpur	Damurhuda	Damurhuda	Chuadanga	Jashore	8	33	41	38	5	28	8	33	41	1	1	1	3
6	2019-10-18	03:00pm-04:00pm	Potal Biswas House	Farmer House	Damurhuda	Damurhuda	Damurhuda	Chuadanga	Jashore	13	20	33	29	3	17	13	20	33	1	1	1	3
7	2019-10-18	05:00pm-06:00pm	Dewli Sobuj Songo Field	Club Field	Dewli	Damurhuda	Damurhuda	Chuadanga	Jashore	63	0	63	58	19	39	150	0	150	1	1	1	3
8	2019-10-18	06:30pm-:07:30pm	Star Club Field	Club Field	Dashami	Damurhuda	Damurhuda	Chuadanga	Jashore	30	7	37	32	5	24	250	50	300	1	1	1	3
9	2019-10-19	08:00am-09:00am	Khokon Tea Stall	Tea-stall	Gobindahuda	Damurhuda	Damurhuda	Chuadanga	Jashore	17	24	41	34	13	23	17	24	41	1	1	1	3
10	2019-10-19	10:00am-11:00am	Hatem Tea Stall	Tea-stall	Hativanga	Damurhuda	Damurhuda	Chuadanga	Jashore	39	16	55	53	14	27	39	16	55	1	1	1	3
11	2019-10-19	11:30am-12:45am	Khokon Tea Stall	Tea-stall	Hativanga	Damurhuda	Damurhuda	Chuadanga	Jashore	41	0	41	38	6	21	41	0	41	1	1	1	3
12	2019-10-19	04:00pm-05:30pm	Purapara More	Road Side	Purapara	Damurhuda	Damurhuda	Chuadanga	Jashore	37	0	37	30	8	19	37	0	37	1	1	1	3
13	2019-10-19	06:00pm-07:15pm	Kamal Mondol House	Farmer House	Koshoghata	Damurhuda	Damurhuda	Chuadanga	Jashore	36	23	59	51	10	43	200	50	250	1	1	1	3
14	2019-10-20	10:00am-11:00am	Miraj Uddin House	Farmer House	Chuttipur	Natiputa	Damurhuda	Chuadanga	Jashore	29	3	32	31	12	30	29	3	32	1	1	1	3
15	2019-10-20	11:30am-12:45pm	Moulabokso House	Farmer House	Potarpar	Natiputa	Damurhuda	Chuadanga	Jashore	14	27	41	40	10	33	14	27	41	1	1	1	3
16	2019-10-20	04:00pm-05:30pm	Natipota Chourasta More	Road Side	Natipota	Natiputa	Damurhuda	Chuadanga	Jashore	78	8	86	84	30	73	78	8	86	1	1	1	3
17	2019-10-20	06:30pm-08:00pm	Chuttipur Club More	Road Side	Chuttipur	Natiputa	Damurhuda	Chuadanga	Jashore	64	0	64	62	34	54	64	0	64	1	1	1	3
18	2019-10-21	04:00pm-05:00pm	Chandrabas Bazar	Market Place	Chandrabas	Natiputa	Damurhuda	Chuadanga	Jashore	43	0	43	40	13	39	150	0	150	1	1	1	3
19	2019-10-21	06:30pm-08:00pm	Charulia Bazar	Market Place	Charulia	Natiputa	Damurhuda	Chuadanga	Jashore	90	0	90	81	24	80	200	0	200	1	1	1	3
20	2019-10-22	08:00am-09:30am	Mostafizur Rahman House	Farmer House	Hogoldanga	Natuda	Damurhuda	Chuadanga	Jashore	24	29	53	45	7	40	24	19	43	1	1	1	3
21	2019-10-22	11:00am-12:30pm	Berbari Dorgatola Sojol Tea Stall	Tea-stall	Berbari	Natuda	Damurhuda	Chuadanga	Jashore	20	8	28	27	5	16	20	8	28	1	1	1	3
22	2019-10-22	02:00pm-03:30pm	Najrul Islam House	Farmer House	Bhugiratpur	Natiputa	Damurhuda	Chuadanga	Jashore	26	15	41	36	5	32	26	15	41	1	1	1	3
23	2019-10-22	06:00pm-07:00pm	Hemayet Club More	Road Side	Hemayetpur	Natiputa	Damurhuda	Chuadanga	Jashore	85	0	85	85	16	78	225	0	225	1	1	1	3
24	2019-10-22	07:45pm-09:00pm	Sohidul Islam Tea Stall	Tea-stall	Hogoldanga	Natiputa	Damurhuda	Chuadanga	Jashore	66	0	66	63	9	54	175	0	175	1	1	1	3
25	2019-10-23	10:00am-11:00am	Kashem Mohure Mango Gaeden	Farmer House	Komorpur	Karpashdanga	Damurhuda	Chuadanga	Jashore	29	6	35	35	4	21	35	6	41	1	1	1	3
26	2019-10-23	11:30am-12:45pm	Zohirul Islam Tea Stall	Tea-stall	Baghadanga	Karpashdanga	Damurhuda	Chuadanga	Jashore	29	9	38	38	6	26	29	9	38	0	1	1	2
27	2019-10-23	03:30pm-04:45pm	Nasir Member House	Farmer House	Baghadanga	Karpashdanga	Damurhuda	Chuadanga	Jashore	39	9	48	32	11	30	70	30	100	0	1	1	2
28	2019-10-24	12:00pm-01:00pm	Jahangir Alam Tea Stall	Tea-stall	Kanaidanga	Karpashdanga	Damurhuda	Chuadanga	Jashore	32	9	41	27	3	20	32	0	32	0	1	1	2
29	2019-10-25	11:00 am-12:00pm	Kamal Tea Stall Infront	Tea-stall	Dhannagara	Kuralgachhi	Damurhuda	Chuadanga	Jashore	54	0	54	50	3	23	54	0	54	0	1	1	2
30	2019-10-26	09:00am-10:30am	Faruke Tea Stall	Tea-stall	Ruitonpur	Chitla	Alamdanga	Chuadanga	Jashore	41	0	41	41	7	20	41	0	41	1	1	1	3
31	2019-10-26	11:00am-12:30pm	Taleb Tea Stall	Tea-stall	Ruitonpur	Chitla	Alamdanga	Chuadanga	Jashore	33	4	37	36	9	17	33	4	37	1	1	1	3
32	2019-10-26	03:00pm-04:30pm	Brother Brother Traders	Market Place	Chitla	Chitla	Alamdanga	Chuadanga	Jashore	63	0	63	62	15	37	150	0	150	1	1	1	3
33	2019-10-26	05:00pm-06:30pm	Laltu Shop Infront	Shop	Chitla	Chitla	Alamdanga	Chuadanga	Jashore	36	5	41	39	8	24	36	5	41	1	1	1	3
34	2019-10-26	07:00 pm-08:30pm	Nur Islam Tea Stall	Tea-stall	Kulpala	Chitla	Alamdanga	Chuadanga	Jashore	70	11	81	81	17	43	200	50	250	1	1	1	3
35	2019-10-27	09:00am-10:00am	Younus Tea Stall	Tea-stall	Buichitla	Kuralgachhi	Damurhuda	Chuadanga	Jashore	41	0	41	31	10	28	41	0	41	1	1	1	3
36	2019-10-27	11:00am-12:00pm	Shoto Tea Stall	Tea-stall	Chandipur	Kuralgachhi	Damurhuda	Chuadanga	Jashore	27	0	27	23	3	12	27	0	27	1	1	1	3
37	2019-10-27	02:00pm-03:00pm	Zima Tea Stall Infront	Tea-stall	Chandipur	Kuralgachhi	Damurhuda	Chuadanga	Jashore	54	0	54	47	13	23	54	0	54	1	1	1	3
38	2019-10-27	04:00pm-05:15pm	Mamun Traders Infront	Shop	Chandipur	Kuralgachhi	Damurhuda	Chuadanga	Jashore	45	0	45	39	9	22	150	0	150	1	1	1	3
39	2019-10-27	06:40pm-07:30pm	Shopon Shop Infront	Shop	Durgapur	Kuralgachhi	Damurhuda	Chuadanga	Jashore	41	10	51	47	6	28	150	50	200	0	1	1	2
40	2019-10-27	08:15pm-09:15pm	Rana Tea Stall Infront	Tea-stall	Komorpur	Karpashdanga	Damurhuda	Chuadanga	Jashore	56	0	56	48	6	20	150	0	150	0	1	1	2
41	2019-10-28	09:00am-10:00am	Ahasan Mondol House	Farmer House	Bishnopur	Juranpur	Damurhuda	Chuadanga	Jashore	19	43	62	61	0	34	30	70	100	0	1	1	2
42	2019-10-28	11:00am-12:00pm	Toiab Ali House	Farmer House	Bishnopur	Juranpur	Damurhuda	Chuadanga	Jashore	20	31	51	49	2	34	30	60	90	0	1	1	2
43	2019-10-28	03:00pm-04:30pm	Sakib Tea Stall Infront	Tea-stall	Ibrahimpur	Juranpur	Damurhuda	Chuadanga	Jashore	63	0	63	61	1	36	150	0	150	0	1	1	2
44	2019-10-28	05:00pm-06:00pm	Ibrahimpur Govt Primary School	Educational Institution	Ibrahimpur	Juranpur	Damurhuda	Chuadanga	Jashore	59	0	59	59	2	33	125	0	125	0	1	1	2
45	2019-10-28	07:00pm-08:00pm	Rahamnan Tea Stall	Tea-stall	Ibrahimpur	Juranpur	Damurhuda	Chuadanga	Jashore	35	17	52	50	1	31	40	60	100	0	1	1	2
46	2019-10-29	10:00am-11:00am	Shajahan Tea Stall Infront	Tea-stall	Gopalpur	Juranpur	Damurhuda	Chuadanga	Jashore	20	16	36	33	0	24	20	16	36	0	1	1	2
47	2019-10-29	11:30am-12:30pm	Masud Tea Stall	Tea-stall	Gopalpur	Juranpur	Damurhuda	Chuadanga	Jashore	28	13	41	39	0	28	28	13	41	0	1	1	2
48	2019-10-29	03:00pm-:4:00pm	Manjurul Karim Tea Stall Infront	Shop	Duliarpur	Juranpur	Damurhuda	Chuadanga	Jashore	44	1	45	44	5	26	44	1	45	1	1	1	3
49	2019-10-29	04:30pm-05:30pm	Pintu Shop Infront	Shop	Duliarpur	Juranpur	Damurhuda	Chuadanga	Jashore	26	6	32	30	6	20	26	6	32	1	1	1	3
50	2019-10-29	06:30pm-08:00pm	Brother Brother Traders Infront	Shop	Kolabari	Juranpur	Damurhuda	Chuadanga	Jashore	58	3	61	59	3	37	130	20	150	0	1	1	2
51	2019-10-30	09:00am-10:00am	Mofajjel House	Farmer House	Juranpur	Juranpur	Damurhuda	Chuadanga	Jashore	11	29	40	34	0	29	11	29	40	0	1	1	2
52	2019-10-30	11:00am-12:30pm	Monthu Mondol House	Farmer House	Laxmipur	Juranpur	Damurhuda	Chuadanga	Jashore	21	36	57	56	2	37	21	36	57	0	1	1	2
53	2019-10-30	03:00pm-04:00pm	Nazrul Islam House	Farmer House	Laxmipur	Juranpur	Damurhuda	Chuadanga	Jashore	16	27	43	41	2	26	16	27	43	0	1	1	2
54	2019-10-30	04:30pm-05:30pm	Sukur Ali Shop Infront	Shop	Laxmipur	Juranpur	Damurhuda	Chuadanga	Jashore	53	0	53	52	0	29	53	0	53	0	1	1	2
55	2019-10-30	06:30pm-07:30pm	Bishnopur Bazar	Market Place	Bishnopur	Juranpur	Damurhuda	Chuadanga	Jashore	103	0	103	85	4	66	300	0	300	0	1	1	2
56	2019-10-30	08:00pm-09:00pm	Juranpur Battloa More	Road Side	Juranpur	Juranpur	Damurhuda	Chuadanga	Jashore	45	0	45	41	0	17	125	0	125	0	1	1	2
57	2019-10-31	09:00am-10:00am	Sirajul Islam House	Farmer House	Hapania	Chitla	Alamdanga	Chuadanga	Jashore	22	18	40	30	9	26	22	18	40	1	1	1	3
58	2019-10-31	11:30am-12:30pm	Kayem House	Farmer House	Hapania	Chitla	Alamdanga	Chuadanga	Jashore	22	19	41	40	15	29	22	19	41	1	1	1	3
59	2019-10-31	02:30pm-04:00pm	Amir Ali House	Farmer House	Mochaingar	Gangni	Alamdanga	Chuadanga	Jashore	30	19	49	38	21	33	30	19	49	1	1	1	3
60	2019-10-31	04:30pm-05:30pm	M/S Ikbul Traders Infront	Shop	Mochaingar	Gangni	Alamdanga	Chuadanga	Jashore	33	1	34	27	10	25	33	1	34	1	1	1	3
61	2019-10-31	06:30pm-07:30pm	Faruk Tea Stall Infront	Tea-stall	Hapania	Chitla	Alamdanga	Chuadanga	Jashore	102	0	102	94	63	36	300	0	300	1	1	1	3
62	2019-11-01	10:00am-11:30am	Ma Varitys Store Infront	Shop	Bandarbhita	Gangni	Alamdanga	Chuadanga	Jashore	40	10	50	44	26	46	40	10	50	1	1	1	3
63	2019-11-01	02:00pm-03:00pm	Tara Mia House	Farmer House	Boro Gangni	Gangni	Alamdanga	Chuadanga	Jashore	39	0	39	35	16	36	39	0	39	1	1	1	3
64	2019-11-01	04:30pm-05:30pm	Sonowar Hossain Tea Stall Infront	Tea-stall	Boro Gangni	Gangni	Alamdanga	Chuadanga	Jashore	88	0	88	72	49	79	200	0	200	1	1	1	3
65	2019-11-01	06:00pm-07:30pm	Shajahan Tea Stall Infront	Tea-stall	Boro Gangni	Gangni	Alamdanga	Chuadanga	Jashore	66	10	76	66	41	66	200	50	250	1	1	1	3
66	2019-11-02	09:00-am-10:00am	Zahidul Islam House	Farmer House	Andipur	Gangni	Alamdanga	Chuadanga	Jashore	13	28	41	35	11	29	13	28	41	1	1	1	3
67	2019-11-02	10:30am-11:30am	Osman House	Farmer House	Boro Gangni	Gangni	Alamdanga	Chuadanga	Jashore	11	25	36	31	5	25	11	25	36	1	1	1	3
68	2019-11-02	12:00pm-01:00pm	Zahirul Islam Shop Infront	Shop	Nanbar	Gangni	Alamdanga	Chuadanga	Jashore	18	1	19	17	11	14	18	1	19	1	1	1	3
69	2019-11-02	04:30pm-05:30pm	Billal House	Farmer House	Pirpur	Alukdia	Chuadanga Sadar	Chuadanga	Jashore	33	27	60	58	10	37	50	100	150	1	1	1	3
70	2019-11-02	06:00pm-07:30pm	Jashim Tea Stall Infront	Tea-stall	Pirpur	Alukdia	Chuadanga Sadar	Chuadanga	Jashore	85	2	87	83	16	62	150	50	200	1	1	1	3
71	2019-11-03	09:00am-10:00am	Ahasan Mondol House	Farmer House	Khadimpur	Khadimpur	Alamdanga	Chuadanga	Jashore	12	33	45	39	1	32	12	3	15	1	1	1	3
72	2019-11-03	11:30am-12:30pm	Sajibur Tea Stall Infront	Tea-stall	Batiapara	Khadimpur	Alamdanga	Chuadanga	Jashore	31	0	31	30	11	29	31	0	31	1	1	1	3
73	2019-11-03	02:30pm-04:00pm	Lal Mohammad Tea Stall Infront	Tea-stall	Rangpur	Khadimpur	Alamdanga	Chuadanga	Jashore	35	6	41	34	3	30	35	6	41	1	1	1	3
74	2019-11-03	05:00pm-06:00pm	Batiapara Community Clinic Infront	Hospital Field	Batiapara	Khadimpur	Alamdanga	Chuadanga	Jashore	53	7	60	52	12	52	100	50	150	1	1	1	3
75	2019-11-03	07:00pm-08:00pm	Irdis malitha House	Farmer House	Akondobaria	Alukdia	Chuadanga Sadar	Chuadanga	Jashore	32	20	52	46	5	38	100	50	150	0	1	1	2
76	2019-11-04	11:00am-12:30pm	Ohimuddin House	Farmer House	Ramchandrapur	Khadimpur	Alamdanga	Chuadanga	Jashore	29	7	36	34	7	22	29	7	36	1	1	1	3
77	2019-11-04	03:00pm-04:30pm	Bujlur Rahaman Tea Stall Infront	Tea-stall	Jadobpur	Kumari	Alamdanga	Chuadanga	Jashore	27	15	42	37	1	30	27	15	42	0	1	1	2
78	2019-11-04	05:30pm-07:00pm	Ramjan Ali House	Farmer House	Jugirhuda	Khadimpur	Alamdanga	Chuadanga	Jashore	34	17	51	44	8	34	34	17	51	0	1	1	2
79	2019-11-04	07:30pm-08:30pm	Pach Kalampur School Field	Educational Institution	Pach kalampur	Khadimpur	Alamdanga	Chuadanga	Jashore	70	0	70	68	3	51	200	0	200	0	1	1	2
80	2019-11-05	09:00am-10:00am	Afsar Malitha Tea Stall Infront	Tea-stall	Jadobpur	Kumari	Alamdanga	Chuadanga	Jashore	31	17	48	38	1	37	31	17	48	0	1	1	2
81	2019-11-05	11:00am-12:30pm	Alomgir Shop Infront	Shop	Hardi	Hardi	Alamdanga	Chuadanga	Jashore	31	16	47	39	8	37	31	16	47	1	1	1	3
82	2019-11-05	03:00pm-04:30pm	Babul Biswas House	Farmer House	Char Jadobpur	Hardi	Alamdanga	Chuadanga	Jashore	19	22	41	30	8	34	19	22	41	1	1	1	3
83	2019-11-05	05:30pm-07:00pm	Hardi Govt Girls primary School Field	Educational Institution	Hardi	Hardi	Alamdanga	Chuadanga	Jashore	97	0	97	81	33	76	300	0	300	1	1	1	3
84	2019-11-05	07:30pm-08:30pm	Modina Shop Infront Hardi Bazar	Market Place	Hardi	Hardi	Alamdanga	Chuadanga	Jashore	59	0	59	49	7	57	150	0	150	1	1	1	3
85	2019-11-06	09:00am-10:00am	Razib Mondol House	Farmer House	Hazrahati	Pourosova	Chuadanga Sadar	Chuadanga	Jashore	7	24	31	25	2	8	7	24	31	0	1	1	2
86	2019-11-06	10:30am-11:30am	Moynul Mondol House	Farmer House	Hazrahati	Pourosova	Chuadanga Sadar	Chuadanga	Jashore	4	39	43	39	0	25	4	39	43	0	1	1	2
87	2019-11-06	02:30pm-03:30pm	Abubukkar Tea Stall Infront	Tea-stall	Boailmari	Mominpur	Chuadanga Sadar	Chuadanga	Jashore	30	3	33	29	0	19	30	3	33	0	1	1	2
88	2019-11-06	05:30pm-07:00pm	Bottola More	Road Side	Boailmari	Mominpur	Chuadanga Sadar	Chuadanga	Jashore	48	32	80	75	1	75	150	50	200	0	1	1	2
89	2019-11-06	07:30pm-08:45pm	Tohidul Islam Tea Stall Infront	Tea-stall	Hazrahati	Pourosova	Chuadanga Sadar	Chuadanga	Jashore	74	0	74	68	3	46	240	10	250	0	1	1	2
90	2019-11-07	09:00am-10:00am	Hatem Ali House	Farmer House	Poltadanga	Baradi	Alamdanga	Chuadanga	Jashore	14	37	51	49	6	30	14	37	51	0	1	1	2
91	2019-11-07	11:30am-12:30pm	Nazmul Haque House	Farmer House	Poltadanga	Baradi	Alamdanga	Chuadanga	Jashore	21	12	33	30	2	23	21	12	33	0	1	1	2
92	2019-11-07	02:30pm-03:30pm	jahangir Haque House	Farmer House	Poltadanga	Baradi	Alamdanga	Chuadanga	Jashore	13	10	23	22	3	11	13	10	23	0	1	1	2
93	2019-11-07	04:30pm-05:30pm	Poltadanga Bazar Bottola	Market Place	Poltadanga	Baradi	Alamdanga	Chuadanga	Jashore	60	0	60	56	4	32	125	0	125	0	1	1	2
94	2019-11-07	06:00pm-07:00pm	Somsar Ali Tea Stall Infront	Tea-stall	Atharokhada	Baradi	Alamdanga	Chuadanga	Jashore	63	8	71	66	0	37	225	25	250	0	1	1	2
95	2019-11-07	07:30pm-08:30pm	Baradi high School Field	Educational Institution	Baradi	Baradi	Alamdanga	Chuadanga	Jashore	40	0	40	36	4	28	100	0	100	0	1	1	2
96	2019-11-08	09:00am- 10:30am	Jahangir Shop Infront	Shop	Nothidanga	Baradi	Alamdanga	Chuadanga	Jashore	22	19	41	40	9	25	22	19	41	1	1	1	3
97	2019-11-08	11:30am-12:30pm	Sorek Fwraj House	Farmer House	Nothidanga	Baradi	Alamdanga	Chuadanga	Jashore	10	44	54	45	10	35	30	70	100	1	1	1	3
98	2019-11-08	03:00pm-04:00pm	Hossain House	Farmer House	Anandabas	Baradi	Alamdanga	Chuadanga	Jashore	21	17	38	33	8	25	21	17	38	1	1	1	3
99	2019-11-10	11:00am-12:30pm	Alo Tea Stall	Tea-stall	Baliuarpur	Mominpur	Chuadanga Sadar	Chuadanga	Jashore	53	10	63	57	1	45	53	10	63	0	1	1	2
100	2019-11-10	03:00pm-04:00pm	Asadul Tea Stall	Tea-stall	Gholdari	Ailhas	Alamdanga	Chuadanga	Jashore	38	3	41	31	0	30	38	3	41	0	1	1	2
101	2019-11-10	04:30pm-05:30pm	Jahangir Tea Stall Infront	Tea-stall	Gholdari	Ailhas	Alamdanga	Chuadanga	Jashore	33	20	53	39	0	47	33	20	53	0	1	1	2
102	2019-11-10	06:00pm-07:00pm	Amirul Tea Stall Infront	Tea-stall	Jahapur	Nagdah	Alamdanga	Chuadanga	Jashore	39	11	50	35	6	47	80	20	100	0	1	1	2
103	2019-11-11	09:00am-10:30am	Sahjahn House	Farmer House	Pol Bagunda	Ailhas	Alamdanga	Chuadanga	Jashore	35	27	62	60	3	57	40	50	90	0	1	1	2
104	2019-11-11	11:30am-12:45pm	Ikbal House	Farmer House	Ailhas	Ailhas	Alamdanga	Chuadanga	Jashore	26	17	43	40	2	42	26	17	43	0	1	1	2
105	2019-11-11	02:30pm-04:00pm	Mokket House	Farmer House	Khas Bagunda	Ailhas	Alamdanga	Chuadanga	Jashore	31	22	53	53	0	52	31	22	53	0	1	1	2
106	2019-11-11	04:30pm-05:30pm	Khas Bagunda Bazar Anamika Farmer House Infront	Market Place	Khas Bagunda	Ailhas	Alamdanga	Chuadanga	Jashore	48	0	48	44	5	45	48	0	48	0	1	1	2
107	2019-11-11	06:00pm-07:00pm	Ailhas Bazar	Market Place	Ailhas	Ailhas	Alamdanga	Chuadanga	Jashore	75	0	75	71	0	72	150	0	150	0	1	1	2
108	2019-11-12	09:00am-10:00am	Wahid House	Farmer House	Chandipur	Padmabila	Chuadanga Sadar	Chuadanga	Jashore	8	12	20	20	0	12	8	12	20	0	1	1	2
109	2019-11-12	10:30am-12:00pm	Kamruzzaman House	Farmer House	Khazura	Padmabila	Chuadanga Sadar	Chuadanga	Jashore	20	26	46	41	0	30	20	26	46	0	1	1	2
110	2019-11-12	02:00pm-03:00pm	Nazmul Islam House	Farmer House	Subdiea	Padmabila	Chuadanga Sadar	Chuadanga	Jashore	19	18	37	33	0	23	19	18	37	0	1	1	2
111	2019-11-12	04:00pm-05:30pm	Akimul Tea Stall Infront	Tea-stall	Chandipur	Padmabila	Chuadanga Sadar	Chuadanga	Jashore	47	6	53	41	0	33	60	30	90	0	1	1	2
112	2019-11-12	06:00pm-07:00pm	Subarek Mondol Tea Stall Infront	Tea-stall	Baliakandi	Padmabila	Chuadanga Sadar	Chuadanga	Jashore	57	7	64	54	0	47	100	50	150	0	1	1	2
113	2019-11-12	07:30pm-08:30pm	Meher Shop Infront	Shop	Subdiea	Padmabila	Chuadanga Sadar	Chuadanga	Jashore	69	4	73	68	0	50	100	75	175	0	1	1	2
114	2019-11-13	10:00am-11:30am	Loskar House	Farmer House	Kushadanga	Padmabila	Chuadanga Sadar	Chuadanga	Jashore	6	31	37	34	0	25	6	31	37	0	1	1	2
115	2019-11-13	03:00pm-04:30pm	Solimuddin Tea Stall Infront	Tea-stall	Hogoldanga	Padmabila	Chuadanga Sadar	Chuadanga	Jashore	31	36	67	62	0	49	50	100	150	0	1	1	2
116	2019-11-13	06:00pm-07:00pm	Kushadanga Govt: Primary School Field	Educational Institution	Kushadanga	Padmabila	Chuadanga Sadar	Chuadanga	Jashore	58	0	58	54	0	39	125	25	150	0	1	1	2
117	2019-11-13	07:30pm-08:30pm	Baliakandi Bazar	Market Place	Baliakandi	Padmabila	Chuadanga Sadar	Chuadanga	Jashore	63	0	63	57	0	50	150	0	150	0	1	1	2
118	2019-11-14	11:00am-12:30pm	Ana House	Farmer House	Jugirhuda	Shankarchandra	Chuadanga Sadar	Chuadanga	Jashore	16	24	40	38	0	29	16	24	40	0	1	1	2
119	2019-11-14	02:30pm-04:00pm	Humayan Kabir House	Farmer House	Makhaldanga	Shankarchandra	Chuadanga Sadar	Chuadanga	Jashore	33	36	69	60	0	61	33	36	69	0	1	1	2
120	2019-11-14	04:30pm-05:30pm	Zamat Ali Tea Stall Infront	Tea-stall	Garabari	Shankarchandra	Chuadanga Sadar	Chuadanga	Jashore	69	0	69	62	0	53	100	20	120	0	1	1	2
121	2019-11-14	06:00pm-07:00pm	Younus Mondol Chatal	Shop	Jaforpur	Shankarchandra	Chuadanga Sadar	Chuadanga	Jashore	68	0	68	56	0	57	130	20	150	0	1	1	2
122	2019-11-14	07:30pm-08:30pm	Awal Shop Infront	Shop	Jaforpur	Shankarchandra	Chuadanga Sadar	Chuadanga	Jashore	39	9	48	45	0	44	50	30	80	0	1	1	2
123	2019-11-15	10:00am-11:00am	Sohidul Islam House	Farmer House	Balaigachi	Shankarchandra	Chuadanga Sadar	Chuadanga	Jashore	10	18	28	20	0	25	10	18	28	0	1	1	2
124	2019-11-15	03:30pm-04:30pm	Mannan Shop Infront	Shop	Kalupol	Titudah	Chuadanga Sadar	Chuadanga	Jashore	23	11	34	33	0	32	23	11	34	0	1	1	2
125	2019-11-15	06:00pm-07:00pm	Taijul Islam House	Farmer House	Jadobpur	Shankarchandra	Chuadanga Sadar	Chuadanga	Jashore	46	24	70	58	0	62	75	50	125	0	1	1	2
126	2019-11-15	07:30pm-08:30pm	Mashikul Tea Stall InIn Infront	Tea-stall	Kirongachi	Shankarchandra	Chuadanga Sadar	Chuadanga	Jashore	47	14	61	54	0	48	100	50	150	0	1	1	2
127	2019-11-16	10:00am-11:00am	Rafiqul Tea Stall Infront	Tea-stall	Chhaighoria	Shankarchandra	Chuadanga Sadar	Chuadanga	Jashore	40	8	48	48	0	32	40	8	48	0	1	1	2
128	2019-11-16	11:30am-12:45pm	Mukter Tea Stall Infront	Tea-stall	Chhaighoria	Shankarchandra	Chuadanga Sadar	Chuadanga	Jashore	24	13	37	33	0	29	24	13	37	0	1	1	2
129	2019-11-16	02:30pm-04:00pm	Ahan Ali House	Farmer House	Chhaighoria	Shankarchandra	Chuadanga Sadar	Chuadanga	Jashore	17	18	35	33	0	21	17	18	35	0	1	1	2
130	2019-11-16	06:00pm-07:00pm	IPM Club Field	Club Field	Nehalpur	Begumpur	Chuadanga Sadar	Chuadanga	Jashore	75	9	84	83	0	73	200	50	250	0	1	1	2
131	2019-11-16	07:30pm-08:30pm	Sukchand Tea Stall Infront	Tea-stall	Sreeal Bouali	Begumpur	Chuadanga Sadar	Chuadanga	Jashore	70	0	70	65	0	56	200	0	200	0	1	1	2
132	2019-11-17	11:00am-12:00pm	Johar Ali House	Farmer House	Begumpur	Begumpur	Chuadanga Sadar	Chuadanga	Jashore	20	9	29	25	0	15	20	9	29	0	1	1	2
133	2019-11-17	03:00pm-04:00pm	Abdul Ohab House	Farmer House	Soto Shalua	Titudah	Chuadanga Sadar	Chuadanga	Jashore	22	17	39	36	0	29	22	17	39	0	1	1	2
134	2019-11-17	04:00pm-05:30pm	Kacha Bazar Begumpur	Market Place	Begumpur	Begumpur	Chuadanga Sadar	Chuadanga	Jashore	57	0	57	47	0	32	100	0	100	0	1	1	2
135	2019-11-17	06:00pm-07:00pm	Uzzal Tea Stall Infront	Tea-stall	Soto Shalua	Titudah	Chuadanga Sadar	Chuadanga	Jashore	47	7	54	45	0	44	100	50	150	0	1	1	2
136	2019-11-17	07:30pm-08:30pm	Anarul Tea Stall Infront	Tea-stall	Soto Shalua	Titudah	Chuadanga Sadar	Chuadanga	Jashore	49	0	49	46	0	38	100	20	120	0	1	1	2
137	2019-11-18	11:00am-12:00pm	Amtola More Dosta	Road Side	Dosta	Begumpur	Chuadanga Sadar	Chuadanga	Jashore	34	0	34	31	0	26	34	0	34	0	1	1	2
138	2019-11-18	04:00pm-05:30pm	Hafiz Tea Stall Infront	Tea-stall	Kestopur	Begumpur	Chuadanga Sadar	Chuadanga	Jashore	44	9	53	42	0	38	44	9	53	0	1	1	2
139	2019-11-18	06:00pm-07:00pm	Akram Market InIn Infront Kestopur Bazar	Market Place	Kestopur	Begumpur	Chuadanga Sadar	Chuadanga	Jashore	78	0	78	67	0	65	200	0	200	0	1	1	2
140	2019-11-18	07:30pm-08:30pm	Osman Ghoni Tea Stall Infront	Tea-stall	Kundipur	Begumpur	Chuadanga Sadar	Chuadanga	Jashore	48	4	52	47	0	42	130	20	150	0	1	1	2
141	2019-11-19	11:00am-12:30pm	Taojimuddin House	Farmer House	Sailmari	Begumpur	Chuadanga Sadar	Chuadanga	Jashore	24	33	57	41	0	52	24	33	57	0	1	1	2
142	2019-11-19	02:30pm-04:00pm	Babul Akther House	Farmer House	Sailmari	Begumpur	Chuadanga Sadar	Chuadanga	Jashore	39	9	48	39	0	41	39	9	48	0	1	1	2
143	2019-11-19	04:30pm-05:30pm	Mukther Tea Stall Infront	Tea-stall	Ujalpur	Begumpur	Chuadanga Sadar	Chuadanga	Jashore	53	0	53	45	0	49	90	10	100	0	1	1	2
144	2019-11-19	06:00pm-07:00pm	Kakoli Traders Infront Dorsona Bus Stop	Bus Stand	Darson	Darsona Pourosova	Damurhuda	Chuadanga	Jashore	27	0	27	26	0	18	27	0	27	0	1	1	2
145	2019-11-19	07:30pm-08:30pm	Math Para Football Field	Play Ground	Ujalpur	Begumpur	Chuadanga Sadar	Chuadanga	Jashore	69	8	77	72	0	63	170	30	200	0	1	1	2
146	2019-11-21	09:30am-10:30am	Answar Mondol House	Farmer House	Titudah	Titudah	Chuadanga Sadar	Chuadanga	Jashore	15	35	50	48	0	39	15	35	50	0	1	1	2
147	2019-11-21	11:30am-12:30pm	Khoda Bokso House	Farmer House	Titudah	Titudah	Chuadanga Sadar	Chuadanga	Jashore	16	19	35	29	2	32	16	19	35	0	1	1	2
148	2019-11-21	03:30pm-04:30pm	Firoz Ahammed House	Farmer House	Titudah	Titudah	Chuadanga Sadar	Chuadanga	Jashore	41	15	56	52	0	51	41	15	56	0	1	1	2
149	2019-11-21	06:00pm-07:00pm	Johir Tea Stall Infront	Tea-stall	Titudah	Titudah	Chuadanga Sadar	Chuadanga	Jashore	69	0	69	66	0	66	250	0	250	0	1	1	2
150	2019-11-21	07:30pm-08:30pm	Brac Office Infront Kharagoda Bazar	Market Place	Kharagoda	Titudah	Chuadanga Sadar	Chuadanga	Jashore	57	0	57	50	0	49	100	0	100	0	1	1	2
151	2019-11-22	09:30am-10:30am	Surot Ali House	Farmer House	Boalia	Kutubpur	Chuadanga Sadar	Chuadanga	Jashore	20	19	39	29	0	29	20	19	39	0	1	1	2
152	2019-11-22	11:30am-12:30pm	Fozlu Rahaman House	Farmer House	Kutubpur	Kutubpur	Chuadanga Sadar	Chuadanga	Jashore	15	24	39	36	0	31	15	24	39	0	1	1	2
153	2019-11-22	03:00pm-04:30pm	Mohammad Ali House	Farmer House	Kutubpur	Kutubpur	Chuadanga Sadar	Chuadanga	Jashore	20	28	48	47	0	45	20	28	48	0	1	1	2
154	2019-11-22	06:00pm-07:20pm	Kutobpur Secondary Primary School Field	Educational Institution	Kutubpur	Kutubpur	Chuadanga Sadar	Chuadanga	Jashore	68	0	68	64	7	65	150	0	150	1	1	1	3
155	2019-11-23	10:00am-11:00am	Anowar House	Farmer House	Jadobpur	Kutubpur	Chuadanga Sadar	Chuadanga	Jashore	11	35	46	43	0	38	11	35	46	0	1	1	2
156	2019-11-23	11:30am-12:30pm	Ramjan Ali House	Farmer House	Nabinnagor	Kutubpur	Chuadanga Sadar	Chuadanga	Jashore	7	28	35	34	0	24	7	28	35	0	1	1	2
157	2019-11-23	04:30pm-05:30pm	Nabinnagor Primary School Field	Educational Institution	Nabinnagor	Kutubpur	Chuadanga Sadar	Chuadanga	Jashore	20	30	50	44	0	44	20	30	50	0	1	1	2
158	2019-11-23	06:00pm-07:00pm	Sattar Mia House	Farmer House	Nabinnagor	Kutubpur	Chuadanga Sadar	Chuadanga	Jashore	46	13	59	52	0	48	130	20	150	0	1	1	2
159	2019-11-23	07:30pm-08:30pm	Bari Biswas House	Farmer House	Nabinnagor	Kutubpur	Chuadanga Sadar	Chuadanga	Jashore	59	13	72	66	0	66	150	50	200	0	1	1	2
160	2019-11-24	11:00am-12:30pm	Badsha House	Farmer House	Aliarpur	Kutubpur	Chuadanga Sadar	Chuadanga	Jashore	12	40	52	9	0	48	12	40	52	0	1	1	2
161	2019-11-24	03:00pm-04:00pm	Fojlur Rahaman House	Farmer House	Murtujapir	Kutubpur	Chuadanga Sadar	Chuadanga	Jashore	19	18	37	5	5	24	19	18	37	1	1	1	3
162	2019-11-24	06:300pm-07:00pm	Sarowar Chatal	Shop	Alukdia	Alukdia	Chuadanga Sadar	Chuadanga	Jashore	61	4	65	60	11	51	300	50	350	1	1	1	3
163	2019-11-24	07:30pm-09:00pm	Rahaman House	Farmer House	Akondobaria	Alukdia	Chuadanga Sadar	Chuadanga	Jashore	52	21	73	68	7	57	200	50	250	1	1	1	3
164	2019-11-25	10:00am- 11:30am	Abdus Salam House	Farmer House	Faridpur	Belgachi	Alamdanga	Chuadanga	Jashore	8	22	30	21	2	29	8	22	30	1	1	1	3
165	2019-11-25	03:00pm-04:30pm	Belgachi Parishad Field	Union Parishad Campus	Belgachi	Belgachi	Alamdanga	Chuadanga	Jashore	20	0	20	16	0	17	20	0	20	0	1	1	2
166	2019-11-25	04:30pm-05:20pm	Sohidul Shop Infront Puroton Bazar	Market Place	Belgachi	Belgachi	Alamdanga	Chuadanga	Jashore	52	0	52	50	0	48	100	0	100	0	1	1	2
167	2019-11-25	06:00pm-07:00pm	Ma-Moni Shop Front	Shop	Faridpur	Belgachi	Alamdanga	Chuadanga	Jashore	60	4	64	51	5	56	125	25	150	0	1	1	2
168	2019-11-25	07:30pm-09:00pm	Rayhan Feed Infront Faridpur Bazar	Market Place	Faridpur	Belgachi	Alamdanga	Chuadanga	Jashore	102	0	102	81	0	88	300	0	300	0	1	1	2
169	2019-11-26	10:00am-11:00am	Aman Uddin House	Farmer House	Bhedamari	Nagdah	Alamdanga	Chuadanga	Jashore	14	24	38	36	24	36	14	24	38	1	1	1	3
170	2019-11-26	11:30am-12:30pm	Mojibul Mondol House	Farmer House	Khejurtola	Nagdah	Alamdanga	Chuadanga	Jashore	12	16	28	25	1	24	12	16	28	0	1	1	2
171	2019-11-26	02:00pm-03:30pm	Zalal Mondol House	Farmer House	Khejurtola	Nagdah	Alamdanga	Chuadanga	Jashore	17	24	41	3	7	36	17	24	41	1	1	1	3
172	2019-11-26	04:00pm-05:00pm	Jhumur House	Farmer House	Khejurtola	Nagdah	Alamdanga	Chuadanga	Jashore	14	26	40	34	3	39	14	26	40	1	1	1	3
173	2019-11-26	05:30pm-07:00pm	Monthu Tea Stall Inront Khejurtola Bazar	Market Place	Khejurtola	Nagdah	Alamdanga	Chuadanga	Jashore	88	0	88	79	25	87	200	0	200	1	1	1	3
174	2019-11-26	07:30pm-08:30pm	Ramjan Tea Stall Infront	Tea-stall	Bhedamari	Nagdah	Alamdanga	Chuadanga	Jashore	47	3	50	41	30	49	70	30	100	1	1	1	3
175	2019-11-27	10:00am-11:30am	Ayub Ali House	Farmer House	Hijolgari	Begumpur	Chuadanga Sadar	Chuadanga	Jashore	8	36	44	36	0	43	8	36	44	0	1	1	2
176	2019-11-27	12:00pm-01:00pm	Nur Islam House	Farmer House	Hijolgari	Begumpur	Chuadanga Sadar	Chuadanga	Jashore	23	13	36	32	0	31	23	13	36	0	1	1	2
177	2019-11-27	04:00pm-05:00pm	Abbas Mia House	Farmer House	Boro Shalua	Titudah	Chuadanga Sadar	Chuadanga	Jashore	26	18	44	43	0	40	26	18	44	0	1	1	2
178	2019-11-27	05:30pm-07:00pm	Riaz Uddin House	Farmer House	Boro Shalua	Titudah	Chuadanga Sadar	Chuadanga	Jashore	65	4	69	61	0	63	175	25	200	0	1	1	2
179	2019-11-27	07:30pm-08:30pm	Al -Amin Tea Stall Infront	Tea-stall	Boro Shalua	Titudah	Chuadanga Sadar	Chuadanga	Jashore	69	12	81	73	0	76	200	50	250	0	1	1	2
180	2019-11-28	10:00am-11:00am	Jhontu Mia House	Farmer House	Goraitupi	Titudah	Chuadanga Sadar	Chuadanga	Jashore	12	29	41	35	0	34	12	29	41	0	1	1	2
181	2019-11-28	11:30am-12:30pm	Alim House	Farmer House	Goraitupi	Titudah	Chuadanga Sadar	Chuadanga	Jashore	18	25	43	35	0	36	18	25	43	0	1	1	2
182	2019-11-28	02:30pm-03:30pm	Kalam House	Farmer House	Goraitupi	Titudah	Chuadanga Sadar	Chuadanga	Jashore	14	21	35	34	0	34	14	21	35	0	1	1	2
183	2019-11-28	04:00pm-05:00pm	Haider Shop Infront	Shop	Goraitupi	Titudah	Chuadanga Sadar	Chuadanga	Jashore	41	0	41	33	0	33	41	0	41	0	1	1	2
184	2019-11-28	05:30pm-07:00pm	Moslam Mollik House	Farmer House	Kalupol	Titudah	Chuadanga Sadar	Chuadanga	Jashore	76	8	84	77	14	82	250	50	300	1	1	1	3
185	2019-11-28	07:30pm-09:00pm	Shajahan Tea Stall Infront Kalupol Bazar	Market Place	Kalupol	Titudah	Chuadanga Sadar	Chuadanga	Jashore	76	0	76	63	0	71	250	0	250	0	1	1	2
186	2019-11-29	02:30pm-03:30pm	Anowar Hossain Tea Stall Infront	Tea-stall	Kanaidanga	Karpashdanga	Damurhuda	Chuadanga	Jashore	39	2	41	40	0	36	39	2	41	0	1	1	2
187	2019-11-29	05:30pm-07:00pm	Mithun Tea Stall Infront	Tea-stall	Baghadanga	Karpashdanga	Damurhuda	Chuadanga	Jashore	51	13	64	60	20	58	200	50	250	1	1	1	3
188	2019-11-29	07:30pm-08:30pm	Kadim Ali House	Farmer House	Pirpurkulla	Karpashdanga	Damurhuda	Chuadanga	Jashore	63	5	68	61	0	59	275	25	300	0	1	1	2
189	2019-11-30	10:00am-11:00am	Khadam Bokso House	Farmer House	Bhultia	Kutubpur	Chuadanga Sadar	Chuadanga	Jashore	4	30	34	23	0	24	4	30	34	0	1	1	2
190	2019-11-30	11:30am-12:30pm	Abdul Mazid House	Farmer House	Bhultia	Kutubpur	Chuadanga Sadar	Chuadanga	Jashore	12	18	30	19	0	28	12	18	30	0	1	1	2
191	2019-11-30	05:30pm-07:00pm	Sabad Ali House	Farmer House	Bhultia	Kutubpur	Chuadanga Sadar	Chuadanga	Jashore	10	23	33	7	0	33	10	23	33	0	1	1	2
192	2019-11-30	07:30pm-08:30pm	Badorgonj Bazar (Panhata)	Market Place	Aliarpur	Kutubpur	Chuadanga Sadar	Chuadanga	Jashore	68	0	68	42	0	57	200	0	200	0	1	1	2
193	2019-11-30	03:00pm-04:30pm	Sonirvor School Field	Educational Institution	Shahapur	Kutubpur	Chuadanga Sadar	Chuadanga	Jashore	54	9	63	56	0	54	175	25	200	0	1	1	2
194	2019-12-01	10:00am-11:00am	Islam Mondol House	Farmer House	Ashanandapur	Kutubpur	Chuadanga Sadar	Chuadanga	Jashore	21	18	39	36	0	36	21	18	39	0	1	1	2
195	2019-12-01	02:30pm-03:30pm	Tobjel Hossain House	Farmer House	Shahapur	Kutubpur	Chuadanga Sadar	Chuadanga	Jashore	15	24	39	37	0	33	15	24	39	0	1	1	2
196	2019-12-01	04:00pm-05:00pm	Mannan Sarkar House	Farmer House	Boalia	Kutubpur	Chuadanga Sadar	Chuadanga	Jashore	16	24	40	38	0	25	16	24	40	0	1	1	2
197	2019-12-01	05:30pm-07:00pm	Sentu Tea Stall Infront	Tea-stall	Ashanandapur	Kutubpur	Chuadanga Sadar	Chuadanga	Jashore	48	0	48	47	0	45	125	25	150	0	1	1	2
198	2019-12-01	07:30pm-08:30pm	Boalia Sarbojonin Pujamondol Field	Religious Establishment	Boalia	Kutubpur	Chuadanga Sadar	Chuadanga	Jashore	41	0	41	40	0	30	75	25	100	0	1	1	2
199	2019-12-02	10:00am-11:00am	M/S Dipti Tisha Traders Infront	Shop	Kathulia	Mominpur	Chuadanga Sadar	Chuadanga	Jashore	24	34	58	51	0	56	40	60	100	0	1	1	2
200	2019-12-02	11:30am-12:30pm	Nurul Bhuia House	Farmer House	Kobikhali	Mominpur	Chuadanga Sadar	Chuadanga	Jashore	10	23	33	28	0	29	10	23	33	0	1	1	2
201	2019-12-02	03:00pm-04:00pm	Mazid Mondol House	Farmer House	Kholishadanga	Mominpur	Chuadanga Sadar	Chuadanga	Jashore	32	23	55	48	0	47	40	60	100	0	1	1	2
202	2019-12-04	10:00am-11:00am	Moser Mollik House	Farmer House	Dariapur	Dariapur	Mujibnagor	Meherpur	Jashore	13	28	41	5	22	39	13	28	41	1	1	1	3
203	2019-12-04	11:30am-12:30pm	Maola Bokso House	Farmer House	Gourinagor	Dariapur	Mujibnagor	Meherpur	Jashore	16	45	61	8	35	52	16	45	61	1	1	1	3
204	2019-12-04	02:30pm-03:30pm	Rafiqul Tea House	Farmer House	Bhabanipur	Monakhali	Mujibnagor	Meherpur	Jashore	20	25	45	6	27	38	20	25	45	1	1	1	3
205	2019-12-04	04:00pm-05:00pm	Bablu Mia House	Farmer House	Monakhali	Monakhali	Mujibnagor	Meherpur	Jashore	19	43	62	18	55	60	40	60	100	1	1	1	3
206	2019-12-04	05:30pm-07:00pm	Faruq Tea Stall Infront	Tea-stall	Monakhali	Monakhali	Mujibnagor	Meherpur	Jashore	57	0	57	22	45	47	250	0	250	1	1	1	3
207	2019-12-05	10:00am-11:00am	SM Mohibul Store Infront	Shop	Garadob	Dhankhola	Gangni	Meherpur	Jashore	54	5	59	8	51	54	60	20	80	1	1	1	3
208	2019-12-05	11:30am-12:30pm	Aliar Rahaman House	Farmer House	Bashabaria	Dhankhola	Gangni	Meherpur	Jashore	24	38	62	12	41	53	40	60	100	1	1	1	3
209	2019-12-05	03:00pm-04:30pm	Kousar Tea Stall Infront	Tea-stall	Rajapur	Buriputa	Meherpur Sadar	Meherpur	Jashore	51	5	56	14	48	45	51	5	56	1	1	1	3
210	2019-12-05	05:30pm-07:00pm	Kacha Bazar Mohajonpur	Market Place	Mohajonpur	Mohajonpur	Meherpur Sadar	Meherpur	Jashore	107	0	107	67	82	102	300	0	300	1	1	1	3
211	2019-12-05	07:30pm-08:30pm	Rajabul Tea Stall Infront	Tea-stall	Jatarpur	Mohajonpur	Meherpur Sadar	Meherpur	Jashore	53	6	59	40	52	55	150	25	175	1	1	1	3
212	2019-12-06	10:00am-11:00am	Miarul Shop Infront	Shop	Mayamaria	Amjupi	Meherpur Sadar	Meherpur	Jashore	40	12	52	38	50	52	40	12	52	1	1	1	3
213	2019-12-06	11:30am-12:30pm	Kashem House	Farmer House	Gopalpur	Amjupi	Meherpur Sadar	Meherpur	Jashore	25	25	50	34	42	49	25	25	50	1	1	1	3
214	2019-12-06	03:30pm-04:30pm	Answar Ali House	Farmer House	Roghunathpur	Amjupi	Meherpur Sadar	Meherpur	Jashore	30	24	54	48	51	53	30	24	54	1	1	1	3
215	2019-12-06	05:30pm-07:00pm	Golam Mostofa House	Farmer House	Amjhupi	Amjupi	Meherpur Sadar	Meherpur	Jashore	59	0	59	58	39	53	240	10	250	1	1	1	3
216	2019-12-06	07:30pm-08:30pm	Moinul Tea Stall Infront	Tea-stall	Chandbil	Amjupi	Meherpur Sadar	Meherpur	Jashore	51	19	70	26	49	55	175	75	250	1	1	1	3
217	2019-12-07	10:00am-11:00am	Soriful Islam Tea Stall Infront	Tea-stall	Islamnagar	Amjupi	Meherpur Sadar	Meherpur	Jashore	18	40	58	21	52	59	18	40	58	1	1	1	3
218	2019-12-07	11:30am-12:30pm	Sukur Ali House	Farmer House	Hijuli	Amjupi	Meherpur Sadar	Meherpur	Jashore	18	23	41	22	28	37	18	23	41	1	1	1	3
219	2019-12-07	02:00pm-03:00pm	Aluddin House	Farmer House	Khoksha	Amjupi	Meherpur Sadar	Meherpur	Jashore	26	29	55	25	50	53	26	29	55	1	1	1	3
220	2019-12-07	04:00pm-05:00pm	Rasidul house	Farmer House	Alampur	Amjupi	Meherpur Sadar	Meherpur	Jashore	26	33	59	24	51	55	40	60	100	1	1	1	3
221	2019-12-07	05:30pm-07:00pm	Hasem Contactar Shop Infront	Shop	Dighirpara	Amjupi	Meherpur Sadar	Meherpur	Jashore	54	0	54	29	45	45	54	0	54	1	1	1	3
222	2019-12-07	07:20pm-09:00pm	Paiqurtola More	Road Side	Asrafpur	Amdah	Meherpur Sadar	Meherpur	Jashore	72	0	72	48	55	70	300	20	320	1	1	1	3
223	2019-12-08	10:00am-11:00am	Nasiruddin Tea Stall Infront	Tea-stall	Buriputa	Buriputa	Meherpur Sadar	Meherpur	Jashore	22	1	23	9	20	21	22	1	23	1	1	1	3
224	2019-12-08	11:30am-12:30pm	Nazimuddin House	Farmer House	Pirojpur	Pirojpur	Meherpur Sadar	Meherpur	Jashore	30	22	52	27	46	51	30	22	52	1	1	1	3
225	2019-12-08	02:00pm-03:00pm	Liton House	Farmer House	Gohorpur	Pirojpur	Meherpur Sadar	Meherpur	Jashore	22	11	33	25	32	22	22	11	33	1	1	1	3
226	2019-12-08	04:00pm-05:00pm	Ashim Electronic Infront	Shop	Baliarpur	Pirojpur	Meherpur Sadar	Meherpur	Jashore	41	10	51	40	36	42	41	10	51	1	1	1	3
227	2019-12-08	05:30pm-07:00pm	Simran Traders Infront	Shop	Gopalnagor	Monakhali	Mujibnagor	Meherpur	Jashore	72	0	72	31	65	68	250	0	250	1	1	1	3
228	2019-12-08	07:45pm-09:00pm	Akram Tea Stall Infront	Tea-stall	Amdah	Amdah	Meherpur Sadar	Meherpur	Jashore	66	4	70	36	62	67	200	25	225	1	1	1	3
229	2019-12-09	10:00am-11:00am	Tenjel Mondol House	Farmer House	Kolaidaga	Pirojpur	Meherpur Sadar	Meherpur	Jashore	27	31	58	36	39	55	27	11	38	1	1	1	3
230	2019-12-09	11:30am-12:30pm	Bablu Biswas House	Farmer House	Baradi	Pirojpur	Meherpur Sadar	Meherpur	Jashore	18	21	39	25	19	33	18	21	39	1	1	1	3
231	2019-12-09	02:30pm-03:30pm	Jamat Ali House	Farmer House	Borshibaria	Pirojpur	Meherpur Sadar	Meherpur	Jashore	36	26	62	48	38	56	36	26	62	1	1	1	3
232	2019-12-09	04:00pm-05:00pm	Singhati Bazar	Market Place	Singhati	Pirojpur	Meherpur Sadar	Meherpur	Jashore	77	0	77	65	30	69	150	0	150	1	1	1	3
233	2019-12-09	06:00pm-07:00pm	Malek Tea Stall Infront	Tea-stall	Puraton Darbespur	Pirojpur	Meherpur Sadar	Meherpur	Jashore	39	16	55	49	14	38	200	100	300	1	1	1	3
234	2019-12-10	02:30pm-03:30pm	Abdul Baten House	Farmer House	Bemanali	Godkhali	Jhikargacha	Jashore	Jashore	13	48	61	0	7	60	13	48	61	1	1	0	2
235	2019-12-10	04:00pm-05:00pm	Jalil Sheikh House	Farmer House	Beinali	Godkhali	Jhikargacha	Jashore	Jashore	9	32	41	0	4	40	9	32	41	1	1	0	2
236	2019-12-11	02:30pm-03:30pm	Rabiul Islam Tea Stall Infront	Tea-stall	Jogahati	Churmankhati	Jashore Sadar	Jashore	Jashore	25	34	59	0	3	59	30	70	100	1	1	0	2
237	2019-12-11	04:00pm-05:00pm	Kuddus Ali House	Farmer House	Gobila	Churmankhati	Jashore Sadar	Jashore	Jashore	32	37	69	0	2	69	40	60	100	1	1	0	2
238	2019-12-11	06:00pm-07:30pm	Ambottala Bazar High School Field	Market Place	Sajiali	Churmankhati	Jashore Sadar	Jashore	Jashore	85	0	85	0	2	85	300	0	300	1	1	0	2
239	2019-12-12	11:00am-12:00pm	Alamgir Tea Stall Infront	Tea-stall	Barbakpur	Godkhali	Jhikargacha	Jashore	Jashore	19	22	41	2	3	41	19	22	41	1	1	0	2
240	2019-12-12	02:00pm-03:00pm	Zahangir Alam House	Farmer House	Jhaudia	Jhikargacha	Jhikargacha	Jashore	Jashore	23	32	55	0	0	52	23	32	55	1	1	0	2
241	2019-12-12	04:00pm-05:30pm	Akter Morol House	Farmer House	Mollikpur	Jhikargacha	Jhikargacha	Jashore	Jashore	28	31	59	0	2	59	30	70	100	1	1	0	2
242	2019-12-12	06:00pm-07:00pm	Laujani Govt Primary School Field	Educational Institution	Laujani	Jhikargacha	Jhikargacha	Jashore	Jashore	64	0	64	0	2	64	250	0	250	1	1	0	2
243	2019-12-13	11:00am-12:15pm	Md Monirul Gazi House	Farmer House	Ujirpur	Pourosova	Narail Sadar	Narail	Jashore	13	25	38	0	0	38	13	25	38	1	1	0	2
244	2019-12-13	02:30pm-03:30pm	Debasis Tea Stall infront	Tea-stall	Dhopakhola	Pourosova	Narail Sadar	Narail	Jashore	42	14	56	0	5	56	42	14	56	1	1	0	2
245	2019-12-13	04:00pm-05:00pm	Zillu Biswas House	Farmer House	Kathalbaria	Maizpara	Narail Sadar	Narail	Jashore	19	38	57	0	2	57	19	38	57	1	1	0	2
246	2019-12-13	05:30pm-07:00pm	Mazipur Degree College Field	Educational Institution	Maizpara	Maizpara	Narail Sadar	Narail	Jashore	68	1	69	0	10	69	145	5	150	1	1	1	3
247	2019-12-13	07:00pm- 09:00pm	Sakat tea Stall Infront	Tea-stall	Daulatpur	Maizpara	Narail Sadar	Narail	Jashore	43	24	67	0	18	67	200	50	250	1	1	0	2
248	2019-12-14	11:00am-12:30pm	Hasem Joarder House	Farmer House	Purbo Abdalpur	Horinarayanpur	Kushtia Sadar	Kushtia	Jashore	25	24	49	14	35	47	25	24	49	1	1	1	3
249	2019-12-14	02:00pm-03:00pm	Habil Mondol House	Farmer House	Belbaradi	Horinarayanpur	Kushtia Sadar	Kushtia	Jashore	43	20	63	2	50	62	50	50	100	1	1	1	3
250	2019-12-14	04:00pm-05:30pm	Mujibor Rahaman House	Farmer House	Poschim Abdalpur	Abdalpur	Kushtia Sadar	Kushtia	Jashore	39	19	58	8	37	51	39	19	58	1	1	1	3
251	2019-12-14	05:30pm-07:00pm	Poschim Abdalpur Bazar	Market Place	Poschim Abdalpur	Abdalpur	Kushtia Sadar	Kushtia	Jashore	64	0	64	9	34	63	250	0	250	1	1	1	3
252	2019-12-15	10:00am-11:00am	Kurban Ali House	Farmer House	Bittipara	Ujanpur	Kushtia Sadar	Kushtia	Jashore	21	46	67	25	43	66	21	46	67	1	1	1	3
253	2019-12-15	11:30am-12:30pm	Anis Shop Front	Shop	Mathpara	Ujanpur	Kushtia Sadar	Kushtia	Jashore	38	21	59	17	30	58	38	21	59	1	1	1	3
254	2019-12-15	03:30pm-04:30pm	Mahammad Ali House	Farmer House	Laximpur	Ziaroti	Kushtia Sadar	Kushtia	Jashore	25	28	53	40	17	53	25	28	53	1	1	1	3
255	2019-12-15	05:30pm-07:00pm	Kamlapur Bazar (Battola)	Market Place	Kamlapur	Ziaroti	Kushtia Sadar	Kushtia	Jashore	90	0	90	76	54	81	250	0	250	1	1	1	3
256	2019-12-15	07:30pm-08:30pm	Pearpur Club More	Road Side	Piearpur	Ziaroti	Kushtia Sadar	Kushtia	Jashore	59	0	59	39	36	48	150	0	150	1	1	1	3
257	2019-12-16	11:00am-12:00pm	Ripon Joddar House	Farmer House	Karimpur	Ujangram	Kushtia Sadar	Kushtia	Jashore	22	17	39	17	31	37	22	17	39	1	0	1	2
258	2019-12-16	12:30pm-02:00pm	Eaqub Ali Tea Stall Infront	Tea-stall	Gopalpur	Abdalpur	Kushtia Sadar	Kushtia	Jashore	27	29	56	37	29	54	27	29	56	1	1	1	3
259	2019-12-16	04:00pm-05:00pm	Solimuddin Tea Stall Infront	Shop	Takimara	Bottali	Kushtia Sadar	Kushtia	Jashore	30	18	48	46	13	48	30	18	48	1	1	1	3
260	2019-12-16	05:30pm-07:00pm	Abdul Khalek Tea Stall Infront	Tea-stall	Boria	Bottali	Kushtia Sadar	Kushtia	Jashore	56	3	59	55	6	50	130	20	150	1	1	1	3
261	2019-12-18	10:00am-11:00am	Mokka Teding Infront	Shop	Bidirpur	Matikata	Godagari	Rajshahi	Rajshahi	33	0	33	8	10	30	33	0	33	1	1	1	3
262	2019-12-18	11:30am-12:30pm	Khorshed Shop Infront	Shop	Pirijpur	Matikata	Godagari	Rajshahi	Rajshahi	9	19	28	15	11	23	9	19	28	1	1	1	3
263	2019-12-18	02:00pm-03:00pm	Ripon Tea Stall Infront	Tea-stall	Susadanga	Matikata	Godagari	Rajshahi	Rajshahi	31	18	49	23	23	44	31	18	49	1	1	1	3
264	2019-12-18	04:00pm-05:00pm	Nurhossain House	Farmer House	Kalidighi	Matikata	Godagari	Rajshahi	Rajshahi	34	7	41	17	39	34	34	7	41	1	1	1	3
265	2019-12-18	05:30pm-07:00pm	Adharpara Karitas School Field	Educational Institution	Adharpara	Matikata	Godagari	Rajshahi	Rajshahi	52	3	55	20	24	53	120	30	150	1	1	1	3
266	2019-12-19	10:00am-11:00am	Rakibul Sarkar House	Farmer House	Kathalbaria	Matikata	Godagari	Rajshahi	Rajshahi	30	34	64	18	39	64	50	50	100	1	1	1	3
267	2019-12-19	11:30am-12:30pm	Rafiqul Sarkar House	Farmer House	Shekerpara	Matikata	Godagari	Rajshahi	Rajshahi	28	25	53	22	25	48	40	60	100	1	1	1	3
268	2019-12-19	3:00pm-04:00pm	Chahurul Islam House	Farmer House	Krishnobati	Matikata	Godagari	Rajshahi	Rajshahi	25	26	51	18	23	49	30	50	80	1	1	1	3
269	2019-12-19	05:30pm-07:00pm	Durga Mondir Field	Religious Establishment	Gopalpur	Matikata	Godagari	Rajshahi	Rajshahi	42	21	63	15	11	63	150	50	200	1	1	1	3
270	2019-12-19	07:30pm-08:00pm	Bosantapur Bazar	Market Place	Bosantapur	Matikata	Godagari	Rajshahi	Rajshahi	33	0	33	6	8	31	33	0	33	1	1	1	3
271	2019-12-20	11:00am-12:00pm	Younus Ali House`	Farmer House	Telcupi	Shahabajpur	Shibganj	Chapainawabganj	Rajshahi	50	9	59	15	58	59	60	40	100	1	1	1	3
272	2019-12-20	04:00pm-05:00pm	Razzak Shop Infront	Shop	Pirujpur	Shahabajpur	Shibganj	Chapainawabganj	Rajshahi	36	38	74	44	73	70	50	70	120	1	1	1	3
273	2019-12-20	05:30pm-07:00pm	Mukbul Hossain House	Farmer House	Muslimpur	Shahabajpur	Shibganj	Chapainawabganj	Rajshahi	70	9	79	22	65	79	250	100	350	1	1	1	3
274	2019-12-20	07:30pm-08:00pm	Shaidul Islam Tea Stall Infront	Tea-stall	Pardilalpur	Shahabajpur	Shibganj	Chapainawabganj	Rajshahi	59	6	65	6	49	64	150	50	200	1	1	1	3
275	2019-12-22	11:30am-12:30pm	Kalam Tea Stall Infront Hazar Digha Bazar	Market Place	Hazarbigha	Shahabajpur	Shibganj	Chapainawabganj	Rajshahi	59	0	59	17	49	59	59	0	59	1	1	1	3
276	2019-12-22	03:30pm-04:30pm	Sentu Rahaman House	Farmer House	Jogannathpur	Durlovpur	Shibganj	Chapainawabganj	Rajshahi	36	20	56	37	4	54	50	50	100	1	1	1	3
277	2019-12-22	05:30pm-07:00pm	Momin Tea Stall Infront Jagonathpur Bazar	Market Place	Jogannathpur	Durlovpur	Shibganj	Chapainawabganj	Rajshahi	79	0	79	57	2	76	250	0	250	1	1	1	3
278	2019-12-22	07:30pm-08:30pm	Durlovpur Bazar	Market Place	Durlovpur	Durlovpur	Shibganj	Chapainawabganj	Rajshahi	59	0	59	23	55	46	125	0	125	1	1	1	3
279	2019-12-23	11:30am-12:30pm	Fotema Tea Stall Infront	Tea-stall	Kosba	Horipur	Poba	Rajshahi	Rajshahi	53	3	56	37	8	56	53	3	56	1	1	1	3
280	2019-12-23	02:00pm-03:00pm	Sazu Shop Infront	Shop	Kolabona	Horipur	Poba	Rajshahi	Rajshahi	20	3	23	17	4	21	20	3	23	1	1	1	3
281	2019-12-23	04:00pm-05:00pm	Momin Shop Infront	Shop	Tengramari	Horipur	Poba	Rajshahi	Rajshahi	52	7	59	32	6	58	52	7	59	1	1	1	3
282	2019-12-23	05:30pm-07:00pm	New Nasir Seed Vander Infront	Shop	Alimpur	Horipur	Poba	Rajshahi	Rajshahi	53	6	59	20	11	59	53	6	59	1	1	1	3
283	2019-12-24	10:00am-11:00am	Roni Tea Stall Infront	Tea-stall	Jholmolia	Jiupara	Puthia	Rajshahi	Rajshahi	38	21	59	56	17	58	38	21	59	1	1	1	3
284	2019-12-24	11:30am-12:30pm	Rabiul Islam Tea Stall Infront	Tea-stall	Bihiaripara	Baneswar	Puthia	Rajshahi	Rajshahi	37	22	59	37	12	58	40	60	100	1	0	1	2
285	2019-12-24	02:30pm-03:30pm	Akkas Ali House	Farmer House	Raghurampur	Baneswar	Puthia	Rajshahi	Rajshahi	30	32	62	40	47	39	58	40	98	1	1	1	3
286	2019-12-24	04:00pm-05:00pm	Mosarof Hossain House	Farmer House	Shibpur	Baneswar	Puthia	Rajshahi	Rajshahi	26	33	59	47	39	58	40	60	100	1	1	1	3
287	2019-12-24	05:30pm-07:00pm	Namajgram Krisok Club Field	Club Field	Namajgram	Baneswar	Puthia	Rajshahi	Rajshahi	47	23	70	55	42	70	100	100	200	1	1	1	3
288	2019-12-25	10:00am-11:00am	Anisur Rahaman Tea Stall Infront	Tea-stall	Baduria	Yousufpur	Charghat	Rajshahi	Rajshahi	26	0	26	19	14	25	26	0	26	1	1	1	3
289	2019-12-25	12:00pm-01:00pm	Joshimuddin House	Farmer House	Fodikpara	Yousufpur	Charghat	Rajshahi	Rajshahi	25	2	27	20	14	24	25	2	27	1	1	1	3
290	2019-12-25	01:30pm-02:30pm	Srikhondi Brac School	Educational Institution	Srikhondi	Yousufpur	Charghat	Rajshahi	Rajshahi	13	25	38	19	34	37	13	25	38	1	1	1	3
291	2019-12-25	04:00pm-05:00pm	S.R. Library Stationary Infront, Yousufpur Bazar	Market Place	Yousufpur	Yousufpur	Charghat	Rajshahi	Rajshahi	50	0	50	30	24	48	100	0	100	1	1	1	3
292	2019-12-25	05:30pm-07:00pm	Joypur Bazar	Market Place	Joypur	Yousufpur	Charghat	Rajshahi	Rajshahi	86	0	86	64	78	82	300	0	300	1	1	1	3
293	2019-12-26	11:30am-12:30pm	Chalk Rajpur Union Parishad Field	Union Parishad Campus	Chalk Rajpu	Chalk Rajpur	Bagha	Rajshahi	Rajshahi	41	11	52	44	26	52	50	50	100	1	1	1	3
294	2019-12-26	01:00pm-02:00pm	Zia Tea Stall Infront	Tea-stall	Dadpur	Chalk Rajpur	Bagha	Rajshahi	Rajshahi	41	11	52	38	28	44	60	40	100	1	1	1	3
295	2019-12-26	02:00pm-03:00pm	Altab Tea Stall Infront Polasi Fotapur Puraton Bazar	Market Place	Polashi	Chalk Rajpur	Bagha	Rajshahi	Rajshahi	54	0	54	44	37	50	150	0	150	1	1	1	3
296	2019-12-26	04:00pm-05:00pm	Sobuj Shop Infront	Shop	Polashi Fotapur	Chalk Rajpur	Bagha	Rajshahi	Rajshahi	40	19	59	58	35	56	100	75	175	1	1	1	3
297	2019-12-27	10:00am-11:00am	Maria Union Parishad Field	Union Parishad Campus	Jatragachi	Maria	Baghmara	Rajshahi	Rajshahi	48	0	48	40	12	48	125	0	125	1	1	1	3
298	2019-12-27	02:00pm-03:00pm	Nur Mohammad House	Farmer House	Kamarbari	Maria	Baghmara	Rajshahi	Rajshahi	43	32	75	75	9	74	100	75	175	0	1	1	2
299	2019-12-27	03:30pm-04:30pm	Awami League Party Office Infront, Surjupara Bazar	Market Place	Surjupara	Maria	Baghmara	Rajshahi	Rajshahi	63	0	63	49	9	63	150	0	150	0	1	1	2
300	2019-12-27	05:00pm-06:30pm	Golam Mostofa Market , Boil Singha	Market Place	Boilsingha	Maria	Baghmara	Rajshahi	Rajshahi	59	0	59	50	4	59	150	0	150	0	1	1	2
301	2019-12-28	10:00am-11:00am	Gangopara Bazar	Market Place	Gangopara	Maria	Baghmara	Rajshahi	Rajshahi	57	1	58	41	3	50	149	1	150	0	1	1	2
302	2019-12-28	11:30am-12:30pm	M/S Roze Enter Prise Infront Shibjait Bazar	Market Place	Shibjait	Goalkhandi	Baghmara	Rajshahi	Rajshahi	54	0	54	37	0	47	125	0	125	0	1	1	2
303	2019-12-28	03:00pm-04:00pm	Zafor Islam House	Farmer House	Shibjait	Goalkhandi	Baghmara	Rajshahi	Rajshahi	51	21	72	36	2	70	70	130	200	0	1	1	2
304	2019-12-28	05:30pm-06:30pm	Battola More Taltoli Bazar	Market Place	Taltoli	Goalkhandi	Baghmara	Rajshahi	Rajshahi	56	0	56	30	3	53	150	0	150	0	1	1	2
305	2019-12-30	10:00am-11:00am	Sirajul Tea Stall Infront Osmanpur Bazar	Market Place	Osmanpur	Bisnopur	Badorganj	Rangpur	Dinajpur	69	0	69	53	1	65	150	0	150	1	1	1	3
306	2019-12-30	11:30am-12:30pm	Ruhul Amin House	Farmer House	Khagrabon	Bisnopur	Badorganj	Rangpur	Dinajpur	40	18	58	38	1	50	80	70	150	1	1	1	3
307	2019-12-30	04:00pm-05:00pm	Saidul Tea Stall Infront	Tea-stall	Putimari	Kalupara	Badorganj	Rangpur	Dinajpur	53	24	77	47	2	76	100	75	175	1	1	1	3
308	2019-12-30	05:30pm-07:00pm	Mazidul Hossain House	Farmer House	Putimari	Kalupara	Badorganj	Rangpur	Dinajpur	44	27	71	56	0	68	100	50	150	0	1	1	2
309	2019-12-31	10:00am-11:00am	Mukter Shop Infront	Shop	Kobirajpara	Kalupara	Badorganj	Rangpur	Dinajpur	39	15	54	38	0	47	39	15	54	0	1	1	2
310	2019-12-31	03:30pm-04:30pm	Shadat Hossain House	Farmer House	Guthidanga	Kalupara	Badorganj	Rangpur	Dinajpur	26	2	28	17	0	28	26	2	28	0	1	1	2
311	2020-01-01	10:00am-11:00am	Zanab Ali House	Farmer House	Balapara	Kalupara	Badorganj	Rangpur	Dinajpur	37	22	59	38	4	56	37	22	59	1	1	1	3
312	2020-01-01	12:00pm-01:00pm	Farhad Hossain House	Farmer House	Sonkorpur Jharpara	Kalupara	Badorganj	Rangpur	Dinajpur	22	30	52	47	5	49	50	75	125	1	1	1	3
313	2020-01-01	04:00pm-05:00pm	Tojammel Hossain House	Farmer House	Sonkorpur Dangorpara	Kalupara	Badorganj	Rangpur	Dinajpur	49	24	73	50	7	70	70	80	150	1	1	1	3
314	2020-01-01	05:30pm-07:00pm	Okil House	Farmer House	Kalupara Moddopara	Kalupara	Badorganj	Rangpur	Dinajpur	46	25	71	52	3	67	175	100	275	1	1	1	3
315	2020-01-02	03:30pm-04:30pm	Somonto Ray House	Farmer House	Chaklapara	Damadarpur	Badorganj	Rangpur	Dinajpur	14	27	41	18	2	41	14	27	41	1	1	1	3
316	2020-01-02	05:30pm-07:00pm	Champatoli Govt. Primary School Field	Educational Institution	Champatoli	Damadarpur	Badorganj	Rangpur	Dinajpur	91	0	91	63	5	86	300	0	300	1	1	1	3
317	2020-01-02	07:30pm-08:30pm	Toslim Uddin House	Farmer House	Tufan Para Amrulbari	Damadarpur	Badorganj	Rangpur	Dinajpur	33	31	64	45	10	58	100	125	225	1	1	1	3
318	2020-01-03	11:00am-12:00pm	Masud Rana House	Farmer House	Kajipara	Modupur	Badorganj	Rangpur	Dinajpur	35	42	77	36	18	76	100	150	250	1	1	1	3
319	2020-01-03	02:00pm-03:00pm	Sodamohon House	Farmer House	Boiragipara	Modupur	Badorganj	Rangpur	Dinajpur	35	18	53	36	13	52	50	50	100	1	1	1	3
320	2020-01-03	04:00pm-05:00pm	Zaman Shop Infront	Shop	Khamardanga	Bisnopur	Badorganj	Rangpur	Dinajpur	49	22	71	45	4	70	70	80	150	1	1	1	3
321	2020-01-03	05:30pm-07:00pm	Mosarof Hosuse	Farmer House	Untapara	Kalupara	Badorganj	Rangpur	Dinajpur	51	23	74	47	1	74	100	100	200	1	1	1	3
322	2020-01-04	10:00am-11:00am	Mokbul Hossain House	Farmer House	Chalk Polashbari	Damadarpur	Badorganj	Rangpur	Dinajpur	46	21	67	33	4	66	60	90	150	1	1	1	3
323	2020-01-04	11:30am-12:30pm	Abdus Salam House	Farmer House	Matial Para	Soyer	Taragoanj	Rangpur	Dinajpur	29	22	51	30	2	48	29	22	51	1	1	1	3
324	2020-01-04	02:00pm-03:00pm	Abbas Ali House	Farmer House	Chalk Polashbari	Damadarpur	Badorganj	Rangpur	Dinajpur	49	20	69	44	2	64	60	65	125	1	1	1	3
325	2020-01-04	03:30pm-04:30pm	Abdulbari House	Farmer House	Nayadanga	Damadarpur	Badorganj	Rangpur	Dinajpur	37	21	58	32	3	58	37	21	58	1	1	1	3
326	2020-01-04	05:30pm-07:00pm	Laldighi Bazar,Anowar Market Infront	Market Place	Kalupara Moddopara	Kalupara	Badorganj	Rangpur	Dinajpur	54	0	54	37	2	53	200	0	200	1	1	1	3
327	2020-01-05	11:00am-12:00pm	Gojoghanta Bazar	Market Place	Gojoghanta	Gojoghanta	Gongachara	Rangpur	Dinajpur	72	0	72	50	3	61	100	0	100	1	1	1	3
328	2020-01-05	01:30pm-02:30pm	Almar Bazar, Obaidul Shop Infront	Market Place	Soto Rupai	Mornia	Gongachara	Rangpur	Dinajpur	49	0	49	32	3	48	100	0	100	1	1	1	3
329	2020-01-05	03:00pm-04:00pm	Shohor Ali House	Farmer House	Bhangagora	Mornia	Gongachara	Rangpur	Dinajpur	33	25	58	46	2	48	70	80	150	1	1	1	3
330	2020-01-05	04:15pm-05:15pm	Ramdeb Govt. Primary School Field	Educational Institution	Bhangagora	Mornia	Gongachara	Rangpur	Dinajpur	39	32	71	50	0	70	80	120	200	0	1	1	2
331	2020-01-05	06:00pm-07:00pm	Baksiganj Govt. Primary School Field	Educational Institution	Boksiganj	Alam Biditor	Gongachara	Rangpur	Dinajpur	77	0	77	58	4	71	250	0	250	0	1	1	2
332	2020-01-06	12:30pm-01:30pm	Lotif House	Farmer House	Kolkandopara	Kolakando	Gongachara	Rangpur	Dinajpur	55	33	88	65	0	74	150	100	250	0	1	1	2
333	2020-01-06	06:00pm-07:30pm	Pirer Hat	Market Place	Dakkhin Kolkhando	Kolakando	Gongachara	Rangpur	Dinajpur	66	7	73	50	1	66	200	50	250	0	1	1	2
334	2020-01-07	11:30am-12:30pm	Sohidul Rahaman House	Farmer House	Purbo Kachua Fakir Para	Nehali	Gongachara	Rangpur	Dinajpur	39	10	49	42	0	40	90	60	150	1	1	1	3
335	2020-01-07	02:30pm-03:30pm	Abdul Ahad House	Farmer House	Pachim Kachua Para	Nehali	Gongachara	Rangpur	Dinajpur	43	23	66	53	0	58	70	80	150	1	1	1	3
336	2020-01-07	06:30pm-07:30pm	Nohali Union Porishad Field	Union Parishad Campus	Kachua	Nehali	Gongachara	Rangpur	Dinajpur	95	0	95	54	1	91	300	50	350	1	1	1	3
337	2020-01-08	10:00am-11:30am	Rajentopur Bazar, Fatema Traders Infront	Market Place	Pajor Vhanga	Kaounia	Kaounia	Rangpur	Dinajpur	46	3	49	21	3	48	46	3	49	1	1	1	3
338	2020-01-08	12:00pm-01:00pm	Kalir Hat	Market Place	Taluk Sahabaj	Balapara	Kaounia	Rangpur	Dinajpur	29	0	29	15	0	28	29	0	29	0	1	1	2
339	2020-01-08	03:00pm-04:30pm	Sirajul Islam Tea Stall Infront	Tea-stall	Haricharan Laskar Moddho Para	Balapara	Kaounia	Rangpur	Dinajpur	54	24	78	34	0	76	100	50	150	0	1	1	2
340	2020-01-08	06:00pm-07.30pm	Azizul House	Farmer House	Sadu	Sahidbag	Kaounia	Rangpur	Dinajpur	50	26	76	32	9	75	175	75	250	1	1	1	3
341	2020-01-09	11:00am-12:00pm	Chaitar More Bazar	Market Place	Bajemujkur	Tepamodhupur	Kaounia	Rangpur	Dinajpur	77	0	77	42	4	60	150	0	150	1	1	1	3
342	2020-01-09	01:30pm-02:30pm	Haibot Kha Nutun Bazar	Market Place	Haibotkha	Tepamodhupur	Kaounia	Rangpur	Dinajpur	70	2	72	44	9	60	90	10	100	1	1	1	3
343	2020-01-09	03:00pm-04:00pm	Bhshawnath Bazar	Market Place	Bishonath	Tepamodhupur	Kaounia	Rangpur	Dinajpur	56	1	57	38	2	48	56	1	57	1	1	1	3
344	2020-01-09	04:30pm-05:30pm	Burir Hat Bazar	Market Place	Bishonath	Tepamodhupur	Kaounia	Rangpur	Dinajpur	65	0	65	41	3	59	125	0	125	1	1	1	3
345	2020-01-09	06:00pm-07.00pm	Lalmosjid More	Road Side	Nijdorba	Tepamodhupur	Kaounia	Rangpur	Dinajpur	71	4	75	29	4	68	140	10	150	1	1	1	3
346	2020-01-10	11:30am-12:30pm	Kumardangi Durga Mondir Field	Religious Establishment	Najirdah	Najirdah	Kaounia	Rangpur	Dinajpur	45	27	72	48	3	56	70	80	150	1	1	1	3
347	2020-01-10	02:30pm-03:30pm	Mithu House	Farmer House	Bollobbishu	Sahidbag	Kaounia	Rangpur	Dinajpur	29	35	64	35	0	52	40	60	100	1	1	1	3
348	2020-01-10	04:00pm-05:00m	Arshed Tea Stall Infront	Tea-stall	Pranthechar	Sahidbag	Kaounia	Rangpur	Dinajpur	42	11	53	34	2	46	50	30	80	0	1	1	2
349	2020-01-10	06:00pm-07.00pm	Sahidbag Bazar	Market Place	Sahidbag	Sahidbag	Kaounia	Rangpur	Dinajpur	63	0	63	34	3	55	150	0	150	1	1	1	3
350	2020-01-11	11:00am-12:00pm	Abdul Hakim Uddin House	Farmer House	Pansia	Pirgacha	Pirgacha	Rangpur	Dinajpur	29	27	56	26	0	51	29	27	56	0	1	1	2
351	2020-01-11	02:00pm-03:00pm	Md Kafiluddin House	Farmer House	Anontoram Ucha Para	Pirgacha	Pirgacha	Rangpur	Dinajpur	34	22	56	38	0	49	34	22	56	0	1	1	2
352	2020-01-11	04:00pm-05:00pm	Siddik Shop Infrpnt	Shop	Taluk Ershad Nayadali	Pirgacha	Pirgacha	Rangpur	Dinajpur	30	25	55	45	0	49	30	28	58	0	1	1	2
353	2020-01-11	06:00pm-07:30pm	Chondipur Govt. Primary School Field	Educational Institution	Chandipur	Pirgacha	Pirgacha	Rangpur	Dinajpur	77	0	77	58	7	69	300	0	300	1	1	1	3
354	2020-01-12	11:00am-12:00pm	Shibdeb Badher Math	Road Side	Shibdeb	Shhaola	Pirgacha	Rangpur	Dinajpur	31	0	31	25	5	26	31	0	31	1	1	1	3
355	2020-01-12	02:00pm-03:00pm	Saheb Bazar	Market Place	Chantambul Pur	Tambulpur	Pirgacha	Rangpur	Dinajpur	42	1	43	34	1	31	42	1	43	1	1	1	3
356	2020-01-12	04:00pm-05:00pm	Nisabuddin Bazar	Market Place	Grabura	Shhaola	Pirgacha	Rangpur	Dinajpur	65	0	65	40	5	59	100	0	100	1	1	1	3
357	2020-01-12	06:00pm-07:30pm	Shhaola Union Parishad Field	Union Parishad Campus	Paotana	Shhaola	Pirgacha	Rangpur	Dinajpur	87	0	87	53	8	79	300	0	300	1	1	1	3
358	2020-01-13	10:30am-11:30am	Zalalganj Hat Mach Bazar	Market Place	Bujrukesdpur	BalarHat	Mithapukur	Rangpur	Dinajpur	53	3	56	51	0	41	53	3	56	0	1	1	2
359	2020-01-13	12:00pm-01:00pm	Teprar Bazar	Market Place	Bujru Kumarpur	BalarHat	Mithapukur	Rangpur	Dinajpur	50	0	50	36	0	43	50	0	50	0	1	1	2
360	2020-01-13	02:30pm-03:30pm	Fazlur Rahaman House	Farmer House	Kunapara	BalarHat	Mithapukur	Rangpur	Dinajpur	35	18	53	38	0	50	35	18	53	0	1	1	2
361	2020-01-13	04:00pm-05:00pm	Morden Bazar	Market Place	Dakkhin Tajpur	BalarHat	Mithapukur	Rangpur	Dinajpur	51	2	53	37	2	49	51	2	53	1	1	1	3
362	2020-01-13	06:00pm-07:30pm	Balar Hat High School Field	Educational Institution	Balar Hat	BalarHat	Mithapukur	Rangpur	Dinajpur	97	0	97	82	2	92	300	0	300	1	1	1	3
363	2020-01-14	11:00am-12:00pm	Rafiqul Islam	Farmer House	Rampara	Durgapur	Mithapukur	Rangpur	Dinajpur	33	35	68	51	0	57	50	50	100	0	1	1	2
364	2020-01-14	02:00pm-03:00pm	Mahmud Ali House	Farmer House	Sadupara	Boro Hajrotpur	Mithapukur	Rangpur	Dinajpur	27	36	63	39	7	54	40	60	100	1	1	1	3
365	2020-01-14	04:00pm-05:00pm	Motiar Rahaman House	Farmer House	Ramnathpur	Boro Hajrotpur	Mithapukur	Rangpur	Dinajpur	45	13	58	32	1	56	45	13	58	0	1	1	2
366	2020-01-14	06:00pm-07:30pm	Boro Hajrotpur Union Parishad Field	Union Parishad Campus	Nankar	Boro Hajrotpur	Mithapukur	Rangpur	Dinajpur	59	0	59	38	2	54	200	0	200	1	1	1	3
367	2020-01-15	02:00pm-03:00pm	Zahidul Islam House	Farmer House	Ghola	Ramnathpur	Pirganj	Rangpur	Dinajpur	40	23	63	51	1	54	50	50	100	1	1	1	3
368	2020-01-15	04:00pm-05:00pm	Kellar More	Road Side	Boro Mazidpur	Ramnathpur	Pirganj	Rangpur	Dinajpur	41	35	76	61	8	68	70	80	150	1	1	1	3
369	2020-01-15	06:00pm-07:30pm	Gonir Bazar	Market Place	Dariapur	Ramnathpur	Pirganj	Rangpur	Dinajpur	65	0	65	39	3	57	300	0	300	1	1	1	3
370	2020-01-16	10:30am-12:00am	Amjad Hossain House	Farmer House	Kamar Taherpur	Pirganj	Pirganj	Rangpur	Dinajpur	25	24	49	24	4	47	25	24	49	1	1	1	3
371	2020-01-16	02:00pm-03:00pm	Bangharmor Bazar	Market Place	Remnathpur	Ramnathpur	Pirganj	Rangpur	Dinajpur	33	0	33	20	0	33	33	0	33	0	1	1	2
372	2020-01-16	04:00pm-05:00pm	Kasimpur Baghar Bazar	Market Place	Kasimpur Mithipara	Mithipur	Pirganj	Rangpur	Dinajpur	49	5	54	34	3	49	80	20	100	1	1	1	3
373	2020-01-16	06:00pm-07:30pm	Makimpur Govt Primary School Field	Educational Institution	Laldighi	Pirganj	Pirganj	Rangpur	Dinajpur	68	7	75	51	3	73	225	25	250	1	1	1	3
374	2020-01-17	10:00am-11:00am	Muksudul Shop Infront	Shop	Baniapara	Mominpur	Rangpur Sadar	Rangpur	Dinajpur	20	34	54	30	0	50	30	50	80	1	1	1	3
375	2020-01-17	11:30am-12:30pm	Dulal Mia House	Farmer House	Baniapara	Mominpur	Rangpur Sadar	Rangpur	Dinajpur	51	17	68	51	7	65	70	55	125	1	1	1	3
376	2020-01-17	02:00pm-03:00pm	Rajjak House	Farmer House	Sarder Para	Mominpur	Rangpur Sadar	Rangpur	Dinajpur	42	19	61	36	2	58	42	19	61	1	1	1	3
377	2020-01-17	04:00pm-05:00pm	Olimai House	Farmer House	Dangapara	Mominpur	Rangpur Sadar	Rangpur	Dinajpur	27	27	54	24	0	48	40	60	100	1	1	1	3
378	2020-01-17	06:00pm-07:00pm	Chalilkhana Kabir Telecom Infront	Shop	Dangapara	Mominpur	Rangpur Sadar	Rangpur	Dinajpur	65	0	65	43	3	64	200	0	200	1	1	1	3
379	2020-01-18	10:30am-11:30am	Azibar Rahaman House	Farmer House	Eswshpur Nayapara	Chandanpat	Rangpur Sadar	Rangpur	Dinajpur	28	38	66	41	1	63	28	38	66	1	1	1	3
380	2020-01-18	12:00am-01:00pm	Sayed Ali House	Farmer House	Eswshpur	Chandanpat	Rangpur Sadar	Rangpur	Dinajpur	19	38	57	33	2	50	19	38	57	1	1	1	3
381	2020-01-18	02:00pm-03:00pm	Abdul Aziz House	Farmer House	Eswshpur Holder Para	Chandanpat	Rangpur Sadar	Rangpur	Dinajpur	22	18	40	27	2	40	22	18	40	1	1	1	3
382	2020-01-18	04:00pm-05:00pm	Horimondir Field Dash Para	Religious Establishment	Dash Para	Horidebpur	Rangpur Sadar	Rangpur	Dinajpur	29	14	43	20	0	43	29	14	43	1	1	1	3
383	17-10-2019	10.00am - 11.30am	Jorpara Mor	Road Side	Greda	Greda	Faridpur Sadar	Faridpur	Faridpur	33	8	41	9	6	41	33	8	41	1	1	1	3
384	17-10-2019	12.00pm - 1.00pm	Nur Islam Farmer House	Farmer House	Kafura	Greda	Faridpur Sadar	Faridpur	Faridpur	36	23	59	9	20	59	36	23	59	1	1	1	3
385	17-10-2019	3.00pm - 4.30pm	Joyna Mollare More	Road Side	Greda	Greda	Faridpur Sadar	Faridpur	Faridpur	91	0	91	19	33	72	91	0	91	1	1	1	3
386	17-10-2019	6.00pm - 7.30pm	Khalek Charmam Bazar	Market Place	Khalek Bazar	Greda	Faridpur Sadar	Faridpur	Faridpur	113	0	113	7	33	97	113	0	113	1	1	1	3
387	17-10-2019	8.00pm - 9.30pm	Bakhunda Bazar	Market Place	Bakhunda	Greda	Faridpur Sadar	Faridpur	Faridpur	73	0	73	3	15	60	73	0	73	1	1	1	3
388	18-10-2019	8.00am - 9.30am	Firoz Shek Farmer House	Farmer House	Tambul Khana	Koijuri	Faridpur Sadar	Faridpur	Faridpur	52	25	77	5	16	68	52	25	77	1	1	1	3
389	18-10-2019	10.00am - 11.00am	Belait Hossein Farmer House	Farmer House	Akuin Charpara	Koijuri	Faridpur Sadar	Faridpur	Faridpur	46	12	58	3	15	47	46	12	58	1	1	1	3
390	18-10-2019	11.30am - 12.30pm	Akuin Club Bazar	Market Place	Akuin	Koijuri	Faridpur Sadar	Faridpur	Faridpur	77	1	78	5	24	67	77	1	78	1	1	0	2
391	18-10-2019	4.00pm - 5.00pm	Peerpur Bazar	Market Place	Goal Kandi	Koijuri	Faridpur Sadar	Faridpur	Faridpur	128	3	131	0	c	108	297	3	300	1	1	1	3
392	18-10-2019	5.30pm - 7.00pm	Joair Chowrasta More	Road Side	Joair	Greda	Faridpur Sadar	Faridpur	Faridpur	127	4	131	4	24	122	296	4	300	1	1	1	3
393	18-10-2019	7.30pm - 8.30pm	Munsi Bazar	Market Place	Munsi Bazar	Greda	Faridpur Sadar	Faridpur	Faridpur	95	0	95	0	17	72	95	0	95	1	1	0	2
394	19-10-2019	8.30am - 9.30am	Khaskandi Moer	Road Side	Khaskandi	Kanaipur	Faridpur Sadar	Faridpur	Faridpur	55	4	59	0	13	49	55	4	59	1	1	0	2
395	19-10-2019	10.00am - 11.00am	Chunggir Bazar	Market Place	Kujurdia	Kanaipur	Faridpur Sadar	Faridpur	Faridpur	71	1	72	0	19	63	71	1	72	1	1	0	2
396	19-10-2019	11.30am - 12.30pm	Zafar Bazar	Market Place	Krishon Nagar	Krishno Nagar	Faridpur Sadar	Faridpur	Faridpur	89	6	95	5	47	86	89	6	95	1	1	0	2
397	19-10-2019	4.30pm - 5.30pm	Khalilpur Kacha Bazar	Market Place	Kholilpur	Krishno Nagar	Faridpur Sadar	Faridpur	Faridpur	115	1	116	2	25	101	399	1	400	1	1	1	3
398	19-10-2019	6.30pm - 7.30pm	Kanaipur Bazar	Market Place	Kanaipur	Kanaipur	Faridpur Sadar	Faridpur	Faridpur	85	0	85	3	24	72	85	0	85	1	1	1	3
399	20-10-2019	8.30am - 9.30am	Toyiub Ali Farmer House	Farmer House	Doyrampur	Mach Char	Faridpur Sadar	Faridpur	Faridpur	75	2	77	3	35	56	75	2	77	1	1	1	3
400	20-10-2019	10.00am - 11.00am	Duldi Bazar	Market Place	Duldi	Mach Char	Faridpur Sadar	Faridpur	Faridpur	84	4	88	0	9	59	84	4	88	1	1	1	3
401	20-10-2019	11.30am - 12.30pm	Rupali Farmer House	Farmer House	Chonshipur	Esan Gopalpur	Faridpur Sadar	Faridpur	Faridpur	6	35	41	1	18	33	6	35	41	1	1	1	3
402	20-10-2019	4.30pm - 5.30pm	Durgapur Primary School Field	Educational Institution	Durgapur	Esan Gopalpur	Faridpur Sadar	Faridpur	Faridpur	75	10	85	0	30	73	75	10	85	1	1	1	3
403	20-10-2019	6.00pm - 7.00pm	Lokkhi Dasher Hat	Market Place	Chok Bazar	Esan Gopalpur	Faridpur Sadar	Faridpur	Faridpur	105	5	110	15	29	95	245	5	250	1	1	1	3
404	20-10-2019	7.30pm - 8.30pm	Mohammadpur Bazar	Market Place	Mohammadpur	Char Madobdia	Faridpur Sadar	Faridpur	Faridpur	123	10	133	0	16	76	190	10	200	1	1	1	3
405	21-10-2019	8.30am - 9.30am	Mozahir Farmer House	Farmer House	Juranmollar Dangi	Char Madobdia	Faridpur Sadar	Faridpur	Faridpur	65	22	87	5	15	56	65	22	87	1	1	1	3
406	21-10-2019	10.00 am - 11.00am	Goaldangi More	Road Side	North Channel Up Porishad	North Chennel	Faridpur Sadar	Faridpur	Faridpur	71	22	93	34	30	71	71	22	93	1	1	0	3
407	21-10-2019	4.30pm - 5.30pm	Afzal Mondal More	Road Side	Afzalmondol Hat	North Chennel	Faridpur Sadar	Faridpur	Faridpur	154	18	172	38	75	146	382	18	400	1	1	1	3
408	21-10-2019	6.00pm - 7.00pm	Madhobdia Moyajuddin High School Fiend	Educational Institution	Anower Pasan	Char Madobdia	Faridpur Sadar	Faridpur	Faridpur	115	7	122	5	31	97	143	7	150	1	1	0	2
409	21-10-2019	7.30pm - 8.30pm	Kholil Mondol Bazar	Market Place	Kholil Mondol	Char Madobdia	Faridpur Sadar	Faridpur	Faridpur	93	4	97	23	29	70	93	4	97	1	1	1	3
410	22-10-2019	8.00am - 9.00am	Alia Khatun Farmer House	Farmer House	Baitul Alom	Aliabad	Faridpur Sadar	Faridpur	Faridpur	55	14	69	7	13	47	55	14	69	1	1	1	3
411	22-10-2019	9.30am - 10.30am	Bascho Molla Farmer House	Farmer House	Bil Mamudpur	Aliabad	Faridpur Sadar	Faridpur	Faridpur	32	34	66	2	18	53	32	34	66	1	1	1	3
412	22-10-2019	11.00am - 12.00pm	Mir Hossin Farmer House	Farmer House	AkabbarMolla Dungi	Aliabad	Faridpur Sadar	Faridpur	Faridpur	12	47	59	0	8	40	12	47	59	1	1	1	3
413	22-10-2019	4.00pm - 5.00pm	Shalia Farmer House	Farmer House	Purba Aliabad	Aliabad	Faridpur Sadar	Faridpur	Faridpur	22	37	59	3	15	46	22	37	59	1	1	1	3
414	22-10-2019	5.30pm - 6.30pm	Purba Aliabad More	Road Side	Purba Aliabad	Aliabad	Faridpur Sadar	Faridpur	Faridpur	54	5	59	2	25	51	54	5	59	0	0	1	1
415	22-10-2019	7.00pm - 8.00pm	Dholar More	Road Side	Dholar More	North Chennel	Faridpur Sadar	Faridpur	Faridpur	62	9	71	18	19	49	62	9	71	1	1	0	2
416	23-10-2019	8.00am - 9.00am	Dikrir Char Bazar	Market Place	C N B Ghat	Dikrir Char	Faridpur Sadar	Faridpur	Faridpur	52	7	59	10	20	42	52	7	59	1	1	1	3
417	23-10-2019	9.30am - 10.30am	Lima Farmer House	Farmer House	Purba Ram Kantopur	Ambikapur	Faridpur Sadar	Faridpur	Faridpur	40	45	85	34	42	68	40	45	85	1	1	1	3
418	23-10-2019	11.00am - 12.00pm	Asma Farmer House	Farmer House	Biswas Dangi	Ambikapur	Faridpur Sadar	Faridpur	Faridpur	21	20	41	4	24	36	21	20	41	1	1	1	3
419	23-10-2019	4.30pm - 5.30pm	Lalkhar Bazar	Market Place	Lal Khar Dangi	North Chennel	Faridpur Sadar	Faridpur	Faridpur	76	22	98	53	50	82	229	21	250	1	1	1	3
420	24-10-2019	9.00am - 10.00am	Razul Islam Farmer House	Farmer House	Satcrorasi	Sadarpur	Sadarpur	Faridpur	Faridpur	19	22	41	14	13	28	19	22	41	1	1	1	3
421	24-10-2019	11.00am - 12.00pm	Piazkhali Bazar	Market Place	Piazkhali	Dhewkhali	Sadarpur	Faridpur	Faridpur	58	7	65	23	28	46	58	7	65	1	1	1	3
422	24-10-2019	3.00pm - 4.00pm	Shamsur Molla Farmer House	Farmer House	Ram Chanra Dangi	Dhewkhali	Sadarpur	Faridpur	Faridpur	54	12	66	31	28	57	54	12	66	1	1	1	3
423	24-10-2019	5.30pm - 6.30pm	Chanrapara Bazar	Market Place	Chanra Para	Dhewkhali	Sadarpur	Faridpur	Faridpur	87	8	95	1	49	86	230	20	250	1	1	1	3
424	25-10-2019	8.30am - 9.30am	Purba Soildabi Bazar	Market Place	Purba Soildabi	Krishnapur	Sadarpur	Faridpur	Faridpur	63	5	68	9	35	57	63	5	68	1	1	1	3
425	25-10-2019	10.30am - 11.30am	Baroi Hatkhola Bazar	Market Place	Soildabi	Krishnapur	Sadarpur	Faridpur	Faridpur	74	3	77	1	35	68	74	3	77	1	1	1	3
426	25-10-2019	5.30pm - 6.30pm	Nichgram Bazar	Market Place	Nichgram	Krishnapur	Sadarpur	Faridpur	Faridpur	49	4	53	0	19	46	49	4	53	1	1	1	3
427	26-10-2019	8.30am - 9.30am	Jatrabari Bandhana Ghat More	Road Side	Jatrabari	Krishnapur	Sadarpur	Faridpur	Faridpur	51	8	59	3	17	52	51	8	59	1	1	1	3
428	26-10-2019	10.00am - 11.00am	Ghowrochar More	Road Side	Ghowro Char	Krishnapur	Sadarpur	Faridpur	Faridpur	49	28	77	3	43	56	49	28	77	1	1	1	3
429	26-10-2019	11.30am - 12.30pm	Gatha Rani Farmer House	Farmer House	Char Chandpur	Bhashan Char	Sadarpur	Faridpur	Faridpur	34	33	67	1	16	52	34	33	67	1	1	1	3
430	26-10-2019	4.30pm - 5.30pm	Karir Hat Bazar	Market Place	Karir Hat	Bhashan Char	Sadarpur	Faridpur	Faridpur	113	0	113	3	71	107	113	0	113	1	1	1	3
431	26-10-2019	6.00pm - 7.00pm	Bhashanchar Natun Bazar	Market Place	Bhashan Char	Bhashan Char	Sadarpur	Faridpur	Faridpur	74	3	77	0	46	68	74	3	77	1	1	1	3
432	26-10-2019	7.30pm - 8.30pm	Hat Krishnapur Bazar	Market Place	Krishnapur	Krishnapur	Sadarpur	Faridpur	Faridpur	53	0	53	5	35	47	53	0	53	1	1	1	3
433	27-10-2019	8.00am - 9.00am	Shahajahan Shek Farmer House	Farmer House	Amirabad	Bhashan Char	Sadarpur	Faridpur	Faridpur	17	24	41	1	18	40	17	24	41	1	1	1	3
434	27-10-2019	9.30am - 10.30am	Lotifa Farmer House	Farmer House	Azadmidha Dangi	Bhashan Char	Sadarpur	Faridpur	Faridpur	24	37	61	1	31	60	24	37	61	1	1	1	3
435	27-10-2019	11.00am - 12.00pm	Char Chandpur Bazar	Market Place	Char Chandpur	Char Bishnupur	Sadarpur	Faridpur	Faridpur	84	0	84	5	45	74	84	0	84	1	1	1	3
436	27-10-2019	4.30pm - 5.30pm	Joy Bangla Bazar	Market Place	Joy Bangla Bazar	Char Bishnupur	Sadarpur	Faridpur	Faridpur	59	0	59	2	26	57	59	0	59	1	1	1	3
437	27-10-2019	6.00pm - 7.00pm	Purba Amirabad More	Road Side	Purba Amirabad	Bhashan Char	Sadarpur	Faridpur	Faridpur	60	1	61	0	26	57	60	1	61	1	1	1	3
438	27-10-2019	7.30pm - 8.30pm	Mutok Char More	Road Side	Motok Char	Sadarpur	Sadarpur	Faridpur	Faridpur	84	0	84	1	55	79	84	0	84	1	1	1	3
439	28-10-2019	8.00am - 9.00am	Hamida Farmer House	Farmer House	Lokkhon Alipur	Pourashava Madhukhali	Madhukhali	Faridpur	Faridpur	18	29	47	0	32	40	18	29	47	1	1	1	3
440	28-10-2019	9.30am - 10.30am	Faridha Farmer House	Farmer House	Gorudardia Poschim Para	Pourashava Madhukhali	Madhukhali	Faridpur	Faridpur	14	27	41	0	15	36	14	27	41	1	1	1	3
441	28-10-2019	11.00am - 12.00pm	Makrail Bazar	Market Place	Makrail Bazar	Kamaldia	Madhukhali	Faridpur	Faridpur	114	0	114	0	43	108	114	0	114	1	1	1	3
442	28-10-2019	4.30pm - 5.30pm	Kamaldia Bazar	Market Place	Kamaldia	Kamaldia	Madhukhali	Faridpur	Faridpur	95	0	95	0	51	95	95	0	95	1	1	1	3
443	28-10-2019	6.30pm - 7.30pm	Modhupur Mohan Bazar	Market Place	Modhupur	Pourashava Madhukhali	Madhukhali	Faridpur	Faridpur	55	4	59	1	18	56	55	4	59	1	1	1	3
444	29-10-2019	8.00am - 9.00am	Rakibul Farmer house	Farmer House	Komarpur	Kamar Khali	Madhukhali	Faridpur	Faridpur	44	15	59	0	18	56	44	15	59	1	1	1	3
445	29-10-2019	10.00am - 11.00am	Royzadapur Bazar	Market Place	Rozadapur	Bagghat	Madhukhali	Faridpur	Faridpur	65	0	65	0	38	63	65	0	65	1	1	0	2
446	29-10-2019	4.30pm - 5.30pm	Chadpur More	Road Side	Chadpur	Bagghat	Madhukhali	Faridpur	Faridpur	77	0	77	0	38	73	77	0	77	1	1	1	3
447	29-10-2019	6.00pm - 7.00pm	Mitain More	Road Side	Mitain	Bagghat	Madhukhali	Faridpur	Faridpur	95	0	95	0	44	91	95	0	95	1	1	1	3
448	30-10-2019	9.00am - 10.00am	Kalibari More	Road Side	Kalibari	Manikdah	Bhanga	Faridpur	Faridpur	89	6	95	1	43	93	89	6	95	1	1	0	2
449	30-10-2019	10.30am - 11.30am	Nazma Farmer House	Farmer House	pukuria	Manikdah	Bhanga	Faridpur	Faridpur	28	13	41	0	29	39	28	13	41	1	1	0	2
450	30-10-2019	4.30pm - 5.30pm	manikdah hospital Ghate	Hospital Field	Manikdah	Manikdah	Bhanga	Faridpur	Faridpur	56	3	59	0	26	55	56	3	59	1	1	0	2
451	30-10-2019	6.00pm - 7.00pm	jahanpur Bazar	Market Place	Jahanpur	Manikdah	Bhanga	Faridpur	Faridpur	140	9	149	1	109	144	280	20	300	1	1	0	2
452	31-10-2019	8.00am - 9.00am	Hosniara farmer House	Farmer House	Hamirdi	Hamirdi	Bhanga	Faridpur	Faridpur	18	23	41	1	15	37	18	23	41	1	1	0	2
453	31-10-2019	9.30am - 10.30am	Zamal Farmer House	Farmer House	Munsurabad	Hamirdi	Bhanga	Faridpur	Faridpur	66	11	77	0	37	69	66	11	77	1	1	0	2
454	31-10-2019	11.00am - 12.00pm	Somi Farmer House	Farmer House	Madhobpur	Hamirdi	Bhanga	Faridpur	Faridpur	39	31	70	0	37	64	39	31	70	1	1	0	2
455	31-10-2019	4.00pm - 5.00pm	Hamirdi More	Road Side	Hamirdi	Hamirdi	Bhanga	Faridpur	Faridpur	63	0	63	7	44	61	63	0	63	1	1	0	2
456	31-10-2019	5.30pm - 6.30pm	Choto Muskuni Bazar	Market Place	Boro Muskuni	Hamirdi	Bhanga	Faridpur	Faridpur	96	17	113	2	77	108	230	20	250	1	1	0	2
457	31-10-2019	7.00pm - 8.00pm	laxmipur Bazar	Market Place	laxmipur	Manikdah	Bhanga	Faridpur	Faridpur	87	0	87	3	42	82	87	0	87	1	1	0	2
458	01-11-2019	8.00am - 9.00am	Shahib Ali Farmer House	Farmer House	Peerer Char	Algi	Bhanga	Faridpur	Faridpur	26	43	69	1	48	65	26	43	69	1	1	0	2
459	01-11-2019	9.30am - 10.30am	Mosharaf Farmer House	Farmer House	Mazardia	Algi	Bhanga	Faridpur	Faridpur	24	17	41	0	22	39	24	17	41	1	1	0	2
460	01-11-2019	11.00am - 12.00pm	Ibrahim Farmer House	Farmer House	Bordia	Algi	Bhanga	Faridpur	Faridpur	84	3	87	0	54	85	84	3	87	1	1	0	2
461	01-11-2019	4.00pm - 5.00pm	Biddhanondi More	Road Side	Biddhanondi	Algi	Bhanga	Faridpur	Faridpur	70	0	70	0	33	68	70	0	70	1	1	0	2
462	01-11-2019	5.30pm - 6.30pm	Aroha More	Road Side	Aroha	Algi	Bhanga	Faridpur	Faridpur	51	8	59	0	18	55	51	8	59	1	1	0	2
463	01-11-2019	7.00pm - 8.00pm	Horirhat Bazar	Market Place	Horirhat	Algi	Bhanga	Faridpur	Faridpur	77	0	77	2	33	66	77	0	77	1	1	0	2
464	02-11-2019	8.00am - 9.00am	Atul Das Farmer House	Farmer House	Pulhurpar	Azimnagar	Bhanga	Faridpur	Faridpur	21	29	50	0	32	39	21	29	50	1	1	0	2
465	02-11-2019	9.30am - 10.30am	Zakir Farmer House	Farmer House	Maligram	Chandra	Bhanga	Faridpur	Faridpur	54	0	54	1	33	50	54	0	54	1	1	0	2
466	02-11-2019	4.00pm - 5.00pm	Azimnagar Bazar	Market Place	Azimnagar	Azimnagar	Bhanga	Faridpur	Faridpur	44	39	83	0	64	77	44	39	83	1	1	0	2
467	02-11-2019	5.30pm - 6.30pm	Dewra Bazar	Market Place	Dewra	Kalamridha	Bhanga	Faridpur	Faridpur	76	1	77	0	63	73	76	1	77	1	1	0	2
468	02-11-2019	7.00pm - 8.00pm	Kalamridha Bazar	Market Place	Kalamridha	Kalamridha	Bhanga	Faridpur	Faridpur	94	1	95	0	65	83	94	1	95	1	1	1	3
469	03-11-2019	8.00am - 9.00am	Sarmin Farmer House	Farmer House	Vodra Kanda	Nasirabad	Bhanga	Faridpur	Faridpur	17	24	41	2	23	36	17	24	41	1	1	0	2
470	03-11-2019	9.30am - 10.30am	Hena Farmer House	Farmer House	Kasavanga	Nasirabad	Bhanga	Faridpur	Faridpur	37	58	95	1	54	81	37	58	95	1	1	0	2
471	03-11-2019	11.00am - 12.00pm	Anamika Farmer House	Farmer House	Chardobal	Nasirabad	Bhanga	Faridpur	Faridpur	43	24	67	0	42	56	43	24	67	1	1	0	2
472	03-11-2019	4.30 - 5.30pm	Vannatoli More	Road Side	Vannatoli	Nasirabad	Bhanga	Faridpur	Faridpur	128	3	131	2	102	125	180	20	200	1	1	0	2
473	03-11-2019	6.00pm - 7.00pm	Char Barmon More	Road Side	Charbarmon	Nasirabad	Bhanga	Faridpur	Faridpur	59	0	59	2	42	57	59	0	59	1	1	0	2
474	04-11-2019	8.00am - 9.00am	Kamola Farmer House	Farmer House	Sotasali	Chalinagar	Boalmari	Faridpur	Faridpur	36	39	75	1	44	66	36	39	75	1	1	0	2
475	04-11-2019	9.30am - 10.30am	Alfona Farmer House	Farmer House	Cdalinagar	Chalinagar	Boalmari	Faridpur	Faridpur	29	22	51	4	39	49	29	22	51	1	1	1	3
476	04-11-2019	5.00pm - 6.00pm	Hasamdia More	Road Side	Hasamdia	Chatul	Boalmari	Faridpur	Faridpur	71	0	71	0	56	66	71	0	71	1	1	0	2
477	04-11-2019	6.30pm - 7.30pm	Moyendia Bazar	Market Place	Moyendia	Poremshowrdi	Boalmari	Faridpur	Faridpur	41	0	41	0	34	40	41	0	41	1	1	0	2
478	05-11-2019	8.00am - 9.00am	Tohin Farmer House	Farmer House	Kamlapur	Pourashava	Muksudpur	Gopalgonj	Faridpur	16	25	41	4	32	58	16	25	41	1	1	1	3
479	05-11-2019	9.30am - 10.30am	Toslima Farmer House	Farmer House	Khaisa Kanda	Pourashava	Muksudpur	Gopalgonj	Faridpur	11	30	41	4	34	27	11	30	41	1	1	1	3
480	05-11-2019	11.00am - 12.00pm	Mitu Farmer House	Farmer House	Charpara	Pourashava	Muksudpur	Gopalgonj	Faridpur	18	23	41	6	36	40	18	23	41	1	1	1	3
481	05-11-2019	5.00pm - 6.00pm	Kamlapur Bazar	Market Place	Kamlapur	Pourashava	Muksudpur	Gopalgonj	Faridpur	82	13	95	4	77	86	82	13	95	1	1	0	2
482	05-11-2019	6.30pm - 7.30pm	Charpara More	Road Side	Charpara	Pourashava	Muksudpur	Gopalgonj	Faridpur	44	26	70	0	58	62	44	26	70	1	1	0	2
483	06-11-2019	8.00am - 9.00am	Amin Bazar	Market Place	Proshargati	Proshargati	Muksudpur	Gopalgonj	Faridpur	37	22	59	2	50	54	37	22	59	1	1	0	2
484	06-11-2019	9.30am - 10.30am	Shahanaj Farmer House	Farmer House	Krishnadia	Proshargati	Muksudpur	Gopalgonj	Faridpur	7	34	41	0	36	38	7	34	41	1	1	0	2
485	06-11-2019	11.00am - 12.00pm	Ashia Farmer House	Farmer House	Vakripara	Gobindapur	Muksudpur	Gopalgonj	Faridpur	30	26	56	0	45	48	30	26	56	1	1	0	2
486	06-11-2019	4.00pm - 5.00pm	Folerpara Bazar	Market Place	Folerpara	Gobindapur	Muksudpur	Gopalgonj	Faridpur	41	0	41	1	37	37	41	0	41	1	1	1	3
487	06-11-2019	5.30pm - 6.30pm	Gherakhola Bazar	Market Place	Gherakhola	Gobindapur	Muksudpur	Gopalgonj	Faridpur	113	0	113	1	97	103	230	20	250	1	1	0	2
488	06-11-2019	7.00pm - 8.00pm	Kadampur Bazar	Market Place	Kadampur	Gobindapur	Muksudpur	Gopalgonj	Faridpur	59	0	59	3	54	55	59	0	59	1	1	1	3
489	07-11-2019	8.00am - 9.00am	Rabia Farmer House	Farmer House	Diknagar	Diknagar	Muksudpur	Gopalgonj	Faridpur	16	27	43	0	31	34	16	27	43	1	1	0	2
490	07-11-2019	9.30am - 10.30am	Aysha Farmer House	Farmer House	Baksakhola	Diknagar	Muksudpur	Gopalgonj	Faridpur	25	28	53	0	50	52	25	28	53	1	1	0	2
491	07-11-2019	4.00pm - 5.00pm	Alipur Bazar	Market Place	Alipur	Diknagar	Muksudpur	Gopalgonj	Faridpur	70	7	77	0	65	68	70	7	77	1	1	0	2
492	07-11-2019	5.30pm - 6.30pm	Haludvita Bazar	Market Place	Haludvita	Batikamari	Muksudpur	Gopalgonj	Faridpur	86	0	86	1	77	79	86	0	86	1	1	0	2
493	07-11-2019	7.00pm - 8.00pm	Batikamari Bazar	Market Place	Batikamari	Batikamari	Muksudpur	Gopalgonj	Faridpur	92	0	92	1	79	79	92	0	92	1	1	1	3
494	08-11-2019	8.00am - 9.30am	Jahangir Farmer House	Farmer House	Jonasur	Mohrspur	Kashiani	Gopalgonj	Faridpur	25	16	41	1	31	36	25	16	41	1	1	0	2
495	08-11-2019	9.30am - 10.30am	Poly Farmer House	Farmer House	Doston	Mohrspur	Kashiani	Gopalgonj	Faridpur	14	36	50	1	38	44	14	36	50	1	1	0	2
496	08-11-2019	11.00am - 12.00pm	Joynagar Bazar	Market Place	Joynagar	Mohrspur	Kashiani	Gopalgonj	Faridpur	37	4	41	0	36	40	37	4	41	1	1	0	2
497	08-11-2019	4.30pm - 5.30pm	Baspur Bus Stand	Bus Stand	Bashpur	Mohrspur	Kashiani	Gopalgonj	Faridpur	38	3	41	0	34	41	38	3	41	1	1	0	2
498	09-11-2019	10.00am - 11.00am	Union Porishod Field	Union Parishad Campus	Monya	Monyna	Boalmari	Faridpur	Faridpur	59	0	59	1	51	58	59	0	59	1	1	0	2
499	09-11-2019	11.30am - 12.30pm	Jony Farmer House	Farmer House	Chardorni	Monyna	Boalmari	Faridpur	Faridpur	41	0	41	0	37	38	41	0	41	1	1	0	2
500	09-11-2019	4.30pm - 5.30pm	Khorsuti School Field	Educational Institution	Khorsuti	Monyna	Boalmari	Faridpur	Faridpur	41	0	41	0	37	41	41	0	41	1	1	0	2
501	10-11-2019	8.00am - 9.00am	Khorsuti More	Road Side	Khorsuti	Monyna	Boalmari	Faridpur	Faridpur	67	0	67	2	58	64	67	0	67	1	1	0	2
502	10-11-2019	9.30am - 10.30am	Baikir Chowrasta More	Road Side	Baikir Chowrasta	Shekhor	Boalmari	Faridpur	Faridpur	41	0	41	0	34	35	41	0	41	1	1	0	2
503	10-11-2019	4.30pm - 5.30pm	Syed Bazar	Market Place	Syedpur	Satoir	Boalmari	Faridpur	Faridpur	41	0	41	1	33	36	41	0	41	1	1	1	3
504	15-11-2019	8.00am - 9.00am	Mohishala More	Road Side	Mohishala	Satoir	Boalmari	Faridpur	Faridpur	66	4	70	1	62	66	66	4	70	1	1	1	3
505	15-11-2019	10.30am - 11.30am	Mourie Farmer House	Farmer House	Dori Shasrail	Shekhor	Boalmari	Faridpur	Faridpur	18	23	41	0	35	38	18	23	41	1	1	0	2
506	15-11-2019	4.30pm - 5.30pm	Shohosrail Bazar	Market Place	Shohosrail	Shekhor	Boalmari	Faridpur	Faridpur	59	0	59	0	47	54	59	0	59	1	1	0	2
507	15-11-2019	6.00pm - 7.00pm	Poran Borga Bazar	Market Place	Poran Borga	Shekhor	Boalmari	Faridpur	Faridpur	77	0	77	2	59	68	77	0	77	1	1	2	4
508	15-11-2019	7.30pm - 8.30pm	Vatpara Bus Stand	Bus Stand	Vatpara	Shekhor	Boalmari	Faridpur	Faridpur	58	1	59	0	47	51	58	1	59	1	1	0	2
509	16-11-2019	8.30am - 9.30am	Ruma Farmer House	Farmer House	Khalispur	Chadpur	Faridpur Sadar	Faridpur	Faridpur	32	9	41	0	25	39	32	9	41	1	1	1	3
510	16-11-2019	10.00am - 11.00am	Nazral Farmer House	Farmer House	Dupadhanga	Chadpur	Faridpur Sadar	Faridpur	Faridpur	39	28	67	0	49	58	39	28	67	1	1	0	2
511	16-11-2019	4.30pm - 5.30pm	Chadpur Bazar	Market Place	Chadpur	Chadpur	Faridpur Sadar	Faridpur	Faridpur	94	1	95	0	68	86	94	1	95	1	1	1	3
512	16-11-2019	6.00pm - 7.00pm	Jahapur Bazar	Market Place	Jahapur	Jahapur	Faridpur Sadar	Faridpur	Faridpur	114	0	114	3	81	105	230	20	250	1	1	1	3
513	16-11-2019	7.30pm - 8.30pm	Mujurdi Bazar	Market Place	Mujurdia	Dadpur	Boalmari	Faridpur	Faridpur	94	1	95	4	67	92	94	1	95	1	1	0	2
514	17-Nov-19	8:30am - 9:30am	Riaz Farmer House	Farmer House	Purbovatdi	Dadpur	Boalmari	Faridpur	Faridpur	26	15	41	0	29	38	26	15	41	1	1	0	2
515	17-Nov-19	10:00am - 11:00am	Billal Farmer House	Farmer House	Purbovatdi	Dadpur	Boalmari	Faridpur	Faridpur	19	40	59	1	39	53	19	40	59	1	1	0	2
516	17-Nov-19	11:30am - 12:30pm	Mitali Begum Farmer House	Farmer House	Taltola	Chadpur	Boalmari	Faridpur	Faridpur	14	27	41	0	23	30	14	27	41	1	1	0	2
517	17-Nov-19	4:30pm - 5:30pm	Dadpur Chitar Bazar	Market Place	Dadpur	Dadpur	Boalmari	Faridpur	Faridpur	95	0	95	0	54	86	95	0	95	1	1	0	2
518	17-Nov-19	6:30pm - 7:30pm	Kondardia Bazar	Market Place	Kondardia	Dadpur	Boalmari	Faridpur	Faridpur	150	0	150	0	91	146	230	20	250	1	1	0	2
519	18-Nov-19	4:30pm - 5:30pm	Panchwria Union Porishod Field	Union Parishad Campus	Vandaria	Panchwria	Rajbari Sadar	Rajbari	Faridpur	41	0	41	0	27	35	41	0	41	1	1	0	2
520	18-Nov-19	6:00pm - 7:00pm	Gupta Manik More	Road Side	Gupta Manik	Panchwria	Rajbari Sadar	Rajbari	Faridpur	41	0	41	0	24	37	41	0	41	1	1	0	2
521	18-Nov-19	7:30pm - 8:30pm	Konail More	Road Side	Konail	Panchwria	Rajbari Sadar	Rajbari	Faridpur	70	25	95	3	57	89	230	20	250	1	1	1	3
522	19-Nov-19	8:30am - 9:30am	Mokbul Farmer House	Farmer House	Vandaria	Panchwria	Rajbari Sadar	Rajbari	Faridpur	22	19	41	1	14	29	22	19	41	1	1	1	3
523	19-Nov-19	10:30am - 11:30am	Amin Farmer House	Farmer House	Digrir Char	Khankhanapur	Rajbari Sadar	Rajbari	Faridpur	24	35	59	0	48	55	24	35	59	1	1	0	2
524	19-Nov-19	4:30pm - 5:30pm	Samrat Nagar Bazar	Market Place	Samrat Nagar	Khankhanapur	Rajbari Sadar	Rajbari	Faridpur	98	10	108	13	72	99	180	20	200	1	1	1	3
525	19-Nov-19	6:00pm - 7:00pm	Alipur Bazar	Market Place	Alipur	Alipur	Rajbari Sadar	Rajbari	Faridpur	92	3	95	0	64	82	92	3	95	1	1	0	2
526	19-Nov-19	7:30pm - 8:30pm	Aladinpur Union Porishod Field	Union Parishad Campus	Aladipur	Alipur	Rajbari Sadar	Rajbari	Faridpur	69	8	77	5	52	72	69	8	77	1	1	1	3
527	20-Nov-19	8:30am - 9:30am	Komola Farmer House	Farmer House	Dangi Para	Ramkantapur	Rajbari Sadar	Rajbari	Faridpur	24	35	59	1	34	53	24	35	59	1	1	1	3
528	20-Nov-19	10:30am - 11:30am	Nipa Aktar Farmer House	Farmer House	Ramkantapur	Ramkantapur	Rajbari Sadar	Rajbari	Faridpur	24	31	55	1	28	49	24	31	55	1	1	1	3
529	20-Nov-19	4:30pm - 5:30pm	Ramkantapur Primary School Field	Educational Institution	Ramkantapur	Ramkantapur	Rajbari Sadar	Rajbari	Faridpur	103	2	105	0	48	80	180	20	200	1	1	0	2
530	20-Nov-19	6:00pm - 7:00pm	Ismail Shop Fornt	Shop	Ramkantapur	Ramkantapur	Rajbari Sadar	Rajbari	Faridpur	84	23	107	0	65	94	180	20	200	1	1	0	2
531	21-Nov-19	9:00am - 10:am,	Monisa Farmer House	Farmer House	Ruppur	Shahidwabpur	Rajbari Sadar	Rajbari	Faridpur	10	31	41	1	24	37	10	31	41	1	1	1	3
532	21-Nov-19	10:30am - 11:30am	Monoranjon Farmer House	Farmer House	Hat Joypur	Basantapur	Rajbari Sadar	Rajbari	Faridpur	16	25	41	0	12	24	16	25	41	1	1	0	2
533	21-Nov-19	4:30pm - 5:30pm	Katlagari Bazar	Market Place	Katlagari	Sultanpur	Rajbari Sadar	Rajbari	Faridpur	68	0	68	3	39	61	68	0	68	1	1	0	2
534	21-Nov-19	6:00pm - 7:00pm	Kalarhat Bazar	Market Place	Udaypur	Basantapur	Rajbari Sadar	Rajbari	Faridpur	108	0	108	2	68	102	230	20	250	1	1	1	3
535	21-Nov-19	7:30pm - 8:30pm	Basantapur Bus Stand	Bus Stand	Basantapur	Basantapur	Rajbari Sadar	Rajbari	Faridpur	113	0	113	1	60	90	240	10	250	1	1	1	3
536	22-Nov-19	8:30am - 9:30am	Zabida Farmer House	Farmer House	Chor Doyalbando	Choto Bakla	Goalanda	Rajbari	Faridpur	65	38	103	1	57	84	170	30	200	1	1	1	3
537	22-Nov-19	10:00am - 11:00am	Lily Farmer House	Farmer House	Hawlidheutil	Choto Bakla	Goalanda	Rajbari	Faridpur	13	28	41	0	16	29	13	28	41	1	1	1	3
538	22-Nov-19	11:30am - 12:30pm	Md Nur Islam Farmer House	Farmer House	Beparipara	Doulatdia	Goalanda	Rajbari	Faridpur	28	31	59	2	36	55	28	31	59	1	1	1	3
539	22-Nov-19	4:30pm - 5:30pm	Mowluvi Bazar	Market Place	Naldubi	Choto Bakla	Goalanda	Rajbari	Faridpur	47	12	59	3	31	48	47	12	59	1	1	1	3
540	22-Nov-19	6:00pm - 7:00pm	Choto Bakla Union Porishad Field	Union Parishad Campus	Choto Bakla	Choto Bakla	Goalanda	Rajbari	Faridpur	48	0	48	0	33	44	48	0	48	1	1	0	2
541	23-Nov-19	7:00am - 8:00am	Paskar More	Road Side	Choto Bakla	Choto Bakla	Goalanda	Rajbari	Faridpur	103	0	103	7	63	100	230	20	250	1	1	1	3
542	23-Nov-19	9:00am - 10:00am,	Sabira Farmer House	Farmer House	Mongolpur	Uzanchar	Goalanda	Rajbari	Faridpur	22	19	41	10	24	36	22	19	41	1	1	1	3
543	23-Nov-19	10:30am - 11:30am	Rihana Farmer House	Farmer House	Porbo Uzanchar	Uzanchar	Goalanda	Rajbari	Faridpur	17	33	50	0	22	37	17	33	50	1	1	0	2
544	23-Nov-19	4:30pm - 5:30pm	Hamid Mridha Bazar	Market Place	Dokkin Doulatdia	Doulatdia	Goalanda	Rajbari	Faridpur	103	0	103	8	59	97	18	20	38	1	1	1	3
545	23-Nov-19	6:00pm - 7:00pm	Samsul Mondol Bazar	Market Place	Habil Mondolpara	Uzanchar	Goalanda	Rajbari	Faridpur	116	1	117	7	68	113	230	20	250	1	1	1	3
546	23-Nov-19	7:30pm - 8:30pm	Noton Bituz Bazar	Market Place	Makon Rarpara	Goalanda	Goalanda	Rajbari	Faridpur	102	0	102	6	54	90	190	10	200	1	1	0	2
547	24-Nov-19	9:00am - 10:00am,	Mokbul Hossain Farmer House	Farmer House	Babupur	Chandani	Rajbari Sadar	Rajbari	Faridpur	20	21	41	1	21	37	20	21	41	1	1	1	3
548	24-Nov-19	10:30am - 11:30am	Khyrul Farmer House	Farmer House	Hatbaria	Khanganj	Rajbari Sadar	Rajbari	Faridpur	38	49	87	5	49	71	38	49	87	1	1	1	3
549	24-Nov-19	4:30pm - 5:30pm	Tal Tala Bazar	Market Place	Chandani	Chandani	Rajbari Sadar	Rajbari	Faridpur	66	0	66	5	32	62	66	0	66	1	1	1	3
550	24-Nov-19	6:00pm - 7:00pm	Chandani Bus Stand	Bus Stand	Chandani	Chandani	Rajbari Sadar	Rajbari	Faridpur	128	0	128	11	86	117	280	20	300	1	1	1	3
551	24-Nov-19	7:30pm - 8:30pm	Dadsi Bazar	Market Place	Akmarail	Dadsi	Rajbari Sadar	Rajbari	Faridpur	51	0	51	1	31	41	51	0	51	1	1	1	3
552	25-Nov-19	9:00 am- 10:00am	Dablu Farmer House	Farmer House	Hulail	Islampur	Balia Kandi	Rajbari	Faridpur	28	42	70	13	44	69	28	42	70	1	1	0	2
553	25-Nov-19	10: 30am - 11:30am	Narua Bazar	Market Place	Narua	Narua	Balia Kandi	Rajbari	Faridpur	113	0	113	2	72	104	230	20	250	1	1	0	2
554	25-Nov-19	4:30pm - 5:30pm	Baroli Bazar	Market Place	Nobabpur	Nobabpur	Balia Kandi	Rajbari	Faridpur	101	0	101	2	58	93	230	20	250	1	1	0	2
555	25-Nov-19	6:00pm - 7:00pm	Ramdia Bazar	Market Place	Ramdia	Blampur	Balia Kandi	Rajbari	Faridpur	71	0	71	2	37	61	71	0	71	1	1	0	2
556	25-Nov-19	7:30pm - 8:30pm	Boharpur Bus Stand	Bus Stand	Balia Kandi	Boharpur	Balia Kandi	Rajbari	Faridpur	59	0	59	1	27	50	59	0	59	1	1	0	2
557	26-Nov-19	9:00am - 10:00am,	Near Primary School	Educational Institution	Chamta	Balia Kandi	Balia Kandi	Rajbari	Faridpur	48	1	49	0	27	44	48	1	49	1	1	1	3
558	26-Nov-19	10:30am - 11:30am	Hanif Farmer House	Farmer House	Badshar Dangi	Balia Kandi	Balia Kandi	Rajbari	Faridpur	23	47	70	0	31	47	23	47	70	1	1	1	3
559	26-Nov-19	4:30pm - 5:30pm	Shamadhi Bazar	Market Place	Shomadhi	Jangal	Balia Kandi	Rajbari	Faridpur	77	0	77	3	59	73	77	0	77	1	1	1	3
560	26-Nov-19	6:00pm - 7:00pm	Jangal Bazar	Market Place	Jangal	Jangal	Balia Kandi	Rajbari	Faridpur	100	1	101	3	67	90	220	30	250	1	1	1	3
561	26-Nov-19	7:30pm - 8:30pm	Dholjani Bazar	Market Place	Dholjani	Jangal	Balia Kandi	Rajbari	Faridpur	77	0	77	6	56	72	77	0	77	1	1	1	3
562	27-Nov-19	9:00am - 10:00am,	Ratna Farmer House	Farmer House	Lokkondia	Jamalpur	Balia Kandi	Rajbari	Faridpur	17	34	51	2	36	46	17	34	51	1	1	1	3
563	27-Nov-19	10:30am - 11:30am	Olyar Farmer House	Farmer House	Charmixcami	Jamalpur	Balia Kandi	Rajbari	Faridpur	38	21	59	0	37	56	38	21	59	1	1	0	2
564	27-Nov-19	4:30pm - 5:30pm	Tetulia Kacha Bazar	Market Place	Tetulia	Boharpur	Balia Kandi	Rajbari	Faridpur	131	0	131	17	96	120	230	20	250	1	1	0	2
565	27-Nov-19	6:00pm - 7:00pm	Boharpur Rail Gate	Rail Gate	Arkandi	Boharpur	Balia Kandi	Rajbari	Faridpur	77	0	77	10	59	71	77	0	77	1	1	1	3
566	27-Nov-19	7:30pm - 8:30pm	Bani Bohar Kacha Bazar	Market Place	Bani Bohor	Bani Bohor	Rajbari Sadar	Rajbari	Faridpur	66	0	66	6	43	54	66	0	66	1	1	0	2
567	28-Nov-19	9:00am - 10:00am,	Fatima Farmer House	Farmer House	Bohorer Kalukhali	Ratandia	Kalu Khali	Rajbari	Faridpur	23	61	84	0	75	82	23	61	84	1	1	1	3
568	28-Nov-19	10:30am - 11:30am	Razaul Farmer House	Farmer House	Kalukhali Kalikapur	Kalikapur	Kalu Khali	Rajbari	Faridpur	32	17	49	2	27	39	32	17	49	1	1	0	2
569	28-Nov-19	4:30pm - 5:30pm	Harindaria Bazar	Market Place	Harinbaria	Ratandia	Kalu Khali	Rajbari	Faridpur	77	0	77	15	58	71	77	0	77	1	1	1	3
570	28-Nov-19	6:00pm - 7:00pm	Sabaria Bazar	Market Place	Sabaria Para	Ratandia	Kalu Khali	Rajbari	Faridpur	82	0	82	15	75	82	82	0	82	1	1	1	3
571	28-Nov-19	7:30pm - 8:30pm	Channi Bus Stand	Bus Stand	Bohorir	Ratandia	Kalu Khali	Rajbari	Faridpur	48	0	48	0	43	46	48	0	48	1	1	0	2
572	29-Nov-19	9:00am - 10:00am,	Aziz Farmer House	Farmer House	Morali Khula	Ratandia	Kalu Khali	Rajbari	Faridpur	24	24	48	8	42	46	24	24	48	1	1	0	2
573	29-Nov-19	4:30pm - 5:30pm	Bagzapa Bazar	Market Place	Bagzapa	Ratandia	Kalu Khali	Rajbari	Faridpur	98	3	101	8	87	95	230	20	250	1	1	0	2
574	29-Nov-19	6:00pm - 7:00pm	Rupsha Bazar	Market Place	Rupsha	Ratandia	Kalu Khali	Rajbari	Faridpur	89	0	89	5	82	85	89	0	89	1	1	1	3
575	29-Nov-19	7:30pm - 8:30pm	Ruppur More	Road Side	Ruppur	Ratandia	Kalu Khali	Rajbari	Faridpur	45	0	45	1	38	43	45	0	45	1	1	1	3
576	30-Nov-19	9:00am - 10:00am,	Parul Farmer House	Farmer House	Modapur	Madapur	Kalu Khali	Rajbari	Faridpur	27	30	57	2	41	47	27	30	57	1	1	1	3
577	30-Nov-19	10:30am - 11:30am	Limon Farmer House	Farmer House	Gandli More	Madapur	Kalu Khali	Rajbari	Faridpur	77	0	77	5	52	68	77	0	77	1	1	0	2
578	30-Nov-19	4:30pm - 5:30pm	Madapur Bazar	Market Place	Modapur	Madapur	Kalu Khali	Rajbari	Faridpur	103	0	103	0	102	102	280	20	300	1	1	1	3
579	30-Nov-19	6:30pm - 7:30pm	Gandi more Bis stand	Bus Stand	Gandli More	Madapur	Kalu Khali	Rajbari	Faridpur	58	1	59	0	52	57	58	1	59	1	1	0	2
580	01-Dec-19	4:30pm - 5:30pm	Mohonpur Bazar	Market Place	Mohonpur	Majbaria	Kalu Khali	Rajbari	Faridpur	142	0	142	11	123	130	280	20	300	1	1	0	2
581	01-Dec-19	6:00pm - 7:00pm	Sonapur More	Road Side	Kalikapur	Majbaria	Kalu Khali	Rajbari	Faridpur	58	1	59	1	39	42	58	1	59	1	1	1	3
582	01-Dec-19	7:30pm - 8:30pm	Somser More	Road Side	Majbaria	Majbaria	Kalu Khali	Rajbari	Faridpur	52	0	52	4	43	52	52	0	52	1	1	0	2
583	02-Dec-19	9:00am - 10:00am,	Anna Farmer House	Farmer House	Paikara	Boalia	Kalu Khali	Rajbari	Faridpur	20	21	41	0	15	30	20	21	41	1	1	1	3
584	02-Dec-19	10:30am - 11:30am	Shati Farmer House	Farmer House	Pastakari	Boalia	Kalu Khali	Rajbari	Faridpur	34	38	72	0	30	40	34	38	72	1	1	1	3
585	02-Dec-19	4:30pm - 5:30pm	Boalia Bazar	Market Place	Boalia	Boalia	Kalu Khali	Rajbari	Faridpur	41	0	41	0	15	30	41	0	41	1	1	1	3
586	04-Dec-19	9:00am - 10:00am,	Rezaul Farmer House	Farmer House	Chanduali	Modhuhati	Jhenaidah Sadar	Jhenaidah	Jashore	24	17	41	8	35	37	24	17	41	1	1	1	3
587	04-Dec-19	4:30pm - 5:30pm	Bazar Gopalpur	Market Place	Gopalpur	Modhuhati	Jhenaidah Sadar	Jhenaidah	Jashore	101	0	101	64	84	90	280	20	300	1	1	1	3
588	04-Dec-19	6:00pm - 7:00pm	Dugdugi Bazar	Market Place	Dagdugi	Modhuhati	Jhenaidah Sadar	Jhenaidah	Jashore	106	0	106	43	87	103	230	20	250	1	1	1	3
589	04-Dec-19	7:30pm - 8:30pm	Shaymnagar	Road Side	Shaymnagar	Modhuhati	Jhenaidah Sadar	Jhenaidah	Jashore	113	0	113	48	85	107	280	20	300	1	1	1	3
590	05-Dec-19	9:00am - 10:00am,	Enamul Farmer House	Farmer House	Sadhuhati	Sadhuhati	Jhenaidah Sadar	Jhenaidah	Jashore	33	44	77	54	60	71	33	44	77	1	1	1	3
591	05-Dec-19	10:30am - 11:30am	Golam Farmer House	Farmer House	Shaittula	Saganna	Jhenaidah Sadar	Jhenaidah	Jashore	34	25	59	27	38	51	34	25	59	1	1	1	3
592	05-Dec-19	4:30pm - 5:30pm	Boidanga Bazar	Market Place	Boidanda	Saganna	Jhenaidah Sadar	Jhenaidah	Jashore	78	3	81	50	66	79	78	3	81	1	1	1	3
593	05-Dec-19	6:30pm - 7:30pm	Rozob Ali Farmer House	Farmer House	Borai	Sadhuhati	Jhenaidah Sadar	Jhenaidah	Jashore	64	19	83	70	68	78	64	19	83	1	1	1	3
594	06-Dec-19	7:30am - 8:30am	Amtolar Bazar	Market Place	Kulchora	Dudsor	Shailkupa	Jhenaidah	Jashore	53	0	53	4	44	48	53	0	53	1	1	1	3
595	06-Dec-19	9:00am - 10:00am,	Alef Ali Farmer House	Farmer House	Bagutia	Nityanandapur	Shailkupa	Jhenaidah	Jashore	24	35	59	7	54	58	24	35	59	1	1	1	3
596	06-Dec-19	10:30am - 11:30am	Afil Farmer House	Farmer House	Vandali Para	Nityanandapur	Shailkupa	Jhenaidah	Jashore	19	40	59	0	55	57	19	40	59	1	1	1	3
597	06-Dec-19	4:00pm - 5:00pm	Gosaidanga Primare school	Educational Institution	Gosaidanga	Sarutia	Shailkupa	Jhenaidah	Jashore	47	2	49	2	48	49	47	2	49	1	1	1	3
598	06-Dec-19	5:30pm - 6:30pm	Banuganj Bazar	Market Place	Sarutia	Sarutia	Shailkupa	Jhenaidah	Jashore	67	0	67	3	55	61	67	0	67	1	1	1	3
599	06-Dec-19	7:30pm - 8:30pm	Kamar More	Road Side	Vatoi	Dudsor	Shailkupa	Jhenaidah	Jashore	44	1	45	9	38	44	44	1	45	1	1	1	3
600	07-Dec-19	9:00am - 10:00am,	Sumon Farmer House	Farmer House	Pirojpur	Baro Bazar	Kaliganj	Jhenaidah	Jashore	24	35	59	0	42	51	24	35	59	1	1	1	3
601	07-Dec-19	10:30am - 11:30am	Zamal Farmer House	Farmer House	Raghunathpur	Baro Bazar	Kaliganj	Jhenaidah	Jashore	18	23	41	1	31	37	18	23	41	1	1	1	3
602	07-Dec-19	4:30pm - 5:30pm	Somer Farmer House	Farmer House	Das Para	Baro Bazar	Kaliganj	Jhenaidah	Jashore	17	50	67	0	62	72	17	50	67	1	1	1	3
603	07-Dec-19	6:00pm - 7:00pm	Simla Rokonpur Bazar	Market Place	BoroSimla	Simla Rokonpur	Kaliganj	Jhenaidah	Jashore	112	1	113	3	94	104	280	20	300	1	1	1	3
604	07-Dec-19	7:30pm - 8:30pm	Niamatpur More	Road Side	Niamatpur	Niamatpur	Kaliganj	Jhenaidah	Jashore	79	8	87	1	64	84	79	8	87	1	1	1	3
605	08-Dec-19	9:00am - 10:00am,	Abu Bokkar Farmer House	Farmer House	Kashab Pur	Swarappur	Mahespur	Jhenaidah	Jashore	33	8	41	5	33	39	33	8	41	1	1	1	3
606	08-Dec-19	10:30am - 11:30am	Uzzal Farmer House	Farmer House	Mathura Nagor	Pantha Para	Mahespur	Jhenaidah	Jashore	30	29	59	11	38	59	30	29	59	1	1	1	3
607	08-Dec-19	4:30pm - 5:30pm	Bokulpur Bazar	Market Place	Fatehpur	Fatehpur	Mahespur	Jhenaidah	Jashore	135	0	135	95	96	131	280	20	300	1	1	1	3
608	08-Dec-19	6:00pm - 7:00pm	Vatamtula Bazar	Market Place	Purandapur	Fatehpur	Mahespur	Jhenaidah	Jashore	77	0	77	56	51	77	77	0	77	1	1	1	3
609	08-Dec-19	7:30pm - 8:30pm	Khalishpur Bazar	Market Place	Khard Khalishpur	S.B.K	Mahespur	Jhenaidah	Jashore	113	0	113	74	66	106	280	20	300	1	1	1	3
610	09-Dec-19	9:00am - 10:00am,	sharmin Farmer House	Farmer House	Bidyadharpur	Azampur	Mahespur	Jhenaidah	Jashore	41	32	73	48	25	70	41	32	73	1	1	1	3
611	09-Dec-19	10:30am - 11:30am	Joshim Farmer House	Farmer House	Alampur	Azampur	Mahespur	Jhenaidah	Jashore	50	29	79	44	31	70	50	29	79	1	1	1	3
612	09-Dec-19	4:30pm - 5:30pm	Jogihoda Uttar Para More	Road Side	Jogihoda	Fatehpur	Mahespur	Jhenaidah	Jashore	60	17	77	37	48	72	60	17	77	1	1	1	3
613	09-Dec-19	6:00pm - 7:00pm	Katakhali More	Road Side	Kakila gari	S.B.K	Mahespur	Jhenaidah	Jashore	41	0	41	29	19	40	41	0	41	1	1	1	3
614	10-Dec-19	9:00am - 10:00am,	Mofiz Farmer House	Farmer House	Goal Para	Sreepur	Sreepur	Magura	Jashore	34	37	71	4	49	54	34	37	71	1	1	1	3
615	10-Dec-19	10:30am - 11:30am	Mokul Farmer House	Farmer House	Juka	Gayeshpur	Sreepur	Magura	Jashore	55	33	88	6	78	82	55	33	88	1	1	1	3
616	10-Dec-19	4:30pm - 5:30pm	Goyeshpur Bazar	Market Place	Gayeshpur	Gayeshpur	Sreepur	Magura	Jashore	77	0	77	4	56	74	77	0	77	1	1	1	3
617	10-Dec-19	6:00pm - 7:00pm	Barishat More	Road Side	Barishat	Sreekol	Sreepur	Magura	Jashore	74	3	77	4	44	68	74	3	77	1	1	1	3
618	10-Dec-19	7:30pm - 8:30pm	Tupipara More	Road Side	Tupipara	Sreekol	Sreepur	Magura	Jashore	65	2	67	3	36	53	65	3	68	1	1	1	3
619	11-Dec-19	9:00am - 10:00am,	Sumon Kumar Farmer House	Farmer House	Paskawnia	Shatakhali	Shalikha	Magura	Jashore	20	21	41	0	27	36	20	21	41	1	1	1	3
620	11-Dec-19	10:30am - 11:30am	Samser Ali Farmer House	Farmer House	chhoyghoria	Shatakhali	Shalikha	Magura	Jashore	23	20	43	0	22	35	23	20	43	1	1	1	3
621	11-Dec-19	4:30pm - 5:30pm	Kuskhali More	Road Side	Kuskhali	Talkhali	Shalikha	Magura	Jashore	77	4	81	1	67	81	77	4	81	1	1	1	3
622	11-Dec-19	6:00pm - 7:00pm	Sundra chowrasta Bazar	Market Place	Sundra	Talkhali	Shalikha	Magura	Jashore	101	0	101	1	69	91	230	20	250	1	1	1	3
623	11-Dec-19	7:30pm - 8:30pm	Kamarbari Bazar	Market Place	Kamarbari	Hatarokhoda	Magura Sadar	Magura	Jashore	69	0	69	1	60	66	69	0	69	1	1	1	3
624	13-Dec-19	9:00am - 10:00am,	Habiba Farmer House	Farmer House	Danga Dari	Bawra	Patgram	Lalmonirhat	Dinajpur	38	22	60	55	6	49	38	22	60	0	1	1	2
625	13-Dec-19	4:30pm - 5:30pm	Zongra Bazar	Market Place	Zongra	Zongra	Patgram	Lalmonirhat	Dinajpur	82	0	82	81	3	80	82	0	82	0	1	1	2
626	13-Dec-19	6:00pm - 7:00pm	Tatultola Bazar	Market Place	Islamnagar	Zongra	Patgram	Lalmonirhat	Dinajpur	64	0	64	59	1	62	64	0	64	0	1	1	2
627	13-Dec-19	7:30pm - 8:30pm	Sofiz Hat Bazar	Market Place	Hasnabad	Bawra	Patgram	Lalmonirhat	Dinajpur	59	0	59	52	1	55	59	0	59	0	1	1	2
628	14-Dec-19	9:00am - 10:00am,	Boloram Roy Farmer House	Farmer House	Holdiibari	Sindhuna	Hatibandha	Lalmonirhat	Dinajpur	29	12	41	40	0	38	29	12	41	0	1	1	2
629	14-Dec-19	10:30am - 11:30am	Sindhuna madhopara More	Road Side	Modho Sindhuna	Sindhuna	Hatibandha	Lalmonirhat	Dinajpur	45	25	70	68	2	65	45	25	70	0	1	1	2
630	14-Dec-19	4:30pm - 5:30pm	Hatibandhah Bazar	Market Place	Sindhuna	Sindhuna	Hatibandha	Lalmonirhat	Dinajpur	108	0	108	101	0	99	230	20	250	0	1	1	2
631	14-Dec-19	6:00pm - 7:00pm	Khaner Bazar	Market Place	Modho kotir Bazar	Gotamari	Hatibandha	Lalmonirhat	Dinajpur	83	0	83	80	0	80	83	0	83	0	1	1	2
632	14-Dec-19	7:30pm - 8:30pm	Milon Bazar	Farmer House	Milon Bazar	Borokhata	Hatibandha	Lalmonirhat	Dinajpur	123	0	123	118	1	113	320	30	350	0	1	1	2
633	15-Dec-19	9:00am - 10:00am,	Abdus Samad Farmer House	Farmer House	Khal Para	Bawra	Patgram	Lalmonirhat	Dinajpur	48	55	103	97	0	92	200	50	250	0	1	1	2
634	15-Dec-19	10:30am - 11:30am	Anowar Farmer House	Market Place	Dhonirtari	Patgram	Patgram	Lalmonirhat	Dinajpur	23	16	39	39	0	39	23	16	39	0	1	1	2
635	15-Dec-19	4:30pm - 5:30pm	Koborstan Bazar	Market Place	Kobor stan	Kucholibari	Patgram	Lalmonirhat	Dinajpur	101	0	101	98	1	98	280	20	300	0	1	1	2
636	15-Dec-19	6:00pm - 7:00pm	Alauddin Bazar	Market Place	Alauddin Nagar	Zongra	Patgram	Lalmonirhat	Dinajpur	131	0	131	129	0	125	330	20	350	0	1	1	2
637	16-Dec-19	9:00am - 10:00am,	Jahidul islam Farmer House	Farmer House	Dalalpara	Fokirpara	Hatibandha	Lalmonirhat	Dinajpur	67	37	104	103	0	93	200	50	250	0	1	1	2
638	16-Dec-19	10:30am - 11:30am	Abdullah Farmer House	Farmer House	Tangjhara	Saniajan	Hatibandha	Lalmonirhat	Dinajpur	75	25	100	98	0	92	200	50	250	0	1	1	2
639	16-Dec-19	4:30pm - 5:30pm	Mondol Bazar	Market Place	Nij Shekh Sondhuri	Saniajan	Hatibandha	Lalmonirhat	Dinajpur	94	9	103	101	0	100	280	20	300	0	1	1	2
640	16-Dec-19	6:00pm - 7:00pm	Tangjhara Bazar	Market Place	Tangjhara	Saniajan	Hatibandha	Lalmonirhat	Dinajpur	136	1	137	137	2	135	335	15	350	0	1	1	2
641	16-Dec-19	7:30pm - 8:30pm	Jorapukur Bazar	Market Place	Jorapukur	Fokirpara	Hatibandha	Lalmonirhat	Dinajpur	95	0	95	95	1	93	95	0	95	0	1	1	2
642	17-Dec-19	9:00am - 10:00am,	Harun Farmer House	Farmer House	Dulapara	Borokhata	Hatibandha	Lalmonirhat	Dinajpur	52	28	80	79	0	76	200	50	250	0	1	1	2
643	17-Dec-19	10:30am - 11:30am	Tariqul Farmer House	Farmer House	Dulapara	Borokhata	Hatibandha	Lalmonirhat	Dinajpur	67	34	101	97	1	94	200	50	250	0	1	1	2
644	17-Dec-19	4:30pm - 5:30pm	Borokhata Moidhaner More	Road Side	Borokhata	Borokhata	Hatibandha	Lalmonirhat	Dinajpur	51	32	83	80	0	80	51	32	83	0	1	1	2
645	17-Dec-19	6:00pm - 7:00pm	Fokirpara Unian Porisoid Field	Union Parishad Campus	Poramanik	Fokirpara	Hatibandha	Lalmonirhat	Dinajpur	69	8	77	77	1	76	69	8	77	0	1	1	2
646	17-Dec-19	7:30pm - 8:30pm	Borokhata Bazar	Market Place	Borokhata	Borokhata	Hatibandha	Lalmonirhat	Dinajpur	143	0	143	142	0	118	310	10	320	0	1	1	2
647	18-Dec-19	9:00am - 10:00am,	Fozlul Haque Farmer House	Farmer House	Nij Shekh Sondhuri	Saniajan	Hatibandha	Lalmonirhat	Dinajpur	69	33	102	102	0	100	200	50	250	0	1	1	2
648	18-Dec-19	10:30am - 11:30am	Surujaman Farmer House	Farmer House	Coddobar	Saniajan	Hatibandha	Lalmonirhat	Dinajpur	69	34	103	101	0	96	200	70	270	0	1	1	2
649	18-Dec-19	4:30pm - 5:30pm	Mokades Nagar More	Road Side	Balapara	Saniajan	Hatibandha	Lalmonirhat	Dinajpur	66	2	68	68	0	62	66	2	68	0	1	1	2
650	18-Dec-19	6:00pm - 7:00pm	Sadur Bazar	Market Place	Guddimari	Gotamari	Hatibandha	Lalmonirhat	Dinajpur	113	0	113	112	2	108	290	10	300	0	1	1	2
651	18-Dec-19	7:30pm - 8:30pm	Saniajan Bazar	Market Place	Nij Shekh Sondhuri	Saniajan	Hatibandha	Lalmonirhat	Dinajpur	119	0	119	118	1	116	345	5	350	0	1	1	2
652	19-Dec-19	9:00am - 10:00am,	Abdul Hamid Farmer House	Farmer House	Gondukuri	Tongvanga	Hatibandha	Lalmonirhat	Dinajpur	77	28	105	97	0	92	200	50	250	0	1	1	2
653	19-Dec-19	11:00am - 12:00pm	Abdul RahmanFarmer House	Farmer House	Boroy Para	Tongvanga	Hatibandha	Lalmonirhat	Dinajpur	69	34	103	101	0	94	200	50	250	0	1	1	2
654	19-Dec-19	4:30pm - 5:30pm	Gendukuri Bazar	Market Place	Gondukuri	Tongvanga	Hatibandha	Lalmonirhat	Dinajpur	102	0	102	99	0	98	280	0	280	0	1	1	2
655	19-Dec-19	6:00pm - 7:00pm	Babur Bazar	Market Place	Baburtari	Tongvanga	Hatibandha	Lalmonirhat	Dinajpur	100	0	100	99	0	98	260	0	260	0	1	1	2
656	19-Dec-19	7:30pm - 8:30pm	Dhaklibandha Bazar	Market Place	Poscim Buse Gram	Tongvanga	Hatibandha	Lalmonirhat	Dinajpur	62	1	63	62	0	62	62	1	63	0	1	1	2
657	20-Dec-19	9:30am - 10:30am,	Akbar Farmer House	Farmer House	Burasardubi	Fokirpara	Hatibandha	Lalmonirhat	Dinajpur	95	18	113	108	1	108	220	50	270	0	1	1	2
658	20-Dec-19	11:00am - 12:00pm	Burasardubi Kanar Bazar More	Road Side	Burasardubi	Fokirpara	Hatibandha	Lalmonirhat	Dinajpur	58	45	103	100	0	101	150	100	250	0	1	1	2
659	20-Dec-19	4:30pm - 5:30pm	Roton Rai Farmer House	Farmer House	Purbo Fokirpara	Fokirpara	Hatibandha	Lalmonirhat	Dinajpur	48	40	88	85	0	79	48	40	88	0	1	1	2
660	20-Dec-19	6:00pm - 7:00pm	Najirhosen School Bazar	Market Place	Purbo Fokirpara	Fokirpara	Hatibandha	Lalmonirhat	Dinajpur	59	0	59	59	0	51	59	0	59	0	1	1	2
661	20-Dec-19	7:30pm - 8:30pm	Burasardubi Kanar Para more	Road Side	Burasardubi	Fokirpara	Hatibandha	Lalmonirhat	Dinajpur	81	9	90	89	0	88	81	9	90	0	1	1	2
662	21-Dec-19	9:00am - 10:00am,	Krisno Kumar Farmer House	Farmer House	Amjhol	Gotamari	Hatibandha	Lalmonirhat	Dinajpur	53	48	101	95	0	95	270	80	350	0	1	1	2
663	21-Dec-19	11:00am - 12:00pm	Mostofa Farmer House	Farmer House	Boncouky	Vhelaguri	Hatibandha	Lalmonirhat	Dinajpur	67	38	105	108	0	91	270	50	320	0	1	1	2
664	21-Dec-19	4:30pm - 5:30pm	Vsngra School mat Bazar	Market Place	Purbo Amjhol	Gotamari	Hatibandha	Lalmonirhat	Dinajpur	103	8	111	109	0	108	320	50	370	0	1	1	2
665	21-Dec-19	6:00pm - 7:00pm	Boterhat Bazar	Market Place	Purbo Kodhma	Vhelaguri	Hatibandha	Lalmonirhat	Dinajpur	113	0	113	102	0	99	320	30	350	0	1	1	2
666	21-Dec-19	7:30pm - 8:30pm	Materpar More	Road Side	Boncouky	Vhelaguri	Hatibandha	Lalmonirhat	Dinajpur	59	0	59	59	0	57	59	0	59	0	1	1	2
667	22-Dec-19	9:30am - 10:30am,	Roghunath Shah Farmer House	Farmer House	Cerangaw	Gotamari	Hatibandha	Lalmonirhat	Dinajpur	53	52	105	95	0	89	200	70	270	0	1	1	2
668	22-Dec-19	11:00am - 12:00pm	Promoth CondroFarmer House	Farmer House	Poseim Kodhma	Vhelaguri	Hatibandha	Lalmonirhat	Dinajpur	67	33	100	95	0	91	200	50	250	0	1	1	2
669	22-Dec-19	4:30pm - 5:30pm	Mondob Bazar	Market Place	Poseim Kodhma	Vhelaguri	Hatibandha	Lalmonirhat	Dinajpur	76	25	101	84	0	87	220	60	280	0	1	1	2
670	22-Dec-19	6:00pm - 7:00pm	Cetonar Bazar	Market Place	Moddhom Kodhma	Vhelaguri	Hatibandha	Lalmonirhat	Dinajpur	131	0	131	118	0	121	400	0	400	0	1	1	2
671	22-Dec-19	7:30pm - 8:30pm	Doy Khaowa Bazar	Market Place	Doy Khaowa	Doy Khaowa	Hatibandha	Lalmonirhat	Dinajpur	105	1	106	104	0	95	250	10	260	0	1	1	2
672	23-Dec-19	9:30am - 10:30am,	Jahidul islam Farmer House	Farmer House	Dokhin Votmari	Dokhin Votmari	Kaligong	Lalmonirhat	Dinajpur	47	56	103	102	0	97	150	100	250	0	1	1	2
673	23-Dec-19	11:00am - 12:00pm	Toful Ali Farmer House	Farmer House	Dokhin Musuroth mathate	Dokhin Musuroth mathate	Kaligong	Lalmonirhat	Dinajpur	80	27	107	101	0	96	250	50	300	0	1	1	2
674	23-Dec-19	4:30pm - 5:30pm	Pondith Para Boter more	Road Side	UttorSrodidhor Pondith Para	Votmari	Kaligong	Lalmonirhat	Dinajpur	59	54	113	111	0	108	270	80	350	0	1	1	2
675	23-Dec-19	6:00pm - 7:00pm	Vettorhat Bazar	Market Place	Votmari	Votmari	Kaligong	Lalmonirhat	Dinajpur	140	0	140	139	0	137	440	10	450	0	1	1	2
676	23-Dec-19	7:30pm - 8:30pm	Votmari Rell gate More	Road Side	Votmari	Votmari	Kaligong	Lalmonirhat	Dinajpur	61	1	62	56	0	55	61	1	62	0	1	1	2
677	24-Dec-19	9:30am - 10:30am,	Motenal Farmer House	Farmer House	Chordo Bocon Doy	Dawabari	Hatibandha	Lalmonirhat	Dinajpur	46	32	78	77	0	74	46	32	78	0	1	1	2
678	24-Dec-19	11:00am - 12:00pm	Jahpdul Islam Farmer House	Farmer House	Uttor Musuroth mathate	Modhate	Kaligong	Lalmonirhat	Dinajpur	59	46	105	98	0	88	200	80	280	0	1	1	2
679	24-Dec-19	4:30pm - 5:30pm	Chowdhorir Bazar	Market Place	Jamir Bari	Votmari	Kaligong	Lalmonirhat	Dinajpur	63	1	64	62	0	58	63	1	64	0	1	1	2
680	24-Dec-19	6:00pm - 7:00pm	Hazrania Bazar	Market Place	Sodor Para	Votmari	Kaligong	Lalmonirhat	Dinajpur	155	0	155	150	0	143	400	0	400	0	1	1	2
681	24-Dec-19	7:30pm - 8:30pm	Votmari Bazar	Market Place	Uttor Musuroth mathate	Modhate	Kaligong	Lalmonirhat	Dinajpur	138	0	138	137	0	125	400	0	400	0	1	1	2
682	25-Dec-19	9:30am - 10:30am,	Sahinur Rahman Farmer House	Farmer House	Taluk Saqkate	Modhate	Kaligong	Lalmonirhat	Dinajpur	67	16	83	76	0	77	67	16	83	0	1	1	2
683	25-Dec-19	11:00am - 12:00pm	Samiul Islam Farmer House	Farmer House	Kcsamoth Mothate Mastar para	Modhate	Kaligong	Lalmonirhat	Dinajpur	45	25	70	65	0	62	45	25	70	0	1	1	2
684	25-Dec-19	4:30pm - 5:30pm	Modhod Para Bazar	Market Place	Taluk Saqkate	Modhate	Kaligong	Lalmonirhat	Dinajpur	81	33	114	110	0	104	280	50	330	0	1	1	2
685	25-Dec-19	6:00pm - 7:00pm	Baburhat Bazar	Market Place	Kcsamoth Mothate	Modhate	Kaligong	Lalmonirhat	Dinajpur	134	0	134	126	0	127	450	0	450	0	1	1	2
686	25-Dec-19	7:30pm - 8:30pm	Dorbeser Bazar	Market Place	Taluk Saqkate	Modhate	Kaligong	Lalmonirhat	Dinajpur	94	6	100	97	1	93	330	20	350	0	1	1	2
687	26-Dec-19	9:30am - 10:30am,	Dulal Farmer House	Farmer House	Dokhin Ghonersor Adorso Para	Tusvandar	Kaligong	Lalmonirhat	Dinajpur	72	29	101	98	0	92	200	80	280	0	1	1	2
688	26-Dec-19	11:00am - 12:00pm	Shiful Islam Farmer House	Farmer House	Dokhin Ghonersor moterpor	Tusvandar	Kaligong	Lalmonirhat	Dinajpur	60	44	104	100	0	93	180	70	250	0	1	1	2
689	26-Dec-19	4:30pm - 5:30pm	Kanchonsor Kanar Bazar	Market Place	Cor kanchonsor	Tusvandar	Kaligong	Lalmonirhat	Dinajpur	113	0	113	109	0	105	350	0	350	0	1	1	2
690	26-Dec-19	6:00pm - 7:00pm	Amingong Bazar	Market Place	Dokhin Ghonersor	Tusvandar	Kaligong	Lalmonirhat	Dinajpur	140	0	140	133	0	131	400	0	400	0	1	1	2
691	26-Dec-19	7:30pm - 8:30pm	Bottolar Cerarmil More	Road Side	Paycartari	Tusvandar	Kaligong	Lalmonirhat	Dinajpur	114	0	114	112	0	98	300	0	300	0	1	1	2
692	27-Dec-19	9:30am - 10:30am,	Saidul Islam Farmer House	Farmer House	Rosulpur Pathai Tari	Bawra	Patgram	Lalmonirhat	Dinajpur	73	40	113	108	0	104	270	80	350	0	1	1	2
693	27-Dec-19	11:00am - 12:00pm	Tindro Condro Rai Farmer House	Farmer House	Nobinnagar Sorkar Para	Bawra	Patgram	Lalmonirhat	Dinajpur	46	31	77	73	0	71	46	31	77	0	1	1	2
694	27-Dec-19	4:30pm - 5:30pm	Bipen Memburtari Farmer House	Farmer House	Nobinnagar	Bawra	Patgram	Lalmonirhat	Dinajpur	75	38	113	110	0	104	170	130	300	0	1	1	2
695	27-Dec-19	6:00pm - 7:00pm	Jumur Ali Bazar	Market Place	Nobinnagar	Bawra	Patgram	Lalmonirhat	Dinajpur	113	0	113	109	0	102	320	0	320	0	1	1	2
696	27-Dec-19	7:30pm - 8:30pm	Bawra Bazar	Market Place	Nobinnagar	Bawra	Patgram	Lalmonirhat	Dinajpur	111	0	111	106	0	102	300	0	300	0	1	1	2
697	28-Dec-19	9:30am - 10:30am,	Asadul Islam Farmer House	Farmer House	Zomgram chawlar Tari	Bawra	Patgram	Lalmonirhat	Dinajpur	82	31	113	107	0	95	200	80	280	0	1	1	2
698	28-Dec-19	11:00am - 12:00pm	Torim Ali Farmer House	Farmer House	Zomgram Agduar Tari	Bawra	Patgram	Lalmonirhat	Dinajpur	68	39	107	99	0	98	200	70	270	0	1	1	2
699	28-Dec-19	4:30pm - 5:30pm	Hafizul Islam Farmer House	Farmer House	Zomgram Sorkar Tari	Bawra	Patgram	Lalmonirhat	Dinajpur	66	16	82	77	0	76	66	16	82	0	1	1	2
700	28-Dec-19	6:00pm - 7:00pm	Eidgha Mat	Road Side	Zomgram	Bawra	Patgram	Lalmonirhat	Dinajpur	105	2	107	101	0	98	240	10	250	0	1	1	2
701	29-Dec-19	9:30am - 10:30am,	Abu Bokkar Farmer House	Farmer House	Cang Cenga Pani	Bawra	Patgram	Lalmonirhat	Dinajpur	73	40	113	109	0	106	150	100	250	0	1	1	2
702	29-Dec-19	11:00am - 12:00pm	Akber Hossen Farmer House	Farmer House	Vztia Para	Bawra	Patgram	Lalmonirhat	Dinajpur	56	45	101	98	0	92	170	80	250	0	1	1	2
703	29-Dec-19	4:30pm - 5:30pm	Soreor Bazar	Market Place	Mirzar Cot	Patgram	Patgram	Lalmonirhat	Dinajpur	131	0	131	129	0	124	400	0	400	0	1	1	2
704	29-Dec-19	6:00pm - 7:00pm	Kafiz Bazar	Market Place	Mominpur	Zongra	Patgram	Lalmonirhat	Dinajpur	119	0	119	115	0	114	300	0	300	0	1	1	2
705	29-Dec-19	7:30pm - 8:30pm	Zongra Union Porishad Field	Union Parishad Campus	Zongra	Zongra	Patgram	Lalmonirhat	Dinajpur	103	0	103	101	0	99	250	0	250	0	1	1	2
706	30-Dec-19	9:30am - 10:30am,	Najrul Islam Farmer House	Farmer House	Mominpur	Zongra	Patgram	Lalmonirhat	Dinajpur	44	45	89	87	0	84	44	45	89	0	1	1	2
707	30-Dec-19	11:00am - 12:00pm	Abdul Lotuf Farmer House	Farmer House	Mominpur	Zongra	Patgram	Lalmonirhat	Dinajpur	74	26	100	100	0	96	170	80	250	0	1	1	2
708	30-Dec-19	1:30pm - 2:30pm	Najrul Islam Farmer House	Farmer House	Baskata Dayal Tari	Zongra	Patgram	Lalmonirhat	Dinajpur	65	45	110	110	0	110	100	100	200	0	1	1	2
709	30-Dec-19	4:30pm - 5:30pm	Samol Farmer House	Farmer House	Zong Sadhu Para	Zongra	Patgram	Lalmonirhat	Dinajpur	26	33	59	55	0	56	26	33	59	0	1	1	2
710	30-Dec-19	7:00pm - 8:00pm	Khonkar Bazar	Market Place	Islam Nagar	Zongra	Patgram	Lalmonirhat	Dinajpur	81	1	82	80	0	74	81	1	82	0	1	1	2
711	30-Dec-19	8:30pm - 9:30pm	Sofiual Dokan More	Road Side	Hosnabad Sonmamipur	Bawra	Patgram	Lalmonirhat	Dinajpur	52	0	52	51	0	50	52	0	52	0	1	1	2
712	31-Dec-19	9:30am - 10:30am,	Hatem Ali Farmer House	Farmer House	Engin Para	Zongra	Patgram	Lalmonirhat	Dinajpur	28	54	82	82	0	80	28	54	82	0	1	1	2
713	31-Dec-19	11:00am - 12:00pm	Mohammand Ali Farmer House	Farmer House	Bogura Para	Zongra	Patgram	Lalmonirhat	Dinajpur	64	55	119	101	0	103	200	100	300	0	1	1	2
714	31-Dec-19	4:30pm - 5:30pm	Mokcedul Farmer House	Farmer House	Nonder Ghat	Zongra	Patgram	Lalmonirhat	Dinajpur	99	39	138	135	0	136	350	50	400	0	1	1	2
715	31-Dec-19	6:00pm - 7:00pm	Coturbari Bazar	Market Place	Dhobol Guri	Zongra	Patgram	Lalmonirhat	Dinajpur	95	0	95	93	0	91	95	0	95	0	1	1	2
716	31-Dec-19	7:30pm - 8:30pm	Jonotar Bazar	Market Place	Dhobol Guri	Zongra	Patgram	Lalmonirhat	Dinajpur	157	0	157	155	0	157	400	0	400	0	1	1	2
717	01-Jan-20	9:30am - 10:30am,	Ali Hosen Farmer House	Farmer House	Telam Tari	Kucholibari	Patgram	Lalmonirhat	Dinajpur	37	48	85	82	0	82	37	48	85	0	1	1	2
718	01-Jan-20	11:00am - 12:00pm	Abdul Khalek Farmer House	Farmer House	Panbari	Kucholibari	Patgram	Lalmonirhat	Dinajpur	65	41	106	106	0	104	150	100	250	0	1	1	2
719	01-Jan-20	4:30pm - 5:30pm	Mamun Farmer House	Farmer House	Panbari	Kucholibari	Patgram	Lalmonirhat	Dinajpur	76	38	114	110	0	112	200	100	300	0	1	1	2
720	01-Jan-20	6:00pm - 7:00pm	B.D.R Bazar	Market Place	Panbari	Kucholibari	Patgram	Lalmonirhat	Dinajpur	147	0	147	143	0	144	350	0	350	0	1	1	2
721	01-Jan-20	7:30pm - 8:30pm	Kujar Bazar	Market Place	Panbari	Kucholibari	Patgram	Lalmonirhat	Dinajpur	77	0	77	75	0	77	77	0	77	0	1	1	2
722	02-Jan-20	9:30am - 10:30am,	Khairul Farmer House	Farmer House	Kucholibari Camper Par	Kucholibari	Patgram	Lalmonirhat	Dinajpur	52	50	102	99	0	100	120	130	250	0	1	1	2
723	02-Jan-20	11:00am - 12:00pm	Belal Hosen Farmer House	Farmer House	Kucholibari Munsi Para	Kucholibari	Patgram	Lalmonirhat	Dinajpur	53	32	85	85	0	85	53	32	85	0	1	1	2
724	02-Jan-20	4:30pm - 5:30pm	Mofizul Farmer House	Farmer House	Panbari	Kucholibari	Patgram	Lalmonirhat	Dinajpur	57	52	109	106	0	104	170	100	270	0	1	1	2
725	02-Jan-20	6:00pm - 7:00pm	Govt. Kucholibar Primary School Fieldi	Educational Institution	Kucholibari	Kucholibari	Patgram	Lalmonirhat	Dinajpur	144	22	166	163	0	162	400	50	450	0	1	1	2
726	02-Jan-20	7:30pm - 8:30pm	Kucholibar Union parishad Field	Union Parishad Campus	Kucholibari	Kucholibari	Patgram	Lalmonirhat	Dinajpur	152	0	152	149	0	148	400	0	400	0	1	1	2
727	03-Jan-20	9:30am - 10:30am,	Sohidul Farmer House	Farmer House	Ghonabari	Patgram	Patgram	Lalmonirhat	Dinajpur	57	45	102	101	0	100	120	100	220	0	1	1	2
728	03-Jan-20	11:00am - 12:00pm	Johoruddin Farmer House	Farmer House	prankrisno	Patgram	Patgram	Lalmonirhat	Dinajpur	63	41	104	102	0	102	150	100	250	0	1	1	2
729	03-Jan-20	6:00pm - 7:00pm	Paruliya Bazar	Market Place	Dokhin Paruliya	Patikapara	Hatibandha	Lalmonirhat	Dinajpur	131	0	131	129	0	128	400	0	400	0	1	1	2
730	03-Jan-20	7:30pm - 8:30pm	Semultala Bazar	Market Place	Dokhin Paruliya	Patikapara	Hatibandha	Lalmonirhat	Dinajpur	113	0	113	113	0	109	300	0	300	0	1	1	2
731	04-Jan-20	9:30am - 10:30am,	Muslimuddin Farmer House	Farmer House	Singimari (mistri para)	Sarudubi	Hatibandha	Lalmonirhat	Dinajpur	61	39	100	96	0	96	100	100	200	0	1	1	2
732	04-Jan-20	11:00am - 12:00pm	Alomgir Farmer House	Farmer House	Purbo Sarudubi	Borokhata	Hatibandha	Lalmonirhat	Dinajpur	78	34	112	111	0	107	170	100	270	0	1	1	2
733	04-Jan-20	4:30pm - 5:30pm	Nojrul Farmer House	Farmer House	Moddho Sarudubi	Sarudubi	Hatibandha	Lalmonirhat	Dinajpur	62	51	113	111	0	110	180	70	250	0	1	1	2
734	04-Jan-20	6:00pm - 7:00pm	Dhubni Bazar	Market Place	Moddho Dhubni	Sarudubi	Hatibandha	Lalmonirhat	Dinajpur	126	1	127	121	0	126	290	10	300	0	1	1	2
735	04-Jan-20	7:30pm - 8:30pm	Semanto Bazar	Market Place	Uttor Sarudubi	Sarudubi	Hatibandha	Lalmonirhat	Dinajpur	79	12	91	88	0	90	79	12	91	0	1	1	2
736	05-Jan-20	9:30am - 10:30am,	Joynal Abedin Farmer House	Farmer House	Moddho Dhubni	Sarudubi	Hatibandha	Lalmonirhat	Dinajpur	69	33	102	94	0	98	150	50	200	0	1	1	2
737	05-Jan-20	11:00am - 12:00pm	Mokbul Hossen Farmer House	Farmer House	Sarudubi	Sarudubi	Hatibandha	Lalmonirhat	Dinajpur	63	69	132	130	0	127	170	100	270	0	1	1	2
738	05-Jan-20	4:30pm - 5:30pm	Abdul Jolil Farmer House	Farmer House	Dokkhin Guddimari	Sarudubi	Hatibandha	Lalmonirhat	Dinajpur	79	52	131	127	0	126	250	100	350	0	1	1	2
739	05-Jan-20	6:00pm - 7:00pm	Hajiz More	Road Side	Uttor Dhubni	Sarudubi	Hatibandha	Lalmonirhat	Dinajpur	118	5	123	121	0	117	300	10	310	0	1	1	2
740	05-Jan-20	7:30pm - 8:30pm	DigherHat Bazar	Market Place	Sarudubi	Sarudubi	Hatibandha	Lalmonirhat	Dinajpur	122	0	122	119	0	118	300	0	300	0	1	1	2
741	06-Jan-20	9:30am - 10:30am,	Ziaur Rahman Farmer House	Farmer House	kethkibari	Nawdabas	Hatibandha	Lalmonirhat	Dinajpur	78	23	101	98	0	97	150	100	250	0	1	1	2
742	06-Jan-20	11:00am - 12:00pm	Mohammad Ali Farmer House	Farmer House	Dholay (mia para)	Nawdabas	Hatibandha	Lalmonirhat	Dinajpur	76	37	113	111	0	110	250	100	350	0	1	1	2
743	06-Jan-20	4:30pm - 5:30pm	Khaja Moimonudin Farmer House	Farmer House	Poscim Dholay (Mia para)	Nawdabas	Hatibandha	Lalmonirhat	Dinajpur	77	25	102	97	0	102	200	50	250	0	1	1	2
744	06-Jan-20	6:00pm - 7:00pm	Pagler Bazar	Market Place	Kseamoth Dholay	Nawdabas	Hatibandha	Lalmonirhat	Dinajpur	109	0	109	107	0	106	270	0	270	0	1	1	2
745	06-Jan-20	7:30pm - 8:30pm	Member Bazar	Market Place	Poscim Dholay	Nawdabas	Hatibandha	Lalmonirhat	Dinajpur	90	0	90	87	0	88	90	0	90	0	1	1	2
746	07-Jan-20	9:30am - 10:30am,	Sofiqul Islam Farmer House	Farmer House	Uttor Becondoy	Dawabari	Hatibandha	Lalmonirhat	Dinajpur	56	26	82	82	0	78	56	26	82	0	1	1	2
747	07-Jan-20	11:00am - 12:00pm	Emdadul Haque Farmer House	Farmer House	Poscom Becondoy	Dawabari	Hatibandha	Lalmonirhat	Dinajpur	68	9	77	77	0	76	68	9	77	0	1	1	2
748	07-Jan-20	4:30pm - 5:30pm	Akber Ali Farmer House	Farmer House	Khordo Becondoy	Dawabari	Hatibandha	Lalmonirhat	Dinajpur	44	60	104	98	0	93	100	150	250	0	1	1	2
749	07-Jan-20	6:00pm - 7:00pm	Ghunti Bazar	Market Place	Purbo Becondoy	Dawabari	Hatibandha	Lalmonirhat	Dinajpur	105	0	105	104	0	104	250	0	250	0	1	1	2
750	07-Jan-20	7:30pm - 8:30pm	D.S telpamer more	Road Side	Uttor Holdibari	Sindhuna	Hatibandha	Lalmonirhat	Dinajpur	113	0	113	111	0	109	300	0	300	0	1	1	2
751	08-Jan-20	9:30am - 10:30am,	Anam Hossen Farmer House	Farmer House	Poscim Kasiram	Tusvandar	Kaligong	Lalmonirhat	Dinajpur	59	46	105	104	0	103	150	100	250	0	1	1	2
752	08-Jan-20	11:00am - 12:00pm	Robiul Islam Farmer House	Farmer House	Poscim Kasiram	Tusvandar	Kaligong	Lalmonirhat	Dinajpur	41	49	90	89	0	88	41	49	90	0	1	1	2
753	08-Jan-20	4:30pm - 5:30pm	Mjamia Madrasha Mat	Educational Institution	Kasiram	Tusvandar	Kaligong	Lalmonirhat	Dinajpur	85	24	109	108	0	107	200	100	300	0	1	1	2
754	08-Jan-20	6:00pm - 7:00pm	Chowpati More	Road Side	Sorotidhar	Votmari	Kaligong	Lalmonirhat	Dinajpur	65	12	77	71	0	72	65	12	77	0	1	1	2
755	08-Jan-20	7:30pm - 8:30pm	Tusvandar High School mat	Educational Institution	Tusvandar Sodor	Tusvandar	Kaligong	Lalmonirhat	Dinajpur	106	0	106	104	0	103	250	0	250	0	1	1	2
756	09-Jan-20	9:30am - 10:30am,	Gojer Farmer House	Farmer House	Barinogor	Kakina	Kaligong	Lalmonirhat	Dinajpur	45	14	59	59	0	58	45	14	59	0	1	1	2
757	09-Jan-20	11:00am - 12:00pm	Somon Farmer House	Farmer House	Kanconsor	Tusvandar	Kaligong	Lalmonirhat	Dinajpur	43	34	77	61	0	70	43	34	77	0	1	1	2
758	09-Jan-20	4:30pm - 5:30pm	Dullar Bazar	Market Place	Kanconsor	Tusvandar	Kaligong	Lalmonirhat	Dinajpur	77	11	88	89	0	87	77	11	88	0	1	1	2
759	09-Jan-20	6:00pm - 7:00pm	Murgir Farm More	Road Side	Talukbari Nogor	Tusvandar	Kaligong	Lalmonirhat	Dinajpur	82	0	82	79	0	80	82	0	82	0	1	1	2
760	10-Jan-20	9:30am - 10:30am,	Sofiqul Islam Farmer House	Farmer House	Taluk Polasi	Polasi	Adithmari	Lalmonirhat	Dinajpur	39	38	77	77	0	75	39	38	77	0	1	1	2
761	10-Jan-20	11:00am - 12:00pm	Bemol Farmer House	Farmer House	Taluk Polasi	Polasi	Adithmari	Lalmonirhat	Dinajpur	79	26	105	100	0	103	200	50	250	0	1	1	2
762	10-Jan-20	4:30pm - 5:30pm	Abdul Malik Farmer House	Farmer House	UttorTaluk Polasi	Polasi	Adithmari	Lalmonirhat	Dinajpur	61	16	77	83	0	76	61	16	77	0	1	1	2
763	10-Jan-20	6:00pm - 7:00pm	Tepa Polasi Govt. Rrimari School Mat	Educational Institution	Taluk Polasi	Polasi	Adithmari	Lalmonirhat	Dinajpur	129	3	132	122	0	128	340	10	350	0	1	1	2
764	10-Jan-20	7:30pm - 8:30pm	Woptha Bazar	Market Place	Dokhin Gopal Rai	Kakina	Kaligong	Lalmonirhat	Dinajpur	102	0	102	100	0	97	250	0	250	0	1	1	2
765	11-Jan-20	9:30am - 10:30am,	Monju Alam	Farmer House	Tepapolasi	Polasi	Adithmari	Lalmonirhat	Dinajpur	68	32	100	94	0	96	100	100	200	0	1	1	2
766	11-Jan-20	11:00am - 12:00pm	Abdul Kader Farmer House	Farmer House	Modopur	Polasi	Adithmari	Lalmonirhat	Dinajpur	54	35	89	79	0	84	54	35	89	0	1	1	2
767	11-Jan-20	4:30pm - 5:30pm	Delour Farmer House	Farmer House	Modopur	Polasi	Adithmari	Lalmonirhat	Dinajpur	57	45	102	94	0	95	100	100	200	0	1	1	2
768	11-Jan-20	6:00pm - 7:00pm	Namori UECO College Field	Educational Institution	Nomori	Polasi	Adithmari	Lalmonirhat	Dinajpur	149	0	149	140	0	146	450	0	450	0	1	1	2
769	11-Jan-20	7:30pm - 8:30pm	Kodomtola Bazar	Market Place	Modopur	Polasi	Adithmari	Lalmonirhat	Dinajpur	74	14	88	78	0	84	74	14	88	0	1	1	2
770	12-Jan-20	9:30am - 10:30am,	Ajahan Farmer House	Farmer House	Ramdev	Polasi	Adithmari	Lalmonirhat	Dinajpur	75	30	105	93	0	102	150	100	250	0	1	1	2
771	12-Jan-20	11:00am - 12:00pm	Monjom Ali Farmer House	Farmer House	Namari (Dolapara)	Polasi	Adithmari	Lalmonirhat	Dinajpur	39	50	89	82	0	89	39	50	89	0	1	1	2
772	12-Jan-20	4:30pm - 5:30pm	Ancar Farmer House	Farmer House	Dokhin Balapara	Moish Khoca	Adithmari	Lalmonirhat	Dinajpur	55	31	86	76	0	83	55	31	86	0	1	1	2
773	12-Jan-20	6:00pm - 7:00pm	Moishkhocha School and College Field	Educational Institution	Baraghoria	Moish Khoca	Adithmari	Lalmonirhat	Dinajpur	140	0	140	130	0	136	400	0	400	0	1	1	2
774	12-Jan-20	7:30pm - 8:30pm	Kacari Bazar	Market Place	Kacari (Aragi dewduba)	Bhadai	Adithmari	Lalmonirhat	Dinajpur	101	0	101	98	0	97	200	0	200	0	1	1	2
775	13-Jan-20	9:30am - 10:30am,	Babur Bazar	Market Place	Kanthcssor Para	Sarpukur	Adithmari	Lalmonirhat	Dinajpur	78	0	78	74	0	74	78	0	78	0	1	1	2
776	13-Jan-20	11:00am - 12:00pm	Hasan Ali Farmer House	Farmer House	Kharubaj	Sarpukur	Adithmari	Lalmonirhat	Dinajpur	67	35	102	100	0	101	150	100	250	0	1	1	2
777	13-Jan-20	4:30pm - 5:30pm	Bodien Farmer House	Farmer House	Sobdol	Sarpukur	Adithmari	Lalmonirhat	Dinajpur	58	50	108	104	0	103	100	100	200	0	1	1	2
778	13-Jan-20	6:00pm - 7:00pm	Tepar Bazar	Market Place	Tepar Bazar	Sarpukur	Adithmari	Lalmonirhat	Dinajpur	167	0	167	163	0	162	350	0	350	0	1	1	2
779	13-Jan-20	7:30pm - 8:30pm	Milon Bazar	Market Place	Kharubaj	Sarpukur	Adithmari	Lalmonirhat	Dinajpur	82	0	82	82	0	78	82	0	82	0	1	1	2
780	14-Jan-20	9:30am - 10:30am,	Asadul IHaque Farmer House	Farmer House	Beltari	Velabari	Adithmari	Lalmonirhat	Dinajpur	68	36	104	100	0	99	150	100	250	0	1	1	2
781	14-Jan-20	11:00am - 12:00pm	Dildah Farmer House	Farmer House	Morisbari	Velabari	Adithmari	Lalmonirhat	Dinajpur	54	32	86	86	0	80	54	32	86	0	1	1	2
782	14-Jan-20	4:30pm - 5:30pm	Abdul Halim Farmer House	Farmer House	Salmara	Velabari	Adithmari	Lalmonirhat	Dinajpur	69	33	102	100	0	99	100	100	200	0	1	1	2
783	14-Jan-20	6:00pm - 7:00pm	Velabari Bazar	Market Place	Velabari	Velabari	Adithmari	Lalmonirhat	Dinajpur	154	0	154	151	0	150	350	0	350	0	1	1	2
784	14-Jan-20	7:30pm - 8:30pm	Amena Bazar	Market Place	Velabari	Velabari	Adithmari	Lalmonirhat	Dinajpur	125	0	125	119	0	118	270	0	270	0	1	1	2
785	15-Jan-20	9:30am - 10:30am,	Muksudur Rahman Farmer House	Farmer House	Polasi Dewduba	Polasi	Adithmari	Lalmonirhat	Dinajpur	69	15	84	79	0	78	69	15	84	0	1	1	2
786	15-Jan-20	11:00am - 12:00pm	Abdul Lotif Farmer House	Farmer House	Sordar Para	Moish Khoca	Adithmari	Lalmonirhat	Dinajpur	40	34	74	70	0	72	40	34	74	0	1	1	2
787	15-Jan-20	4:30pm - 5:30pm	Mojibor Rahman Farmer House	Farmer House	Araji Dewduba	Bhadai	Adithmari	Lalmonirhat	Dinajpur	82	24	106	105	0	104	150	100	250	0	1	1	2
788	15-Jan-20	6:00pm - 7:00pm	Giovt Vadhai Primary School Fleld	Educational Institution	Vadhai	Bhadai	Adithmari	Lalmonirhat	Dinajpur	142	7	149	146	0	147	280	20	300	0	1	1	2
789	15-Jan-20	7:30pm - 8:30pm	Sojib Bazar	Market Place	Vadhai	Bhadai	Adithmari	Lalmonirhat	Dinajpur	104	0	104	102	0	101	200	0	200	0	1	1	2
790	16-Jan-20	9:30am - 10:30am,	Brindronath Farmer House	Farmer House	Sarpukur	Sarpukur	Adithmari	Lalmonirhat	Dinajpur	67	19	86	84	0	86	67	19	86	0	1	1	2
791	16-Jan-20	11:00am - 12:00pm	Antu Mia Farmer House	Farmer House	Sarpukur	Sarpukur	Adithmari	Lalmonirhat	Dinajpur	60	61	121	118	0	117	150	100	250	0	1	1	2
792	16-Jan-20	4:30pm - 5:30pm	Nur Nobi Farmer House	Farmer House	Taluk Harati	Taluk Harati	Lalmonirhat Sadar	Lalmonirhat	Dinajpur	60	43	103	101	0	98	100	100	200	0	1	1	2
793	16-Jan-20	6:00pm - 7:00pm	Saftibari Bazar	Market Place	Namatari	Saftabari	Adithmari	Lalmonirhat	Dinajpur	122	0	122	118	0	116	116	0	116	0	1	1	2
794	16-Jan-20	7:30pm - 8:30pm	Chowpate Bazar	Market Place	Sarpukur (chawpati)	Saftabari	Adithmari	Lalmonirhat	Dinajpur	70	7	77	71	0	73	73	7	80	0	1	1	2
795	17-Jan-20	9:30am - 10:30am,	Mukur Condro Farmer House	Farmer House	Boro Komlabari	Komlabari	Adithmari	Lalmonirhat	Dinajpur	82	23	105	101	0	100	150	50	200	0	1	1	2
796	17-Jan-20	11:00am - 12:00pm	Ajijur Islam Farmer House	Farmer House	Soto Komlabari	Komlabari	Adithmari	Lalmonirhat	Dinajpur	37	40	77	75	0	73	37	40	77	0	1	1	2
797	17-Jan-20	4:30pm - 5:30pm	Nurjjaman Farmer House	Farmer House	Taluk Dulai	Velabari	Adithmari	Lalmonirhat	Dinajpur	74	45	119	109	0	104	150	100	250	0	1	1	2
798	17-Jan-20	6:00pm - 7:00pm	Kalistan Bazar	Market Place	Soto Komlabari	Komlabari	Adithmari	Lalmonirhat	Dinajpur	149	0	149	145	0	143	350	0	350	0	1	1	2
799	17-Jan-20	7:30pm - 8:30pm	Komlabari Union Porisad Bazar	Market Place	Boro Komlabari	Komlabari	Adithmari	Lalmonirhat	Dinajpur	95	0	95	93	0	89	95	0	95	0	1	1	2
800	18-Jan-20	9:30am - 10:30am,	Sayel Ali Farmer House	Farmer House	Senpara	Harti	Lalmonirhat Sadar	Lalmonirhat	Dinajpur	62	38	100	94	0	95	100	100	200	0	1	1	2
801	18-Jan-20	11:00am - 12:00pm	Mustafa Kamal Farmer House	Farmer House	Sorolkha	Sarpukur	Adithmari	Lalmonirhat	Dinajpur	39	42	81	77	0	79	39	42	81	0	1	1	2
802	18-Jan-20	4:30pm - 5:30pm	Morshed Alom Farmer House	Farmer House	Adithmari (poswcim para)	Bhadai	Adithmari	Lalmonirhat	Dinajpur	63	40	103	102	0	99	150	100	250	0	1	1	2
803	18-Jan-20	6:00pm - 7:00pm	Burir Bazar	Market Place	Bosintari	Bhadai	Adithmari	Lalmonirhat	Dinajpur	101	1	102	99	0	97	245	5	250	0	1	1	2
804	18-Jan-20	7:30pm - 8:30pm	Alu Stor Bazar	Market Place	Borobari	Bhadai	Adithmari	Lalmonirhat	Dinajpur	64	20	84	77	0	82	64	20	84	0	1	1	2
805	21/11/2019	9:30 AM - 11:00 AM	Uttan of Hamidur Rahaman	Farmer house	Mohismary	Dausu	Baliadangi	Thakurgaon	Dinajpur	32	47	79	75	76	77	32	47	79	1	1	1	3
806	21/11/2019	11:50 AM - 1:05 PM	Uttan of Israil House	Farmer house	Boldher	Bhano	Baliadangi	Thakurgaon	Dinajpur	37	33	70	70	70	58	37	33	70	1	1	1	3
807	21/11/2019	3:00 PM -4:40 PM	Uttan of Abdul Latif	Farmer house	Brishampur	Bhano	Baliadangi	Thakurgaon	Dinajpur	18	38	56	56	56	49	18	38	56	1	1	1	3
808	22/11/2019	9:45 AM - 11:25 AM	Baldar Durga Mondir	Religious Establishment	Baldar	Barpalaash Bari	Baliadangi	Thakurgaon	Dinajpur	32	42	74	55	55	67	32	42	74	1	1	1	3
809	22/11/2019	2:05 PM -3:15 PM	Barbari Masque	Religious Establishment	Kasidanga	Barbari	Baliadangi	Thakurgaon	Dinajpur	57	12	69	51	69	63	57	12	69	1	1	1	3
810	22/11/2019	4:05 PM - 5:30 PM	Radhar Digi	Market place	Radhar Digi	Barbari	Baliadangi	Thakurgaon	Dinajpur	62	8	70	61	58	52	62	8	70	1	1	1	3
811	22/11/2019	6:00 PM -7:10 PM	Reatnay Bogulabari School	Educational Institution	School Hat	Amjankoor	Baliadangi	Thakurgaon	Dinajpur	103	5	108	94	102	108	103	5	108	1	1	1	3
812	22/11/2019	7:00 PM -8:30 PM	Dangi Bazar	Market place	Goal Kari	Barbari	Baliadangi	Thakurgaon	Dinajpur	101	2	103	95	102	94	101	2	103	1	1	1	3
813	23/11/2019	9:40 AM -11:05 AM	Uttan of Mojibor House	Farmer house	Mohismary	Dausu	Baliadangi	Thakurgaon	Dinajpur	25	29	54	44	54	48	25	29	54	1	1	1	3
814	23/11/2019	11:40 AM - 1:00 PM	Uttan of Mojaffor House	Farmer house	Chandoncha hat	Nekmarad	Ranisankail	Thakurgaon	Dinajpur	18	40	58	54	58	57	18	40	58	1	1	1	3
815	23/11/2019	2:40 Pm - 3:55 PM	Uttan of Atikur House	Farmer house	Faridpur	Nekmarad	Ranisankail	Thakurgaon	Dinajpur	28	45	73	68	73	58	28	45	73	1	1	1	3
816	23/11/2019	4:20 PM - 5:40 PM	Uttan of Abdul Kader	Farmer house	Balia	Kasipur	Ranisankail	Thakurgaon	Dinajpur	44	38	82	73	82	81	44	38	82	1	1	1	3
817	23/11/2019	6:30 - 7:40 PM	Nekmarad Union Porishad Field	Union Parishad Campus	Bhabonando pur	Nekmarad	Ranisankail	Thakurgaon	Dinajpur	88	6	94	70	78	68	88	6	94	1	1	1	3
818	24/11/2019	10:00 AM - 11:30 AM	Uttan of Najma	Farmer house	Amjuan	Bachor	Ranisankail	Thakurgaon	Dinajpur	42	41	83	57	71	72	42	41	83	1	1	1	3
819	24/11/2019	1:05 PM - 2:30 PM	Uttan of Rumi House	Farmer house	Chopra	Bachor	Ranisankail	Thakurgaon	Dinajpur	30	21	51	48	50	48	30	21	51	1	1	1	3
820	24/11/2019	2:40 PM -4:00 PM	uttan of Rabiul House	Farmer house	Gogor	Lehemba	Ranisankail	Thakurgaon	Dinajpur	30	43	73	58	66	63	30	43	73	1	1	1	3
821	24/11/2019	5:00 PM - 6:00 PM	Uttan of Dulal House	Farmer house	Sarlurpara	Lehemba	Ranisankail	Thakurgaon	Dinajpur	32	21	53	42	48	47	32	21	53	1	1	1	3
822	24/11/2019	6:30 PM - 7:30 PM	Mardangi Bazar	Market place	Mardangi	Nandua	Ranisankail	Thakurgaon	Dinajpur	122	4	126	105	99	103	300	50	350	1	1	1	3
823	25/11/2019	10:30 AM - 11:30 PM	Uttan of Shatanu House	Farmer house	Tagoria	Nandua	Ranisankail	Thakurgaon	Dinajpur	30	32	62	54	62	62	30	32	62	1	1	1	3
824	25/11/2019	12:15 PM - 1:25 PM	Font of tea-stall	Tea-stall	Coligon	Hossaingaon	Ranisankail	Thakurgaon	Dinajpur	59	20	79	62	60	69	59	20	79	1	1	1	3
825	25/11/2019	3:00 PM - 4:15 PM	Uttan of Rabiul House	Farmer house	Raultragon	Hossaingaon	Ranisankail	Thakurgaon	Dinajpur	25	58	83	70	62	83	25	58	83	1	1	1	3
826	25/11/2019	5:10 PM - 6:40 PM	Dhalpukur Bazar	Market place	Jagdol	Kasipur	Ranisankail	Thakurgaon	Dinajpur	126	3	129	108	108	115	410	10	420	1	1	1	3
827	26/11/2019	10:30 AM- 11:45 PM	Uttan of Shalam House	Farmer house	Gorgoan	Pirganj	Pirganj	Thakurgaon	Dinajpur	51	36	87	77	83	85	51	36	87	1	1	1	3
828	26/11/2019	12:00PM -1:00 PM	Uttan of Anamul House	Farmer house	Gojtha	Pirganj	Pirganj	Thakurgaon	Dinajpur	52	31	83	76	76	77	52	31	83	1	1	1	3
829	26/11/2019	4:00 PM - 5:00 PM	Uttan of Moslem House	Farmer house	Sanaua	Bhomrada	Pirganj	Thakurgaon	Dinajpur	31	23	54	51	51	48	31	23	54	1	1	1	3
830	26/11/2019	5:40 PM - 7:00 PM	Lohagora Bazar	Market place	Lohagora	Bhomrada	Pirganj	Thakurgaon	Dinajpur	119	6	125	108	112	112	310	10	320	1	1	1	3
831	27/11/2019	10: AM - 11:10 AM	Uttan of Dity House	Farmer house	Patuapara	Hajipur	Pirganj	Thakurgaon	Dinajpur	25	46	71	64	71	71	25	46	71	1	1	1	3
832	27/11/2019	12:05 PM - 1:00 PM	Side of tea-stall	Tea-stall	Kistopur	Hajipur	Pirganj	Thakurgaon	Dinajpur	33	41	74	65	70	72	33	41	74	1	1	1	3
833	27/11/2019	1:10 PM - 2:30 PM	Uttan of Abdur Rashid House	Farmer house	Akanno Pur	Hajipur	Pirganj	Thakurgaon	Dinajpur	19	37	56	49	54	54	19	37	56	1	1	1	3
834	27/11/2019	4:00 PM - 5:00 PM	Uttan of Sumon House	Farmer house	Boadanga	Seengaon	Pirganj	Thakurgaon	Dinajpur	29	34	63	57	63	60	29	34	63	1	1	1	3
835	27/11/2019	6:00 PM -7:10 PM	Faterlat Bazar	Market place	Bealdahi	Seengaon	Pirganj	Thakurgaon	Dinajpur	120	2	122	121	121	118	300	10	310	1	1	1	3
836	28/11/2019	9:30 AM - 11:00 AM	Uttan of Joydeb House	Farmer house	Ghitob	Khongaon	Pirganj	Thakurgaon	Dinajpur	41	13	54	54	54	53	41	13	54	1	1	1	3
837	28/11/2019	12:00 PM -1:00 PM	Uttan of Shajedur House	Farmer house	Kasha Moddho Para	Kosaranganj	Pirganj	Thakurgaon	Dinajpur	25	21	46	45	41	44	25	21	46	1	1	1	3
838	28/11/2019	4:00 PM - 5:00 PM	Uttan of Abdur Rahim House	Farmer house	Dangipur	Daulatpur	Pirganj	Thakurgaon	Dinajpur	14	30	44	44	43	43	14	30	44	1	1	1	3
839	28/11/2019	5:30 PM - 6:30 PM	Brishampur Bazar	Market place	Brisham Pur	Daulatpur	Pirganj	Thakurgaon	Dinajpur	83	3	86	81	78	83	83	3	86	1	1	1	3
840	29/11/2019	9:30 AM-11:54 AM	Uttan of Moklachur House	Farmer house	Godagari	Seengaon	Pirganj	Thakurgaon	Dinajpur	36	22	58	58	55	56	36	22	58	1	1	1	3
841	29/11/2019	11:30 AM -12:30 PM	Uttan of tapon House	Farmer house	Maitani	Jabr Hat	Pirganj	Thakurgaon	Dinajpur	35	16	51	48	45	51	35	16	51	1	1	1	3
842	29/11/2019	2:45 PM - 3:50 PM	Uttan of Siddik House	Farmer house	Chandaria	Jabr Hat	Pirganj	Thakurgaon	Dinajpur	33	18	51	51	47	51	33	18	51	1	1	1	3
843	29/11/2019	4:10 PM - 5:10 PM	School Field	Educational Institution	Amirpara	Jabr Hat	Pirganj	Thakurgaon	Dinajpur	44	10	54	53	27	47	44	10	54	1	1	1	3
844	29/11/2019	6:00 PM - 7:00 PM	Bichchuna Union Porishad Field	Union Parishad Campus	Bichchuna	Bichchuna	Pirganj	Thakurgaon	Dinajpur	90	0	90	84	79	85	420	0	420	1	1	1	3
845	29/11/2019	7:10 PM -8:10 PM	School Field	Educational Institution	Jogenathpur	Bichchuna	Pirganj	Thakurgaon	Dinajpur	80	0	80	74	64	74	80	0	80	1	1	1	3
846	30/11/2019	10:AM -11:00AM	Uttan of Mostafa House	Farmer house	Munshipara	Deveepur	Thakurgaon Sadar	Thakurgaon	Dinajpur	18	17	35	33	31	35	18	17	35	1	1	1	3
847	30/11/2019	12:00 PM -1:00 PM	Uttan of Monoranjon House	Farmer house	Kalishakuri	Deveepur	Thakurgaon Sadar	Thakurgaon	Dinajpur	22	19	41	41	22	41	22	19	41	1	1	1	3
848	30/11/2019	4:00 PM - 5:00 PM	Uttan of Bazaru House	Farmer house	Shaidia	Balia	Thakurgaon Sadar	Thakurgaon	Dinajpur	19	21	40	33	7	40	19	21	40	1	1	1	3
849	30/11/2019	5:30 PM - 6:30 PM	Jatia Bazar	Market place	Shukhan Pukuri	Shukhanpukuri	Thakurgaon Sadar	Thakurgaon	Dinajpur	95	5	100	98	78	98	275	5	280	1	1	1	3
850	30/11/2019	7:05 PM - 8:05 PM	Adarsho Bazar	Market place	Choto Balia	Balia	Thakurgaon Sadar	Thakurgaon	Dinajpur	104	0	104	91	79	104	320	0	320	1	1	1	3
851	2019-01-12	10:30 AM - 11:30 PM	Kashidanga Bazar	Market place	Maligoan	Jamalpur	Thakurgaon Sadar	Thakurgaon	Dinajpur	40	0	40	38	36	40	40	0	40	1	1	1	3
852	2019-01-12	11:30 AM -12:30 PM	Vacotgazi Bazar	Market place	Vacotgazi	Jamalpur	Thakurgaon Sadar	Thakurgaon	Dinajpur	40	0	40	34	40	40	40	0	40	1	1	1	3
853	2019-01-12	1:30 PM - 2:30 PM	Side of tea-stall	Tea-stall	Mohibasi	Rahimanpur	Thakurgaon Sadar	Thakurgaon	Dinajpur	25	28	53	53	53	53	25	28	53	1	1	1	3
854	2019-01-12	3:00 PM -4:00 PM	Uttan of Ataur House	Farmer house	Krishnopur	Rahimanpur	Thakurgaon Sadar	Thakurgaon	Dinajpur	21	28	49	49	39	49	21	28	49	1	1	1	3
855	2019-01-12	6: 00 PM - 7:20 PM	Fashadangi Bazar	Market place	Fashadangi	Mohammedpur	Thakurgaon Sadar	Thakurgaon	Dinajpur	110	2	112	103	102	108	278	2	280	1	1	1	3
856	2019-02-12	9:00 AM - 10:30 AM	Uttan of Indramohan House	Farmer house	Chilarang	Chilarang	Thakurgaon Sadar	Thakurgaon	Dinajpur	22	37	59	59	59	59	22	37	59	1	1	1	3
857	2019-02-12	11:15 AM - 12:30 AM	Uttan of Nurnobi House	Farmer house	Chilarang	Chilarang	Thakurgaon Sadar	Thakurgaon	Dinajpur	29	25	54	45	54	49	29	25	54	1	1	1	3
858	2019-02-12	3:00 PM - 4:20 PM	Uttan of Roficul House	Farmer house	Khilefa Para	Akhanagar	Thakurgaon Sadar	Thakurgaon	Dinajpur	22	47	69	62	66	69	22	47	69	1	1	1	3
859	2019-02-12	5:30 PM - 6:30 PM	Guajura Bazar	Market place	Jhargoan	Akhanagar	Thakurgaon Sadar	Thakurgaon	Dinajpur	77	1	78	67	72	78	77	1	78	1	1	1	3
860	2019-02-12	6:50 PM- 8:00 PM	Akhanagar Bazar	Market place	Kishamot	Chilarang	Thakurgaon Sadar	Thakurgaon	Dinajpur	111	0	111	96	102	109	400	0	400	1	1	1	3
861	2019-03-12	9:30 AM - 10:40 AM	Field of Village Moktob	Religious Establishment	Modhupur	Ruhia	Thakurgaon Sadar	Thakurgaon	Dinajpur	28	13	41	35	39	41	28	13	41	1	1	1	3
862	2019-03-12	11:20 AM - 12:30 PM	Uttan of Sabbir House	Farmer house	Shanihari	Ruhia West	Thakurgaon Sadar	Thakurgaon	Dinajpur	24	17	41	32	35	40	24	17	41	1	1	1	3
863	2019-03-12	1:30 PM- 2:30 PM	Side of tea-stall	Tea-stall	Karikoshal Goan	Ruhia West	Thakurgaon Sadar	Thakurgaon	Dinajpur	43	23	66	32	61	66	43	23	66	1	1	1	3
864	2019-03-12	3:00 PM - 4:05 PM	Uttan of Binoy House	Farmer house	Modhupur	Ruhia	Thakurgaon Sadar	Thakurgaon	Dinajpur	25	45	70	52	64	68	25	45	70	1	1	1	3
865	2019-03-12	7:00 PM - 8:00 PM	Field of Village Moktob	Market place	Modhupur	Ruhia	Thakurgaon Sadar	Thakurgaon	Dinajpur	127	0	127	119	112	127	210	0	210	1	1	1	3
866	2019-04-12	9:30 AM - 10:30 AM	Field of Mondir	Religious Establishment	Shantiram Para	Salandar	Thakurgaon Sadar	Thakurgaon	Dinajpur	26	14	40	36	29	40	26	14	40	1	1	1	3
867	2019-04-12	11:40 AM - 1:00 PM	Side of tea-stall	Tea-stall	Jamripara	Salandar	Thakurgaon Sadar	Thakurgaon	Dinajpur	17	24	41	35	37	40	17	24	41	1	1	1	3
868	2019-04-12	4:00 PM - 5:20 PM	Uttan of Ashar Uddin	Farmer house	Agpara	Akcha	Thakurgaon Sadar	Thakurgaon	Dinajpur	19	21	40	32	31	40	19	21	40	1	1	1	3
869	2019-04-12	6:00 PM - 7:30 PM	Farabari Mondir Field	Religious Establishment	Farabari	Akcha	Thakurgaon Sadar	Thakurgaon	Dinajpur	108	2	110	90	102	106	250	10	260	1	1	1	3
870	2019-05-12	10:30 AM - 11:30 AM	Uttan of Akbor House	Farmer house	Kashor Para	Nargon	Thakurgaon Sadar	Thakurgaon	Dinajpur	33	8	41	36	33	41	33	8	41	1	1	1	3
871	2019-05-12	12:00 PM -1:00 PM	Gohorpara Bishunu Mondir	Religious Establishment	Gohor Para	Nargon	Thakurgaon Sadar	Thakurgaon	Dinajpur	26	18	44	31	27	44	26	18	44	1	1	1	3
872	2019-05-12	3:30 PM -4:30 PM	Uttan of Subat House	Farmer house	Boshvanga	Begunbari	Thakurgaon Sadar	Thakurgaon	Dinajpur	15	29	44	41	35	44	15	29	44	1	1	1	3
873	2019-05-12	5:30 PM - 6:30 PM	Begunbari School Field	Educational Institution	Begunbari	Begunbari	Thakurgaon Sadar	Thakurgaon	Dinajpur	50	2	52	46	43	52	50	2	52	1	1	1	3
874	2019-05-12	7:00 PM - 8:10 PM	Vumi Office Field	Vumi Office	Shiadpur	Begunbari	Thakurgaon Sadar	Thakurgaon	Dinajpur	103	8	111	104	81	111	330	10	340	1	1	1	3
875	2019-06-12	10:00 AM - 11:30 AM	Uttan of Alauddin House	Farmer house	Rajagaon	Rajagaon	Thakurgaon Sadar	Thakurgaon	Dinajpur	35	23	58	46	46	58	35	23	58	1	1	1	3
876	2019-06-12	2:50 PM -4:10 PM	Field of Union Porishad Field	Union Parishad Campus	Horinarayanpur	Mohammedpur	Thakurgaon Sadar	Thakurgaon	Dinajpur	60	14	74	70	68	74	60	14	74	1	1	1	3
877	2019-06-12	5:00 PM - 6:20 PM	Sulkurhat Bazar	Market place	Aragiampur	Mohammedpur	Thakurgaon Sadar	Thakurgaon	Dinajpur	120	2	122	104	109	113	320	10	330	1	1	1	3
878	2019-06-12	7:00 PM - 8:20 PM	Gilabari Bazar	Market place	Rasulpur	Mohammedpur	Thakurgaon Sadar	Thakurgaon	Dinajpur	102	16	118	113	112	113	260	30	290	1	1	1	3
879	2019-07-12	4:00 PM - 5:30 PM	Mirgor School Field	Educational Institution	Mirgor	Dhakkamara	Panchagarh Sadar	Panchagarh	Dinajpur	110	0	110	91	100	96	350	0	350	1	1	1	3
880	2019-07-12	6:20 PM - 7:50 PM	Bazrapara Bazar	Market place	Bazra Para	Garinabari	Panchagarh Sadar	Panchagarh	Dinajpur	57	0	57	51	51	48	57	0	57	1	1	1	3
881	2019-08-12	9:00 AM - 10:20 AM	Uttan of Atin House	Farmer house	Golaha Para	Kamat Kajoldighi	Panchagarh Sadar	Panchagarh	Dinajpur	35	17	52	50	30	50	35	17	52	1	1	1	3
882	2019-08-12	11:00 AM - 12:10 PM	Uttan of Raficul House	Farmer house	Kikure	Kamat Kajoldighi	Panchagarh Sadar	Panchagarh	Dinajpur	29	30	59	50	48	55	29	30	59	1	1	1	3
883	2019-08-12	2:50 PM - 4:10 PM	Uttan of Razzak House	Farmer house	Danbesh Para	Chaklahat	Panchagarh Sadar	Panchagarh	Dinajpur	28	13	41	40	21	39	28	13	41	1	1	1	3
884	2019-08-12	4:20PM - 5:30 PM	Chaklahat Natun Bazar	Market place	Chaklahat	Chaklahat	Panchagarh Sadar	Panchagarh	Dinajpur	90	2	92	82	66	84	90	2	92	1	1	1	3
885	2019-08-12	6:20 PM - 7:40 PM	Tamla Bazar	Market place	Prodhanpara	Hafizabad	Panchagarh Sadar	Panchagarh	Dinajpur	119	0	119	106	88	105	300	0	300	1	1	1	3
886	2019-09-12	2:05 PM -3:10 PM	Uttan of Joygobindo House	Farmer house	Dangapara	Sonahar	Debiganj	Panchagarh	Dinajpur	18	34	52	52	23	52	18	34	52	1	1	1	3
887	2019-09-12	3:40 PM - 4:50 PM	Uttan of Ajiy House	Farmer house	Mazaprodhan Para	Sonahar	Debiganj	Panchagarh	Dinajpur	6	38	44	40	9	44	6	38	44	1	1	1	3
888	2019-09-12	5:50 PM - 7:00 PM	Sonahar Bazar	Market place	Sonahar	Sonahar	Debiganj	Panchagarh	Dinajpur	119	0	119	115	48	119	350	0	350	1	1	1	3
889	2019-09-12	7:30 PM - 8:40 PM	Gogpur Bazar	Market place	Gogpur	Debiganj	Debiganj	Panchagarh	Dinajpur	58	0	58	56	18	58	58	0	58	1	1	1	3
890	2019-10-12	9:30 AM - 10 :45 AM	Uttan of Sukur House	Farmer house	Ramgong Bilashipara	Tepriganj	Debiganj	Panchagarh	Dinajpur	24	17	41	32	5	41	24	17	41	1	1	1	3
891	2019-10-12	12:00 PM - 1:40 PM	Bishono Mondir Field	Religious Establishment	Bolorampur	Chilahati	Debiganj	Panchagarh	Dinajpur	32	13	45	36	20	45	32	13	45	1	1	1	3
892	2019-10-12	2:40 Pm - 3:55 PM	Bishno Mondir	Religious Establishment	Kamalpara	Debiduba	Debiganj	Panchagarh	Dinajpur	14	35	49	40	32	43	14	35	49	1	1	1	3
893	2019-10-12	4:00 PM - 5:10 PM	Uttan of Azijer House	Farmer house	Mohaldarpara	Debiduba	Debiganj	Panchagarh	Dinajpur	16	25	41	30	9	41	16	25	41	1	1	1	3
894	2019-10-12	6:00 PM - 7:30 PM	Laxmirhat Dhanhata	Market place	Laxmirhat	Debiduba	Debiganj	Panchagarh	Dinajpur	65	0	65	55	42	55	65	0	65	1	1	1	3
895	2019-11-12	1:40 PM- 3:00 PM	Uttan of Aeice Ali House	Farmer house	Cornaido Mottoli	Chalgazi	Dinajpur Sadar	Dinajpur	Dinajpur	22	19	41	39	8	39	22	19	41	1	1	1	3
896	2019-11-12	4:30 PM -5:40 PM	Tea Store Side	Tea-stall	Gobindo pur	Chalgazi	Dinajpur Sadar	Dinajpur	Dinajpur	34	26	60	59	22	60	34	26	60	1	1	1	3
897	2019-11-12	6:45 PM - 7:50 PM	Borilbonkali Bazar	Market place	Borilbonkali	Chalgazi	Dinajpur Sadar	Dinajpur	Dinajpur	111	5	116	110	48	114	340	10	350	1	1	1	3
898	2019-12-12	9:20 PM - 11:00 PM	Tea Store Side	Tea-stall	Amoriar	Sundorbon	Dinajpur Sadar	Dinajpur	Dinajpur	50	10	60	58	11	61	50	10	60	1	1	1	3
899	2019-12-12	12:30 PM - 2:00 PM	Prodhan Pars Mosque Side	Religious Establishment	Ranipur Prodhanpara	Fazilpur	Dinajpur Sadar	Dinajpur	Dinajpur	41	4	45	35	9	45	41	4	45	1	1	1	3
900	2019-12-12	3:30 PM - 4:50 PM	Uttan of Rashed House	Farmer house	Moharajpur	Fazilpur	Dinajpur Sadar	Dinajpur	Dinajpur	20	27	47	44	12	47	20	27	47	1	1	1	3
901	2019-12-12	5:40 PM - 7:00 PM	Madov pur Bazar	Market place	Madovpur	Fazilpur	Dinajpur Sadar	Dinajpur	Dinajpur	109	0	109	104	9	109	380	0	380	1	1	1	3
902	2019-12-12	7:10 PM -8:10 PM	Burirhat	Market place	Purbo Pergoan	Fazilpur	Dinajpur Sadar	Dinajpur	Dinajpur	69	8	77	67	27	77	69	8	77	1	1	1	3
903	13/12/2019	9:30 PM - 11:00 PM	Uttan of Ziaur House	Farmer house	Sundorbon	Sundorbon	Dinajpur Sadar	Dinajpur	Dinajpur	24	18	42	42	14	42	24	18	42	1	1	1	3
904	13/12/2019	12:00 PM - 1:20 PM	Shatshango Accrom	Religious Establishment	Ponkishapara	Sundorbon	Dinajpur Sadar	Dinajpur	Dinajpur	15	25	40	38	8	40	15	25	40	1	1	1	3
905	13/12/2019	3:00 PM - 4:05 PM	Uttan of Mimon House	Farmer house	Kakikapur	Sundorbon	Dinajpur Sadar	Dinajpur	Dinajpur	16	20	36	33	9	36	16	20	36	1	1	1	3
906	13/12/2019	4:30 PM -5:30 PM	Uttan of Bishownath	Farmer house	Bellbari	Rumdubi Hat	Dinajpur Sadar	Dinajpur	Dinajpur	27	25	52	49	20	49	27	25	52	1	1	1	3
907	13/12/2019	6:30 PM - 8:00 PM	Jamtoly Bazar	Market place	Nashipur	Chalgazi	Dinajpur Sadar	Dinajpur	Dinajpur	86	0	86	80	36	83	86	0	86	1	1	1	3
908	14/12/2019	10:30 AM - 11:50 AM	Uttan of Manna House	Farmer house	Gojdol hat pukur	Sujalpur	Birganj	Dinajpur	Dinajpur	24	35	59	56	19	59	24	35	59	1	1	1	3
909	14/12/2019	12:30 PM - 2:00 PM	Uttan of Alim House	Farmer house	Bboyoul Mary	Sujalpur	Birganj	Dinajpur	Dinajpur	35	23	58	49	17	57	35	23	58	1	1	1	3
910	14/12/2019	3:00 PM - 4:00 PM	Uttan of Rezaul House	Farmer house	Dabipur	Nijpara	Birganj	Dinajpur	Dinajpur	12	29	41	25	9	41	18	38	56	1	1	1	3
911	14/12/2019	4:30 PM - 6:00 PM	Uttan of Rabin House	Farmer house	Damai Ghatra	Nijpara	Birganj	Dinajpur	Dinajpur	18	38	56	51	20	55	18	38	56	1	1	1	3
912	14/12/2019	6:30 PM - 8:00 PM	Kobiraj Hat	Market place	Bijoypur	Bhognagar	Birganj	Dinajpur	Dinajpur	109	3	112	109	25	108	390	10	400	1	1	1	3
913	15/12/2019	10:00AM - 11:20 AM	Goydal Bazar	Market place	Goydal	Sujalpur	Birganj	Dinajpur	Dinajpur	36	8	44	42	7	44	36	8	44	1	1	1	3
914	15/12/2019	12:00 PM - 1:30 PM	Uttan of Janu House	Farmer house	Vogtoma	Paltapur	Birganj	Dinajpur	Dinajpur	20	21	41	36	7	40	20	21	41	1	1	1	3
915	15/12/2019	3:00 PM - 4:10 PM	Uttan of Dharin House	Farmer house	Suadarihat Goan	Moricha	Birganj	Dinajpur	Dinajpur	40	16	56	52	12	56	40	16	56	1	1	1	3
916	15/12/2019	5:10 PM - 6:30 PM	Kalakuti Bazar	Market place	Mohadevpur	Moricha	Birganj	Dinajpur	Dinajpur	110	9	119	110	46	118	350	20	370	1	1	1	3
917	15/12/2019	7:15 PM - 8:30 PM	Gopalgong Bazar	Market place	Aulakhari	Mohonpur	Birganj	Dinajpur	Dinajpur	57	1	58	50	16	57	57	1	58	1	1	1	3
918	16/12/2019	11:20 AM - 12:20 PM	Borohat Bazar	Market place	Borohat	Mohonpur	Birganj	Dinajpur	Dinajpur	59	0	59	58	23	59	59	0	59	1	1	1	3
919	16/12/2019	2:00 PM - 3:00 PM	Side of tea-stall	Tea-stall	Futkimari	Nafanagar	Birganj	Dinajpur	Dinajpur	75	0	75	72	22	75	75	0	75	1	1	1	3
920	16/12/2019	4:00 PM - 5:00 PM	Futkimari Tea-stall Side	Tea-stall	Futkimari	Nafanagar	Bochaganj	Dinajpur	Dinajpur	63	7	70	67	22	69	63	7	70	1	1	1	3
921	17/12/2019	9:20 AM - 11:00 AM	Uttan of Monsur House	Farmer house	Doulasardar Para	Atgaon	Bochaganj	Dinajpur	Dinajpur	14	27	41	41	9	41	14	27	41	1	1	1	3
922	17/12/2019	12:00 PM - 1:00 PM	Uttan of Dharma House	Farmer house	Moiulduar	Atgaon	Bochaganj	Dinajpur	Dinajpur	21	22	43	43	6	43	21	22	43	1	1	1	3
923	17/12/2019	2:40 PM - 3:40 PM	Uttan of Shamim House	Farmer house	Shataman Dangi	Atgaon	Bochaganj	Dinajpur	Dinajpur	29	12	41	35	5	41	29	12	41	1	1	1	3
924	17/12/2019	4:30 PM - 5:30 PM	Hatmodhovpur Bazar	Market place	Hatmodhovpur	Nafanagar	Bochaganj	Dinajpur	Dinajpur	76	0	76	72	17	76	76	0	76	1	1	1	3
925	17/12/2019	6:00 PM -7:30 PM	Sultanpur Bazar	Market place	Sultanpur	Nafanagar	Bochaganj	Dinajpur	Dinajpur	113	0	113	107	32	113	340	0	340	1	1	1	3
926	18/12/2019	10:00 AM - 11:30 AM	Tea Store Side	Tea-stall	Moharajpur	Murshidhat	Bochaganj	Dinajpur	Dinajpur	33	14	47	47	8	47	33	14	47	1	1	1	3
927	18/12/2019	12:00 PM - 1:30 PM	Uttan of Kazol House	Farmer house	Muraripur	Murshidhat	Bochaganj	Dinajpur	Dinajpur	34	21	55	52	14	55	34	21	55	1	1	1	3
928	18/12/2019	2:30 PM - 3:50 PM	Tea Store Side	Tea-stall	Ishania	Eshania	Bochaganj	Dinajpur	Dinajpur	32	14	46	39	3	46	32	14	46	1	1	1	3
929	18/12/2019	4:45 PM - 5:50 PM	Uttan of Asraful House	Farmer house	Parbotipur	Rongaon	Bochaganj	Dinajpur	Dinajpur	20	29	49	46	10	49	20	29	49	1	1	1	3
930	18/12/2019	6:00 PM - 7:30 PM	Shadamohal Bazar	Market place	Bongoan	Rongaon	Bochaganj	Dinajpur	Dinajpur	113	4	117	109	24	117	380	10	390	1	1	1	3
931	19/12/2019	3:30 PM - 4:50 PM	Habibpur School Field	Educational Institution	Habibpur	Mukundopur	Birampur	Dinajpur	Dinajpur	59	0	59	50	17	59	59	0	59	1	1	1	3
932	19/12/2019	5:40 PM - 7:00 PM	Mukundopur Union Parishad Field	Union Parishad Campus	Mukundopur	Mukundopur	Birampur	Dinajpur	Dinajpur	66	0	66	58	8	66	66	0	66	1	1	1	3
933	19/12/2019	7:30 PM - 8:30 PM	Vogobotipur School Field	Educational Institution	Vogobotipur	Katla	Birampur	Dinajpur	Dinajpur	41	3	44	34	44	3	41	3	44	1	1	1	3
934	20/12/2019	9:00 AM - 10:20 AM	Pargobindopur School Field	Educational Institution	Parvabanipur	Mukundopur	Birampur	Dinajpur	Dinajpur	43	31	74	67	16	74	43	31	74	1	1	1	3
935	20/12/2019	11:00 AM - 12:30 PM	Uttan of Dharin House	Farmer house	Choughoria	Katla	Birampur	Dinajpur	Dinajpur	13	28	41	10	41	2	13	28	41	1	1	1	3
936	20/12/2019	3:00 PM - 4:00 PM	Uttan of Ajiyul House	Farmer house	Madovpara	dior	Birampur	Dinajpur	Dinajpur	46	13	59	53	10	59	46	13	59	1	1	1	3
937	20/12/2019	4:30 PM - 5:30 PM	Uttan of Unius House	Farmer house	Daudpur	Katla	Birampur	Dinajpur	Dinajpur	21	44	65	50	14	65	21	44	65	1	1	1	3
938	20/12/2019	6:20 PM - 7:20 PM	katla School Field	Educational Institution	Katla	Katla	Birampur	Dinajpur	Dinajpur	58	1	59	51	19	58	58	1	59	1	1	1	3
939	21/12/2019	10:00 AM - 11:20 AM	Uttan of Harun House	Farmer house	Kalabari	Bulakipur	Gharaghat	Dinajpur	Dinajpur	18	23	41	31	4	41	18	23	41	1	1	1	3
940	21/12/2019	12:00 PM - 1:00 PM	Utta of Kobirul House	Farmer house	Krishnorampur	Bulakipur	Gharaghat	Dinajpur	Dinajpur	20	21	41	38	6	41	20	21	41	1	1	1	3
941	21/12/2019	2:30 PM - 3:50 PM	Uttan of Anamul Haqe House	Farmer house	Matalpara	Bulakipur	Gharaghat	Dinajpur	Dinajpur	36	15	51	41	2	51	36	15	51	1	1	1	3
942	21/12/2019	4:00 PM - 5:00 PM	Uttan of patgha House	Farmer house	Kashigari	Singra	Gharaghat	Dinajpur	Dinajpur	31	33	64	52	9	64	31	33	64	1	1	1	3
943	21/12/2019	5:40 PM - 6:40 PM	Tea Store Side	Tea-stall	Rramsharpur	Singra	Gharaghat	Dinajpur	Dinajpur	21	37	58	38	6	56	21	37	58	1	1	1	3
944	22/12/2019	10:00 AM - 11:20 AM	Chars Field	Religious Establishment	Baganal para	Palsha	Gharaghat	Dinajpur	Dinajpur	21	24	45	36	14	45	21	24	45	1	1	1	3
945	22/12/2019	12:00 PM - 1:00 PM	Uttan of Alom House	Farmer house	Baloya	Palsha	Gharaghat	Dinajpur	Dinajpur	33	9	42	32	1	42	33	9	42	1	1	1	3
946	22/12/2019	2:30 PM - 3:40 PM	Uttan of Sultan House	Farmer house	Gobindopur	Gharaghat	Gharaghat	Dinajpur	Dinajpur	17	33	50	37	8	50	17	33	50	1	1	1	3
947	22/12/2019	4:00 PM - 5:15 PM	Side of tea-stall	Tea-stall	Iradpara	Gharaghat	Gharaghat	Dinajpur	Dinajpur	19	21	40	37	6	40	19	21	40	1	1	1	3
948	22/12/2019	5:40 PM - 7:00 PM	Abdul Mojit Chatal	Road Side	Shampur	Gharaghat	Gharaghat	Dinajpur	Dinajpur	33	14	47	43	5	47	33	14	47	1	1	1	3
949	23/12/2019	11:30 PM - 12:30 PM	Uttan of Humaun House	Farmer house	Knalakpur	Kushdaha	Nobabgong	Dinajpur	Dinajpur	32	9	41	40	5	41	32	9	41	1	1	1	3
950	23/12/2019	1:30 PM - 2:30 PM	Side of tea-stall	Tea-stall	Kusdhua	Kushdaha	Nobabgong	Dinajpur	Dinajpur	46	0	46	45	14	46	46	0	46	1	1	1	3
951	23/12/2019	3:40 PM - 4:40 PM	Uttan of Anarul House	Farmer house	Dangapara	Kushdaha	Nobabgong	Dinajpur	Dinajpur	12	33	45	39	3	45	12	33	45	1	1	1	3
952	23/12/2019	5:30 PM - 6:30 PM	Dabipur School Field	Educational Institution	Dabipur	Kushdaha	Nobabgong	Dinajpur	Dinajpur	15	37	52	51	11	52	15	37	52	1	1	1	3
953	23/12/2019	7:00 PM - 8:20 PM	Hilidhanga Bazar	Market place	Hilidhanga	Kushdaha	Nobabgong	Dinajpur	Dinajpur	120	0	120	117	23	118	380	0	380	1	1	1	3
954	24/12/2019	9:30 AM - 10:50 AM	Uttan of Mostofa House	Farmer house	Kistogibonpur	Binodnagar	Nobabgong	Dinajpur	Dinajpur	12	40	52	46	12	52	12	40	52	1	1	1	3
955	24/12/2019	11:20 AM - 12:45 PM	Uttan of Jahangir House	Farmer house	Dansherghat	Binodnagar	Nobabgong	Dinajpur	Dinajpur	34	21	55	51	5	55	34	21	55	1	1	1	3
956	24/12/2019	2:40 PM - 3:30 PM	Tea Store Side	Tea-stall	Muradpur	Daudpur	Nobabgong	Dinajpur	Dinajpur	43	6	49	43	1	49	43	6	49	1	1	1	3
957	24/12/2019	4:30 PM -5:30 PM	Tea Store Side	Tea-stall	Jumanpara	Daudpur	Nobabgong	Dinajpur	Dinajpur	69	2	71	58	21	71	69	2	71	1	1	1	3
958	24/12/2019	6:30 PM - 7:50 PM	Nobabgoan Alim Madrasha Field	Educational Institution	Rampur	Golapgonj	Nobabgong	Dinajpur	Dinajpur	70	0	70	53	8	70	70	0	70	1	1	1	3
959	25/12/2019	12:00 PM - 1:00 PM	Uttan of jaforpur School Field	Educational Institution	Jaforpur	Shibnagor	Fulbari	Dinajpur	Dinajpur	37	10	47	47	0	47	37	10	47	1	1	1	3
960	25/12/2019	2:30 PM - 3:30 PM	Uttan of Sawukat House	Farmer house	Sowani	Aladipur	Fulbari	Dinajpur	Dinajpur	24	17	41	39	7	41	24	17	41	1	1	1	3
961	25/12/2019	4:00 PM - 5:20 PM	Uttan of Nurul House	Farmer house	Razarampur	Shibnagor	Fulbari	Dinajpur	Dinajpur	24	35	59	53	59	2	24	35	59	1	1	1	3
962	25/12/2019	6:00 PM - 7:00 PM	Ammdungi hat	Market place	Aludanga	Shibnagor	Fulbari	Dinajpur	Dinajpur	59	0	59	59	0	59	59	0	59	1	1	1	3
963	25/12/2019	7:40 PM - 8:50 PM	Shibnagor Union Parishad Field	Union Parishad Campus	Shibnagor	Shibnagor	Fulbari	Dinajpur	Dinajpur	64	0	64	55	3	64	64	0	64	1	1	1	3
964	26/12/2019	9:00 AM - 10:30 AM	Durga Mondir	Religious Establishment	Gonipur	Aluari	Fulbari	Dinajpur	Dinajpur	25	28	53	44	3	53	25	28	53	1	1	1	3
965	26/12/2019	12:00 PM - 1:00 PM	Uttan of Joinal House	Farmer house	Baneher	Aluari	Fulbari	Dinajpur	Dinajpur	38	6	44	30	1	44	38	6	44	1	1	1	3
966	26/12/2019	3:00 PM - 4:00 PM	Uttan of Hobibor House	Farmer house	Uttarjagotathpara	Aluari	Fulbari	Dinajpur	Dinajpur	26	27	53	40	0	53	26	27	53	1	1	1	3
967	26/12/2019	4:00 PM - 5:20 PM	Ruddani School Field	Educational Institution	Ruddani	Aluari	Fulbari	Dinajpur	Dinajpur	41	17	58	44	3	58	41	17	58	1	1	1	3
968	26/12/2019	6:00 PM - 7:30 PM	Jolpaitola Bazar	Market place	Parikata	Aluari	Fulbari	Dinajpur	Dinajpur	126	0	126	67	8	126	390	0	390	1	1	1	3
969	27/12/2019	10:00 AM - 11:30 AM	Durga Mondir Field	Religious Establishment	Purbo Rossulpur	Horirampur	Parbatipur	Dinajpur	Dinajpur	35	44	79	78	4	79	35	44	79	1	1	1	3
970	27/12/2019	2:00 PM - 3:00 PM	Uttan of Fajlul House	Farmer house	Possimpara	Horirampur	Parbatipur	Dinajpur	Dinajpur	38	8	46	45	0	46	38	8	46	1	1	1	3
971	27/12/2019	3:30 PM - 4:20 PM	Uttan of Rabbani House	Farmer house	Dakhiaroriampur	Horirampur	Parbatipur	Dinajpur	Dinajpur	25	16	41	37	2	41	25	16	41	1	1	1	3
972	27/12/2019	5:00 PM - 6:20 PM	Uttan of Vanu House	Farmer house	Hindupara	Horirampur	Parbatipur	Dinajpur	Dinajpur	32	21	53	46	3	53	32	21	53	1	1	1	3
973	27/12/2019	7:20 PM - 8:40 PM	Moulovi Bazar	Market place	Shapara	Horirampur	Parbatipur	Dinajpur	Dinajpur	127	0	127	115	0	127	340	0	340	1	1	1	3
974	28/12/2019	9:45 AM - 11:20 AM	Uttan of Monoranjon House	Farmer house	Ramchandrapur	Ramchandrapur	Kharol	Dinajpur	Dinajpur	25	15	40	39	1	40	25	15	40	1	1	1	3
975	28/12/2019	12:00 PM -1:00 PM	Uttan of Gongadhar House	Farmer house	Rasulpur	Rasulpur	Kharol	Dinajpur	Dinajpur	13	28	41	36	1	41	13	28	41	1	1	1	3
976	28/12/2019	3:00 PM -4:00 PM	Khohalpur School Field	Educational Institution	Khohalpur	Rasulpur	Kharol	Dinajpur	Dinajpur	45	41	86	84	0	86	45	41	86	1	1	1	3
977	28/12/2019	5:00 PM - 6:20 PM	Uttan of Chandi Mondir	Religious Establishment	Paharpur	Rasulpur	Kharol	Dinajpur	Dinajpur	29	23	52	49	4	52	29	23	52	1	1	1	3
978	28/12/2019	7:00 PM - 8:20 PM	Bolea Bazar	Market place	Bongour	Targao	Kharol	Dinajpur	Dinajpur	97	1	98	97	1	98	97	1	98	1	1	1	3
979	29/12/2019	9:30 AM - 10:30 AM	Sataul More	Road Side	Chataul	Targao	Kharol	Dinajpur	Dinajpur	44	3	47	47	0	47	44	3	47	1	1	1	3
980	29/12/2019	11:00 AM - 12:20 PM	Uttan of Khitish House	Farmer house	Shapara	Targao	Kharol	Dinajpur	Dinajpur	30	41	71	63	2	71	30	41	71	1	1	1	3
981	29/12/2019	3:00 PM - 5:00 PM	Mondir Filed	Religious Establishment	Purbo Sultanpur	Ramchandrapur	Kharol	Dinajpur	Dinajpur	50	56	106	94	0	106	50	56	106	1	1	1	3
982	29/12/2019	5:30 PM - 6:30 PM	Chuagoan Mor	Market place	Ramchandrapur	Ramchandrapur	Kharol	Dinajpur	Dinajpur	56	0	56	52	0	56	56	0	56	1	1	1	3
983	29/12/2019	7:00 PM - 8:00 PM	Kharol Bazar	Market place	Kharol	Ramchandrapur	Kharol	Dinajpur	Dinajpur	49	0	49	49	11	49	49	0	49	1	1	1	3
984	30/12/2019	9:30 AM -11:00 AM	Uttan of Mokshadul House	Farmer house	Mohammod pur	Mukundopur	Kharol	Dinajpur	Dinajpur	35	20	55	51	0	55	35	20	55	1	1	1	3
985	30/12/2019	12:00 PM - 1:00 PM	Tea Store Side	Tea-stall	Bikrampur	Mukundopur	Kharol	Dinajpur	Dinajpur	31	22	53	43	0	53	31	22	53	1	1	1	3
986	30/12/2019	2:30 PM - 3:40 PM	Uttan of Nurislam House	Farmer house	Pohoria	Mukundopur	Kharol	Dinajpur	Dinajpur	18	34	52	42	0	52	18	34	52	1	1	1	3
987	30/12/2019	4:20 PM - 5:20 PM	Uttan of Jahingir House	Farmer house	Dhipakura	Mukundopur	Kharol	Dinajpur	Dinajpur	56	44	100	88	0	100	120	100	220	1	1	1	3
988	30/12/2019	6:00 PM - 7:30 PM	Botala Bazar	Market place	Mukundopur	Mukundopur	Kharol	Dinajpur	Dinajpur	111	0	111	94	1	111	350	0	350	1	1	1	3
989	31/12/2019	9:30 AM - 11:00 AM	Uttan of Jashim Uddin	Farmer house	Gochahar	Alokdihi	Chirrbondor	Dinajpur	Dinajpur	36	5	41	30	12	41	36	5	41	1	1	1	3
990	31/12/2019	12:00 PM - 1:00 PM	Madrasha Field	Educational Institution	Tatulia	Alokdihi	Chirrbondor	Dinajpur	Dinajpur	29	16	45	34	3	44	29	16	45	1	1	1	3
991	31/12/2019	4:00 PM - 5:30 PM	Sundorbon School Field	Educational Institution	Sundorbon	Sundorbon	Dinajpur Sadar	Dinajpur	Dinajpur	34	41	75	65	12	71	34	41	75	1	1	1	3
992	31/12/2019	6:10 PM - 7:20 PM	Voshir Bazar	Market place	Tatulia	Tetulia	Chirrbondor	Dinajpur	Dinajpur	130	0	130	114	7	129	390	0	390	1	1	1	3
993	31/12/2019	7:40 PM - 9:00 PM	Mondir Filed	Religious Establishment	Sarkarpara	Sundorbon	Dinajpur Sadar	Dinajpur	Dinajpur	54	5	59	55	3	59	54	5	59	1	1	1	3
994	1//1/2020	10:00 AM - 11:10 AM	Tea Store Side	Tea-stall	Vabki	Bhognagar	Birganj	Dinajpur	Dinajpur	30	46	76	60	16	76	30	46	76	1	1	1	3
995	1//1/2020	12:00 PM - 1:00 PM	Uttan of Mahatab House	Farmer house	Borobhabik	Bhognagar	Birganj	Dinajpur	Dinajpur	21	35	56	54	6	56	21	35	56	1	1	1	3
996	1//1/2020	2:30 PM - 3:35 PM	Uttan of Aminur House	Farmer house	Kalapukur	Bhognagar	Birganj	Dinajpur	Dinajpur	30	39	69	67	5	69	30	39	69	1	1	1	3
997	1//1/2020	4:00 PM - 5:20 PM	Uttan of Yasin House	Farmer house	Bholanathpur	Bhognagar	Birganj	Dinajpur	Dinajpur	43	46	89	85	3	88	43	46	89	1	1	1	3
998	1//1/2020	6:00 PM - 7:00 PM	Pulhat Bazar	Market place	Nougar	Bhognagar	Birganj	Dinajpur	Dinajpur	62	4	66	60	6	66	62	4	66	1	1	1	3
999	1//1/2020	7:30 PM - 8:00 PM	Chakmohanpur Bazar	Market place	Chakmohanpur	Bhognagar	Birganj	Dinajpur	Dinajpur	72	4	76	64	2	76	72	4	76	1	1	1	3
1000	2020-02-01	2:00 PM - 3:00 PM	Uttan of Ajij Uddin	Farmer house	Vimpur	Alompur	Taragoanj	Rangpur	Dinajpur	24	28	52	41	6	52	24	28	52	1	1	1	3
1001	2020-02-01	3:30 PM - 4:30 PM	Uttan of Bishadu House	Farmer house	Shamgony	Sauaer	Taragoanj	Rangpur	Dinajpur	35	21	56	25	30	56	35	21	56	1	1	1	3
1002	2020-02-01	5:00 PM - 6:20 PM	Uttan of Mukul House	Farmer house	Kacharipara	Sauaer	Taragoanj	Rangpur	Dinajpur	23	24	47	32	11	47	23	24	47	1	1	1	3
1003	2020-02-01	6:40 PM - 7:40 PM	Alahir Bazar	Market place	Dangipara	Sauaer	Taragoanj	Rangpur	Dinajpur	114	14	128	89	38	128	340	60	400	1	1	1	3
1004	2020-02-01	8:30 PM - 9:30 PM	Dholaighat Bazar	Market place	Chaktaira	Alompur	Taragoanj	Rangpur	Dinajpur	100	0	100	89	11	100	300	0	300	1	1	1	3
1005	2020-03-01	10:30 PM - 12:00 PM	Uttan of Dhoniran	Farmer house	Palashbari	Kurcha	Taragoanj	Rangpur	Dinajpur	17	24	41	35	4	41	17	24	41	1	1	1	3
1006	2020-03-01	2:30 PM - 3:40 PM	Uttan of Abdul Rashid House	Farmer house	Hariarkuti Sarkaerpara	Harijar Kutti	Taragoanj	Rangpur	Dinajpur	9	32	41	37	0	41	9	32	41	1	1	1	3
1007	2020-03-01	4:20 PM - 5:20 PM	School Field	Farmer house	Fakirpara	Harijar Kutti	Taragoanj	Rangpur	Dinajpur	27	23	50	42	2	50	27	23	50	1	1	1	3
1008	2020-03-01	6:00 PM - 7:00 PM	Hariarkutti Union Parishad Field	Union Parishad Campus	Dangipara	Harijar Kutti	Taragoanj	Rangpur	Dinajpur	93	2	95	83	8	93	245	5	250	1	1	1	3
1009	2020-03-01	7:30 PM - 8:30 PM	Imampara Bazar	Market place	Imampara	Harijar Kutti	Taragoanj	Rangpur	Dinajpur	41	0	41	30	1	41	41	0	41	1	1	1	3
1010	2020-04-01	11:00 AM - 12:00 PM	Side of tea-stall	Tea-stall	Aitalkhair para	Kasirambelpukur	Syedpur	Nilphamari	Dinajpur	15	25	40	19	6	40	15	25	40	1	1	1	3
1011	2020-04-01	1:20 PM - 2:00 PM	Kalimondir Side	Religious Establishment	Nijbari	Kasirambelpukur	Syedpur	Nilphamari	Dinajpur	19	24	43	30	0	43	19	24	43	1	1	1	3
1012	2020-04-01	3:00 PM - 4:00 PM	Uttan of Abu Talab House	Farmer house	Belpukur Satpai	Kasirambelpukur	Syedpur	Nilphamari	Dinajpur	24	26	50	32	5	50	24	26	50	1	1	1	3
1013	2020-04-01	4:30 PM - 5:30 PM	Uttan of Hamid House	Farmer house	Choudhari Para	Kasirambelpukur	Syedpur	Nilphamari	Dinajpur	25	34	59	41	2	59	25	34	59	1	1	1	3
1014	2020-04-01	6:00 PM - 7:20 PM	Chaura Bazar	Farmer house	Paulpara	Kasirambelpukur	Syedpur	Nilphamari	Dinajpur	130	0	130	95	4	130	400	0	400	1	1	1	3
1015	2020-05-01	12:00 PM - 1:00 PM	Uttan of Pashor House	Farmer house	Purbo Balakgram	Balagram	Jaldhaka	Nilphamari	Dinajpur	20	24	44	41	2	43	20	24	44	1	1	1	3
1016	2020-05-01	2:30 PM - 3:30 PM	Brac School Field	Educational Institution	Sarderpara	Balagram	Jaldhaka	Nilphamari	Dinajpur	28	27	55	52	0	55	28	27	55	1	1	1	3
1017	2020-05-01	4:30 PM - 5:30 PM	Balagram Chourangi Bazar	Market place	Balagram	Balagram	Jaldhaka	Nilphamari	Dinajpur	131	0	131	100	0	131	400	0	400	1	1	1	3
1018	2020-05-01	7:00 PM - 8:20 PM	Golamondu Bazar	Market place	Golomondu	Golmunda	Jaldhaka	Nilphamari	Dinajpur	113	0	113	105	0	113	300	0	300	1	1	1	3
1019	2020-06-01	10:00 AM - 11:00 AM	Mondir Filed	Religious Establishment	Bhogamari	Khatli	Jaldhaka	Nilphamari	Dinajpur	40	29	69	62	0	68	40	29	69	1	1	1	3
1020	2020-06-01	12:00 PM - 1:00 PM	Ronger Bazar	Market place	Parchim Khatili	Khatli	Jaldhaka	Nilphamari	Dinajpur	44	1	45	36	0	44	44	1	45	1	1	1	3
1021	2020-06-01	2:30 PM - 3:30 PM	Uttan of Moklachur House	Farmer house	Khacimada	Dhormopal	Jaldhaka	Nilphamari	Dinajpur	39	32	71	67	0	71	39	32	71	1	1	1	3
1022	2020-06-01	4:30 PM - 5:30 PM	Uttan of Roficul House	Farmer house	Roshidpur	Dhormopal	Jaldhaka	Nilphamari	Dinajpur	26	29	55	51	0	55	26	29	55	1	1	1	3
1023	2020-06-01	6:10 PM - 7:30 PM	Kharkati Bazar	Market place	Kharkati	Dhormopal	Jaldhaka	Nilphamari	Dinajpur	138	0	138	118	0	138	350	0	350	1	1	1	3
1024	2020-07-01	10:00 AM - 11:00 AM	Mondir Filed	Religious Establishment	Ramdanga	Dimal	Dimla	Nilphamari	Dinajpur	17	29	46	42	0	46	17	29	46	1	1	1	3
1025	2020-07-01	11:30 AM - 12:40 PM	Ammtoli Bazar	Market place	Ammtoli	Dimal	Dimla	Nilphamari	Dinajpur	48	5	53	50	0	53	48	5	53	1	1	1	3
1026	2020-07-01	2:30 PM - 3:30 PM	Uttan of madhov	Farmer house	Rupahara	Balapara	Dimla	Nilphamari	Dinajpur	37	24	61	51	1	61	37	24	61	1	1	1	3
1027	2020-07-01	4:00 PM - 5:00 PM	School Field	Educational Institution	Ultartitpara	Balapara	Dimla	Nilphamari	Dinajpur	13	31	44	34	0	44	13	31	44	1	1	1	3
1028	2020-07-01	6:00 PM - 7:00 PM	Tunirhat	Market place	Bandarkhari Bari	Khagakhori Bari	Dimla	Nilphamari	Dinajpur	148	0	148	141	10	147	400	0	400	1	1	1	3
1029	2020-08-01	10:00 AM - 11:00 AM	Mondir Filed	Religious Establishment	Adikari para	KhalishaChapani	Dimla	Nilphamari	Dinajpur	45	17	62	52	0	61	45	17	62	1	1	1	3
1030	2020-08-01	11:40 AM - 12:50 PM	Challapara Bazar	Market place	challapara	Junagash	Dimla	Nilphamari	Dinajpur	46	13	59	53	0	59	46	13	59	1	1	1	3
1031	2020-08-01	3:00 PM - 4:00 PM	Uttan of Ieakub House	Farmer house	Uttar sona Khali	Junagash	Dimla	Nilphamari	Dinajpur	32	14	46	43	0	46	32	14	46	1	1	1	3
1032	2020-08-01	4:30 PM - 5:30 PM	School Field	Educational Institution	Binna kuri	Junagash	Dimla	Nilphamari	Dinajpur	26	21	47	37	0	47	26	21	47	1	1	1	3
1033	2020-08-01	6:20 PM - 7:40 PM	Chapani Bazar	Market place	Chapani	Junagash	Dimla	Nilphamari	Dinajpur	166	0	166	140	0	166	600	0	600	1	1	1	3
1034	2020-09-01	10:30 AM - 11:30 AM	Uttan of A.B.M Nuruzzaman House	Farmer house	Dhumpara	Golmunda	Jaldhaka	Nilphamari	Dinajpur	27	13	40	35	0	39	27	13	40	1	1	1	3
1035	2020-09-01	2:00 PM - 3:00 PM	Upazila Parishad	Upazila Parishad	Joldhaka Upazila	Joldhaka	Jaldhaka	Nilphamari	Dinajpur	37	23	60	N/A	N/A	N/A	37	23	60	1	1	1	3
1036	2020-09-01	4:20 PM - 5:30 PM	Uttan of Abu Aual House	Farmer house	Sittmirgonj	Balagram	Jaldhaka	Nilphamari	Dinajpur	21	32	53	45	1	53	21	32	53	1	1	1	3
1037	2020-09-01	6:00 PM - 7:00 PM	Bongobondhu Bazar	Market place	Kaligonj	Golna	Jaldhaka	Nilphamari	Dinajpur	131	0	131	125	0	129	350	0	350	1	1	1	3
1038	2020-09-01	7:20 PM - 8:20 PM	Auidnala Bazar	Market place	Shalor	Balagram	Jaldhaka	Nilphamari	Dinajpur	66	0	66	63	6	66	66	0	66	1	1	1	3
1039	2020-10-01	9:30 AM - 11:20 PM	Uttan of Abdul Karim House	Farmer house	Majhapara	Putimary	Kishoregonj	Nilphamari	Dinajpur	18	33	51	44	1	51	18	33	51	1	1	1	3
1040	2020-10-01	12:00 PM - 1:00 PM	Uttan of Parashg House	Farmer house	Sathpai	Putimary	Kishoregonj	Nilphamari	Dinajpur	26	25	51	40	1	50	26	25	51	1	1	1	3
1041	2020-10-01	2:40 PM - 4:40 PM	Uttan of Motaleb House	Farmer house	Mazapara	Kishor	Kishoregonj	Nilphamari	Dinajpur	18	24	42	35	0	41	18	24	42	1	1	1	3
1042	2020-10-01	4:30 PM - 5:30 PM	Mondir Filed	Religious Establishment	Rashipara	Chandkahan	Kishoregonj	Nilphamari	Dinajpur	13	41	54	41	0	54	13	41	54	1	1	1	3
1043	2020-10-01	6:20 PM - 7:30 PM	Hazirhat	Market place	Dhakkin Singergari	Magura	Kishoregonj	Nilphamari	Dinajpur	72	1	73	53	4	72	72	1	73	1	1	1	3
1044	2020-11-01	10:30 AM - 11:30 AM	Uttan of Ziaur Haque House	Farmer house	Uttor Chandkhana	Chandkahan	Kishoregonj	Nilphamari	Dinajpur	17	30	47	25	0	47	17	30	47	1	1	1	3
1045	2020-11-01	12:00 PM - 1:00 PM	Uttan of Khairul House	Farmer house	Bushuniya Para	Chandkahan	Kishoregonj	Nilphamari	Dinajpur	36	11	47	35	0	46	36	11	47	1	1	1	3
1046	2020-11-01	3:00 PM - 4:00 PM	Mondir Filed	Religious Establishment	Akkelpur	Magura	Kishoregonj	Nilphamari	Dinajpur	32	19	51	41	0	51	32	19	51	1	1	1	3
1047	2020-11-01	4:30 PM - 5:30 PM	Uttan of Amisur Rohaman House	Farmer house	Pathanpara	Magura	Kishoregonj	Nilphamari	Dinajpur	15	30	45	31	0	45	15	30	45	1	1	1	3
1048	2020-11-01	6:20 PM - 7:30 PM	Bangla Bazar	Market place	Banglabazar	Magura	Kishoregonj	Nilphamari	Dinajpur	107	6	113	88	0	111	240	10	250	1	1	1	3
1049	2020-12-01	3:00 PM - 4:00 PM	Uttan of Abdul Kader House	Farmer house	Uttar Gomnati	Gomnati	Domar	Nilphamari	Dinajpur	32	21	53	49	5	52	32	21	53	1	1	1	3
1050	2020-12-01	4:30 PM - 5:30 PM	Gomnati College Field	Educational Institution	Chourangi	Gomnati	Domar	Nilphamari	Dinajpur	55	1	56	54	0	56	55	1	56	1	1	1	3
1051	2020-12-01	6:00 PM - 7:00 PM	Gomnati Bazar	Market place	Gomnati	Gomnati	Domar	Nilphamari	Dinajpur	168	0	168	148	1	162	500	0	500	1	1	1	3
1052	2020-12-01	7:20 PM - 8:20 PM	Bamonia Bazar	Market place	Bamonia	Bamunia	Domar	Nilphamari	Dinajpur	69	0	69	53	1	67	69	0	69	1	1	1	3
1053	13/1/2020	10:30 AM - 11:30 AM	Fediration Field	Educational Institution	Tatipara	Domar	Domar	Nilphamari	Dinajpur	30	11	41	20	11	38	30	11	41	1	1	1	3
1054	13/1/2020	12:00 PM - 1:00 PM	MP More	Market place	Boro Rauta	Domar	Domar	Nilphamari	Dinajpur	45	14	59	37	7	59	45	14	59	1	1	1	3
1055	13/1/2020	2:30 PM - 3:30 PM	Upazila Parishad	Upazila Parishad	Domer Upazila	Domar	Domar	Nilphamari	Dinajpur	22	1	23	N/A	N/A	N/A	22	1	23	1	1	1	3
1056	13/1/2020	4:30 PM - 5:30 PM	Uttan of Abdur Salam House	Farmer house	Matukpur	Panga Motukpur	Domar	Nilphamari	Dinajpur	33	35	68	43	11	67	33	35	68	1	1	1	3
1057	13/1/2020	6:30 PM - 7:30 PM	School Field	Educational Institution	Panga	Panga Motukpur	Domar	Nilphamari	Dinajpur	123	3	126	103	9	125	280	10	290	1	1	1	3
1058	14/1/2020	1:00 PM - 2:00 PM	Uttan of Nurul House	Farmer house	Subra	Chalgazi	Dinajpur Sadar	Dinajpur	Dinajpur	26	24	50	36	2	50	26	24	50	1	1	1	3
1059	14/1/2020	3:00 PM - 6:00 PM	Mondir Filed	Religious Establishment	Nashipur	Chalgazi	Dinajpur Sadar	Dinajpur	Dinajpur	38	42	80	65	5	80	38	42	80	1	1	1	3
1060	14/1/2020	7:00 PM - 8:00 PM	Voddure Bazar	Market place	Ajimpur	Razarampur	Dinajpur Sadar	Dinajpur	Dinajpur	63	0	63	56	0	60	63	0	63	1	1	1	3
1061	14/1/2020	8:30 PM - 9:30 PM	Dashmail Bazar	Market place	Gornurpur	Sundarpurup	Kaharol	Dinajpur	Dinajpur	41	0	41	25	2	38	41	0	41	1	1	1	3
1062	15/1/2020	10:30 AM - 11:30 AM	Uttan of Mofajol House	Farmer house	Ghotroghu	Mohonpur	Khansama	Dinajpur	Dinajpur	34	18	52	45	1	52	34	18	52	1	1	1	3
1063	15/1/2020	12:00 PM - 1:00 PM	School Field	Educational Institution	Gobindo pur	Alokjhari	Khansama	Dinajpur	Dinajpur	21	20	41	39	2	41	21	20	41	1	1	1	3
1064	15/1/2020	2:30 PM - 3:30 PM	Uttan of Jogendro House	Farmer house	Tangua	Bherbheri	Khansama	Dinajpur	Dinajpur	21	23	44	41	1	44	21	23	44	1	1	1	3
1065	15/1/2020	4:00 PM - 5:00 PM	Bijoy Bazar	Market place	Tangua	Bherbheri	Khansama	Dinajpur	Dinajpur	74	0	74	60	4	74	74	0	74	1	1	1	3
1066	15/1/2020	6:00 PM - 7:30 PM	Ramkhola Bazar	Market place	Ramkhola	Bherbheri	Khansama	Dinajpur	Dinajpur	77	0	77	59	5	77	77	0	77	1	1	1	3
1067	16/1/2020	10:00 AM - 11:00 AM	Uttan of Sttar House	Farmer house	Jamal Para	Akoljhari	Khansama	Dinajpur	Dinajpur	16	36	52	46	0	52	16	36	52	1	1	1	3
1068	16/1/2020	12:00 PM- 1:00 PM	Uttan of Joganath House	Farmer house	Roy Para	Akoljhari	Khansama	Dinajpur	Dinajpur	33	8	41	31	0	40	33	8	41	1	1	1	3
1069	17/1/2020	10:00 AM - 11:00 AM	Mondir Filed	Religious Establishment	Talasila	Rajarampur	Birol	Dinajpur	Dinajpur	17	28	45	36	0	45	17	28	45	1	1	1	3
1070	17/1/2020	11:30 AM - 12:30 AM	Girza Field	Religious Establishment	Sultala	Rajarampur	Birol	Dinajpur	Dinajpur	17	18	35	23	0	35	17	18	35	1	1	1	3
1071	17/1/2020	1:00 PM - 2:00 PM	Uttan of Jogonath House	Farmer house	Jhinaikuri	Azimpur	Birol	Dinajpur	Dinajpur	26	14	40	35	0	40	26	14	40	1	1	1	3
1072	17/1/2020	2:20 PM - 3:00 PM	Mondir Filed	Religious Establishment	Razuria	Azimpur	Birol	Dinajpur	Dinajpur	17	24	41	36	0	40	17	24	41	1	1	1	3
1073	17/1/2020	3:20 PM - 4:20 PM	Uttan of Mosadik House	Farmer house	Gobindopur	Azimpur	Birol	Dinajpur	Dinajpur	22	28	50	46	0	50	22	28	50	1	1	1	3
1074	17/1/2020	4:30 PM - 5:20 PM	Uttan of Gofur House	Farmer house	Ultar Shampur	Azimpur	Birol	Dinajpur	Dinajpur	16	25	41	38	0	41	16	25	41	1	1	1	3
1075	17/1/2020	6:30 PM - 7:30 PM	Kathal tola more	Market place	Modhupur	Azimpur	Birol	Dinajpur	Dinajpur	37	1	38	33	0	38	37	1	38	1	1	1	3
1076	18/1/2020	9:00 PM - 10:00 PM	Uttan of Ariful House	Farmer house	Robipur	Birol	Birol	Dinajpur	Dinajpur	29	16	45	35	0	45	29	16	45	1	1	1	3
1077	18/1/2020	10:30 PM - 11:30 PM	Uttan of Alish House	Farmer house	Mondolpara	Bhandra	Birol	Dinajpur	Dinajpur	18	23	41	36	0	40	18	23	41	1	1	1	3
1078	18/1/2020	12:00 PM - 1:00 PM	Uttan of Mukul House	Farmer house	Mothapukur	Birol	Birol	Dinajpur	Dinajpur	28	24	52	37	0	52	28	24	52	1	1	1	3
1079	18/1/2020	2:00 PM - 3:00 PM	Dharapotia Bazar	Market place	Pipolla	Dhamoir	Birol	Dinajpur	Dinajpur	38	3	41	27	0	41	38	3	41	1	1	1	3
1080	18/1/2020	3:30 PM - 4:30 PM	Kashidanga Bazar	Market place	Mollaha Para	Dhamoir	Birol	Dinajpur	Dinajpur	52	0	52	47	0	51	52	0	52	1	1	1	3
